# Supplementary material for: Mechanochemical Synthesis and Biological Evaluation of Novel Isoniazid Derivatives with Potent Antitubercular Activity
Source: PubMed Central journal article supplement (PMC6151834; doi:10.3390/molecules22091457), 2017-09-01

## Supplementary information

Mechanochemical synthesis and biological evaluation of novel isoniazid derivatives with potent antitubercular activity

*Paulo F. M. Oliveira*,<sup>†,‡,§,#</sup> *Brigitte Guidetti*,<sup>‡,§</sup> *Alain Chamayou*,<sup>†</sup> *Christiane André-Barrès*,<sup>‡,§</sup> *Jan Madacki*,<sup>||</sup> *Jana Korduláková*,<sup>||,\*</sup> *Giorgia Mori*,<sup>⊥</sup> *Beatrice Silvia Orena*,<sup>⊥</sup> *Laurent Roberto Chiarelli*,<sup>⊥</sup> *Maria Rosalia Pasca*,<sup>⊥,\*</sup> *Christian Lherbet*,<sup>‡</sup> *Chantal Carayon*,<sup>‡,§</sup> *Stéphane Massou*,<sup>||</sup> *Michel Baron*,<sup>†</sup> *Michel Baltas*,<sup>‡,§,\*</sup>

<sup>†</sup> Université de Toulouse, Mines-Albi, CNRS UMR 5302, Centre RAPSODEE, Campus Jarlard, 81013 Albi Cedex 09, France.

<sup>‡</sup> Université de Toulouse, UPS, CNRS UMR 5068, LSPCMIB, 118 Route de Narbonne, 31062, Toulouse Cedex 09, France.

<sup>§</sup> CNRS; Laboratoire de Synthèse et Physico-Chimie de Molécules d'Intérêt Biologique, LSPCMIB, UMR-5068; 118 Route de Narbonne, F-31062 Toulouse cedex 9, France.

<sup>||</sup> Department of Biochemistry, Comenius University in Bratislava, Faculty of Natural Sciences, Mlynská dolina, Ilkovičova 6, 842 15, Bratislava, Slovakia

<sup>⊥</sup> Department of Biology and Biotechnology "Lazzaro Spallanzani", University of Pavia; via Ferrata 1, 27100 Pavia, Italy.

**Table S1:** Geometries and energies (in atomic units) of minima for *cis* and *transE*-isomers of **1a** obtained at the HF STO-3G level in the gas phase.

**Table S2:** Calculated and experimental <sup>1</sup>H and <sup>13</sup>C NMR chemical shifts in the DMSO, for *cis* and *trans E* isomers of **1a** using the numbering of the modelling.

**Figure S1:** <sup>1</sup>H NMR spectra at increasing temperature (298 to 388K and then return to 298K) for compound **1a**

**Table S3:** Determination of activation energy ( $\Delta G^\ddagger$ ) from coalescence temperatures  $T_c$  and rate exchange  $k_{exch}$  at different chemical shift for the **1a** isomers.

**Table S4:** Geometries and energies of minima for *cis* and *transE*-isomers of **5** obtained at the HF STO-3G level in the gas phase.

**Table S5:** Calculated and experimental <sup>1</sup>H and <sup>13</sup>C NMR chemical shifts in the DMSO, for *cis* and *trans E* isomers of **5** using the numbering of the modelling.

**Figure S2:** <sup>1</sup>H NMR spectra at increasing temperature (298 to 388K and then return to 298K) for **5**

**Table S6:** Determination of activation energy ( $\Delta G^\ddagger$ ) from coalescence temperatures  $T_c$  and rate exchange  $k_{exch}$  at different chemical shift for the isomers of **5**.

**Figure S3:** Stability of compound **1d** in DMSO; A) From top to bottom: full-MS of compound **1d** upon overnight incubation in DMSO; compound **1d** freshly dissolved; INH dissolved in DMSO. B) Fragmentation pattern of the compounds (MS-MS (ESI)@cid30.0).

**Figure S4:** **a.** UV-*vis* spectra obtained for compound **1c** as function of pH variation. **b.** Plots of absorbance for **3** wavelength values ( $\lambda/\text{nm}$ ) as function of pH.

**Figure S5:** **a.** UV-*vis* spectra obtained for compound **1a** as function of pH variation. **b.** Plots of absorbance for **3** wavelength values ( $\lambda/\text{nm}$ ) as function of pH.

**Figure S6:** **a.** UV-*vis* spectra obtained for compound **1b** as function of pH variation. **b.** Plots of absorbance for **3** wavelength values ( $\lambda/\text{nm}$ ) as function of pH.

**Figure S7:** **a.** UV-*vis* spectra obtained for compound **5** as function of pH variation. **b.** Plots of absorbance for **4** wavelength values ( $\lambda/\text{nm}$ ) as function of pH.

**Figure S8:** **a.** UV-*vis* spectra obtained for compound **7** as function of pH variation. **b.** Plots of absorbance for **4** wavelength values ( $\lambda/\text{nm}$ ) as function of pH.

Mass HRMS and NMR data of compounds **2-11** synthesized

|                  | geometry | E(HF)       | $\Delta E(\text{ua})$ | $\Delta E(\text{kcal})$ | %      |
|------------------|----------|-------------|-----------------------|-------------------------|--------|
| <i>transE_1a</i> |          | -801,482133 | 0,00219939            | 1,38016121              | 8,87   |
| <i>cisE_1a</i>   |          | -801,484332 | 0                     | 0                       | 91,12  |
| <i>transZ_1a</i> |          | -801,475096 | 0,0092361             | 5,79583747              | 0,0005 |
| <i>cisZ_1a</i>   |          | -801,475228 | 0,00910358            | 5,71267852              | 0,0006 |

**Table S1:** Geometries and energies (in atomic units) of minima for *cis* and *transE*-isomers of **1a** obtained at the HF STO-3G level in the gas phase.

**Table S2:** Calculated and experimental  $^1\text{H}$  and  $^{13}\text{C}$  NMR chemical shifts in the DMSO, for *cis* and *trans E* isomers of **1a** using the numbering of the modelling.

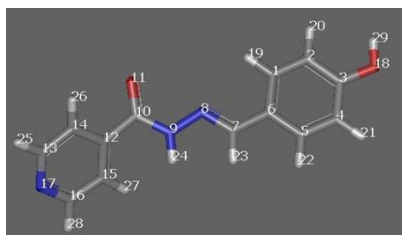

***transE-1a***

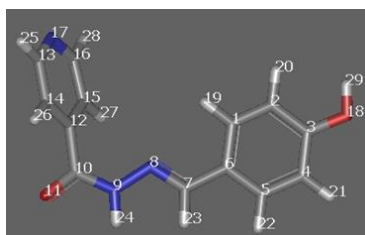

***cisE-1a***

| nuclei | calculated $\delta(\text{ppm})$ |            | experimental $\delta(\text{ppm})$ |             |
|--------|---------------------------------|------------|-----------------------------------|-------------|
|        | <i>trans</i>                    | <i>cis</i> | <i>majo</i>                       | <i>mino</i> |
| 1, 5   | 129.35                          | 128.94     | 128.88                            | 128.41      |
| 2, 4   | 113.60                          | 113.48     | 115.57                            | 115.47      |
| 3      | 158.28                          | 157.87     | 159.5                             | 159.12      |
| 6      | 125.16                          | 125.14     | 124.8                             | 124.79      |
| 7      | 146.08                          | 143.45     | 149.16                            | 144.82      |
| 10     | 160.15                          | 166.16     | 161.08                            | 167.18      |
| 12     | 140.67                          | 141.31     | 140.49                            | 141.68      |
| 14, 15 | 119.86                          | 122.50     | 121.27                            | 122.92      |
| 13, 16 | 150.06                          | 148.92     | 150.07                            | 149.16      |

| H     | <i>trans</i> | <i>cis</i> | <i>majo</i> | <i>mino</i> |
|-------|--------------|------------|-------------|-------------|
| 19.22 | 7.73         | 7.66       | 7.81        | 7.6         |
| 20.21 | 6.87         | 6.78       | 6.88        | 6.8         |
| 23    | 7.82         | 7.44       | 8.37        | 8.01        |
| 25.28 | 8.72         | 8.74       | 8.78        | 8.72        |
| 26.27 | 7.57         | 7.55       | 7.6         | 7.35        |

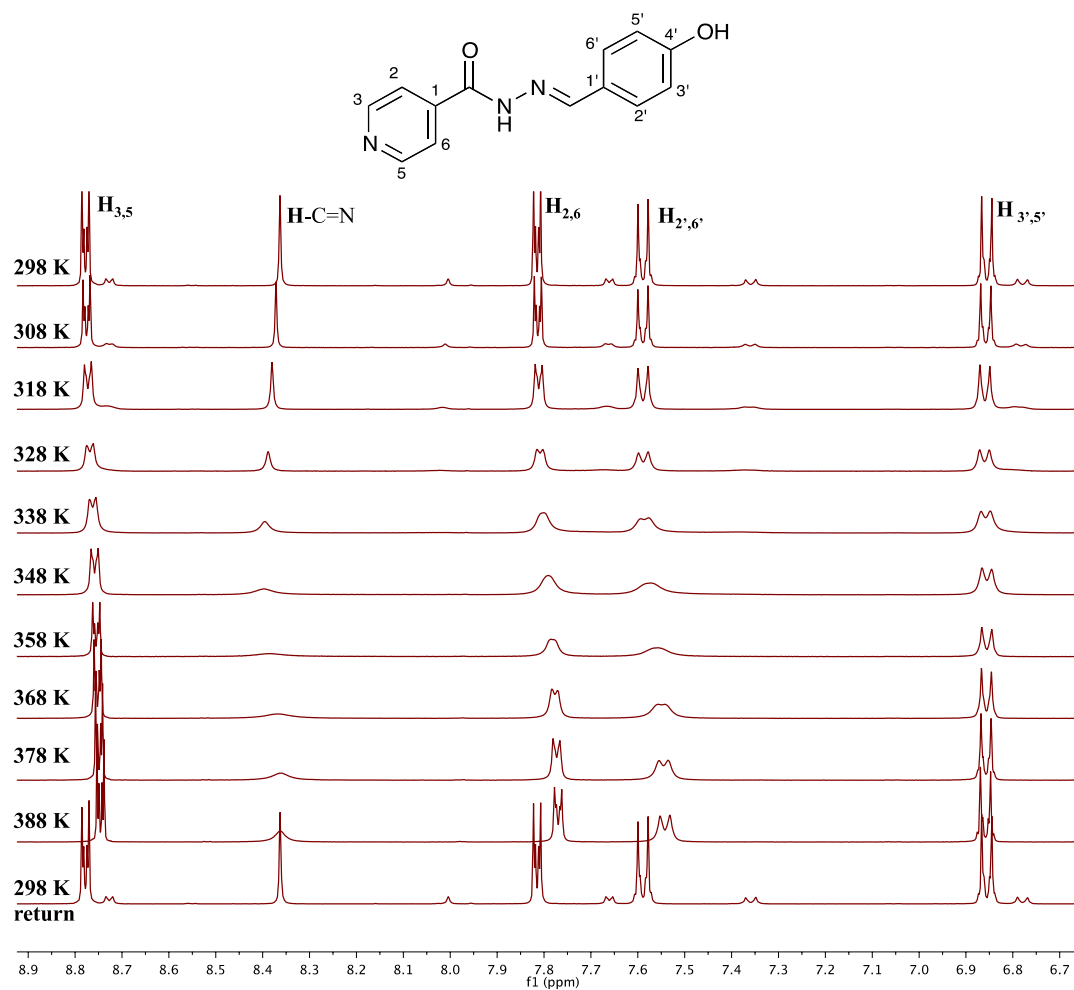

**Figure S1:**  $^1\text{H}$  NMR spectra at increasing temperature (298 to 388K and then return to 298K) of compound **1a**

**Table S3:** Determination of activation energy ( $\Delta G^\ddagger$ ) from coalescence temperatures  $T_c$  and rate exchange  $k_{exch}$  at different chemical shift for the **1a** isomers.

| Nuclei             | $T_c$ (K) | $k_{exch}$ (Hz) | $\Delta G^\ddagger$ (kcal/mol) |
|--------------------|-----------|-----------------|--------------------------------|
| H <sub>3,5</sub>   | 338       | 33.97           | 17.52                          |
| H-C=N              | 368       | 239.1           | 17.71                          |
| H <sub>2,6</sub>   | 352       | 102.6           | 17.50                          |
| H <sub>2',6'</sub> | 362       | 153.2           | 17.73                          |
| H <sub>3',5'</sub> | 342       | 51.28           | 17.45                          |

Mean value :  $\Delta G^\ddagger = 17.58 \text{ kcal.mol}^{-1}$

|                   | geometry                                                                            | E(HF)       | $\Delta E$ (kcal/mol) | %      |
|-------------------|-------------------------------------------------------------------------------------|-------------|-----------------------|--------|
| <i>transE_5_1</i> | 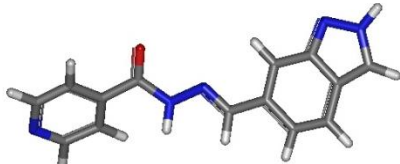   | -872,506656 | 2,57                  | 0,94   |
| <i>transE_5_2</i> |    | -872,508008 | 1,72                  | 3,94   |
| <i>transZ_5_1</i> |    | -872,501501 | 5,81                  | 0,004  |
| <i>transZ_5_2</i> |   | -872,500381 | 6,51                  | 0,001  |
| <i>cisE_5_1</i>   |  | -872,509651 | 0,69                  | 22,49  |
| <i>cisE_5_2</i>   |  | -872,510757 | 0                     | 72,54  |
| <i>cisZ_5_1</i>   |  | -872,504306 | 4,05                  | 0,078  |
| <i>cisZ_5_2</i>   |  | -872,49888  | 7,45                  | 0,0002 |

**Table S4:** Geometries and energies of minima for *cis* and *transE*-isomers of **5** obtained at the HF STO-3G level in the gas phase.

**Table S5:** Calculated and experimental  $^1\text{H}$  and  $^{13}\text{C}$  NMR chemical shifts in the DMSO, for *cis* and *trans E* isomers of **5** using the numbering of the modelling.

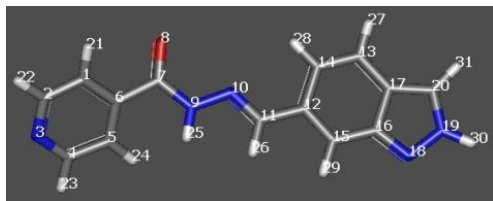

| <b>C</b> | <i>transE</i> | <i>cisE</i> | <i>majo</i> | <i>mino</i> |
|----------|---------------|-------------|-------------|-------------|
| 1        | 119.85        | 122.39      | 121.55      | 122.01      |
| 2        | 150.15        | 148.99      | 150.77      |             |
| 4        | 150.15        | 148.99      | 150.77      |             |
| 5        | 119.85        | 122.39      | 121.55      | 122.01      |
| 6        | 140.43        | 141.46      | 140.35      | 140.35      |
| 7        | 160.20        | 166.75      | 162.1       | 168.4       |
| 11       | 147.40        | 144.73      | 150.03      | 149.99      |
| 12       | 131.44        | 131.72      | 132.43      | 132.27      |
| 13       | 121.33        | 121.29      | 122.01      | 122.01      |
| 14       | 119.16        | 117.15      | 119.02      | 118.57      |
| 15       | 118.96        | 120.81      | 119.02      | 118.57      |
| 16       | 147.50        | 147.45      | 140.97      | 140.97      |
| 17       | 121.80        | 121.36      | 124.36      | 124.2       |
| 20       | 121.76        | 121.73      | 122.01      | 122.01      |

| <b>H</b> | <i>transE</i> | <i>cisE</i> | <i>majo</i> | <i>mino</i> |
|----------|---------------|-------------|-------------|-------------|
| 21       | 7.63          | 7.59        | 7.86        | 7.68        |
| 22       | 8.76          | 8.55        | 8.80        | 8.8         |
| 23       | 8.76          | 8.55        | 8.80        | 8.8         |
| 24       | 7.63          | 7.59        | 7.86        | 7.68        |
| 26       | 8.08          | 7.82        | 8.60        | 8.23        |
| 27       | 7.91          | 7.76        | 7.82        | 7.75        |
| 28       | 7.71          | 7.49        | 7.61        | 7.3         |
| 29       | 8.15          | 7.81        | 7.84        | 7.66        |
| 31       | 8.08          | 8.02        | 8.13        | 8.08        |

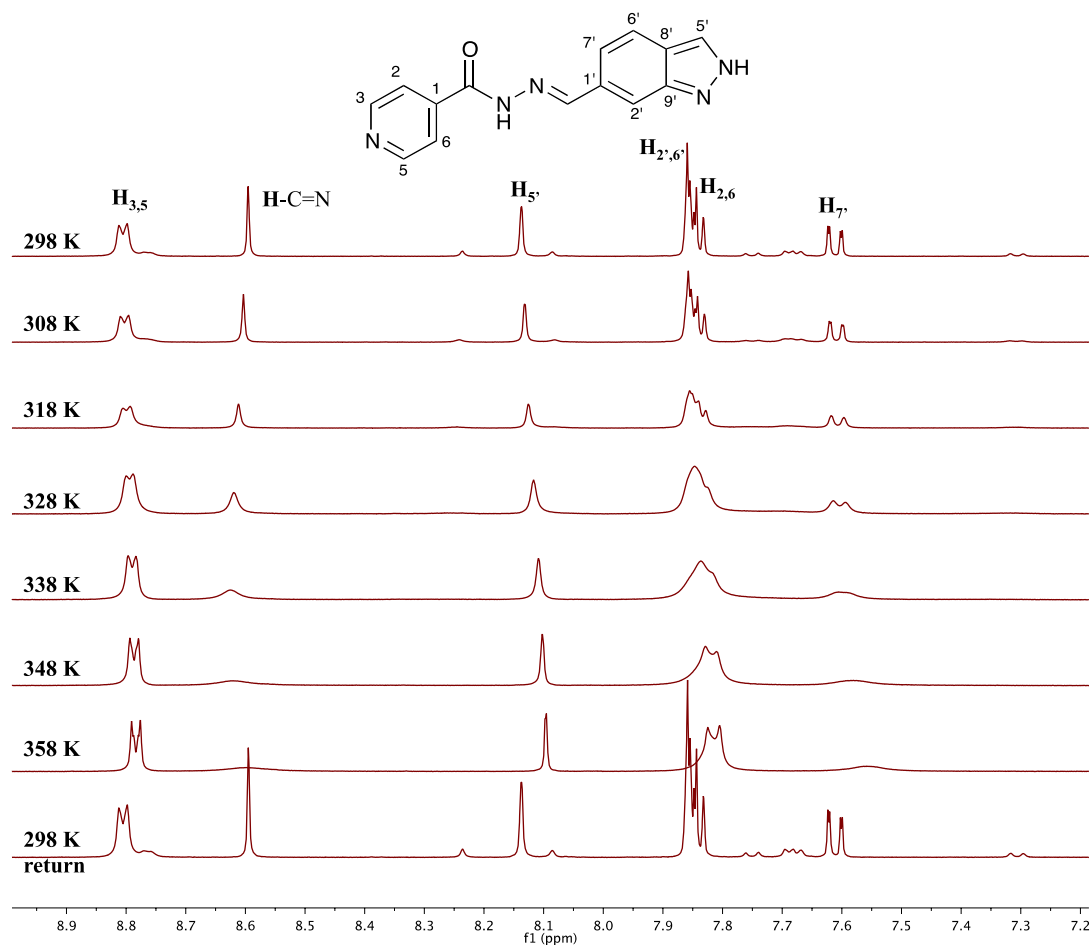

**Figure 2-SI:**  $^1\text{H}$  NMR spectra at increasing temperature (298 to 388K and then return to 298K) for **5**

**Table S6:** Determination of activation energy ( $\Delta G^\ddagger$ ) from coalescence temperatures  $T_c$  and rate exchange  $k_{exch}$  at different chemical shift for the isomers of **5**.

| Nuclei                            | $T_c$ (K) | $k_{exch}$ (Hz) | $\Delta G^\ddagger$ (kcal/mol) |
|-----------------------------------|-----------|-----------------|--------------------------------|
| $\text{H}_{3,5}$                  | 328       | 26.64           | 17.14                          |
| H-C=N                             | 358       | 239.76          | 17.20                          |
| $\text{H}_{5'}$                   | 338       | 35.30           | 17.49                          |
| $\text{H}_{2',6'}/\text{H}_{2,6}$ | 348       | 108.56          | 17.25                          |
| $\text{H}_{7'}$                   | 358       | 199.80          | 17.33                          |

Mean value:  $\Delta G^\ddagger = 17.28$  kcal/mol



**Figure S3:** Stability of compound **1d** in DMSO; A) From top to bottom: full-MS of compound **1d** upon overnight incubation in DMSO; compound **1d** freshly dissolved; INH dissolved in DMSO. B) Fragmentation pattern of the compounds (MS-MS (ESI)@cid30.0).

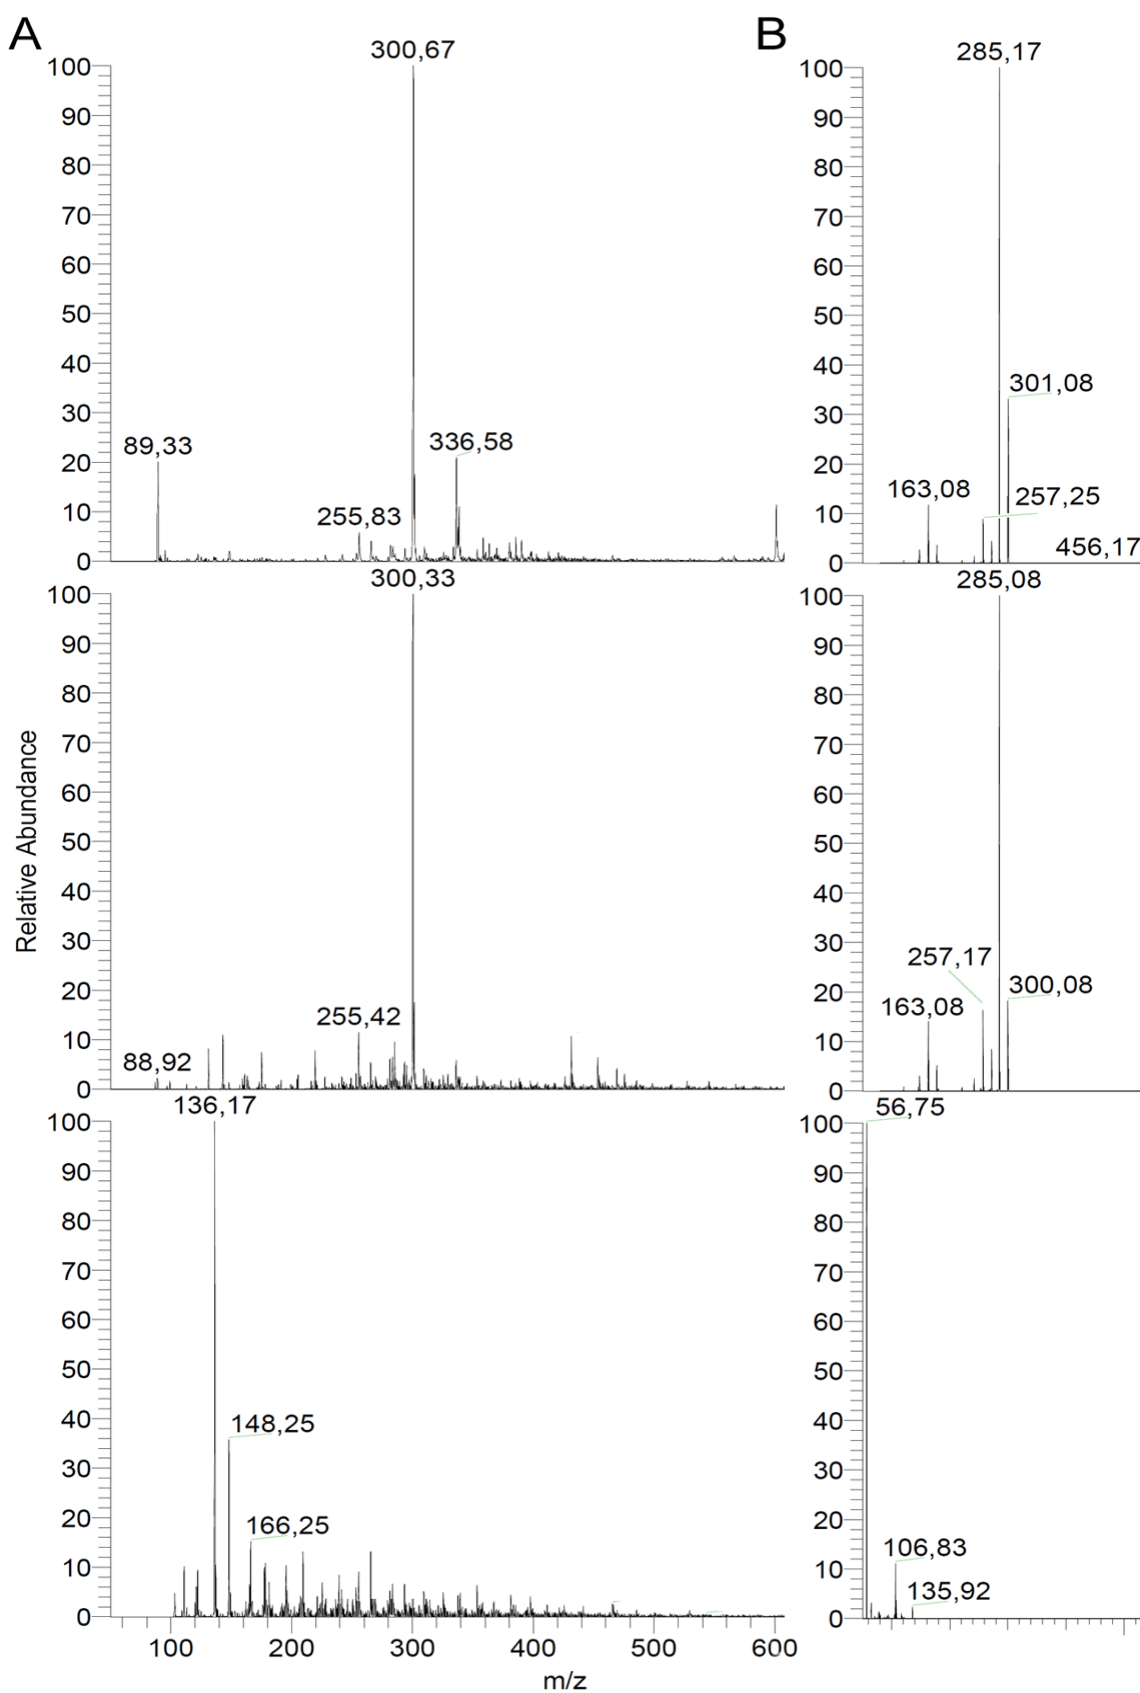

**Figure S4: a.** UV-*vis* spectra obtained for compound **1c** as function of pH variation.

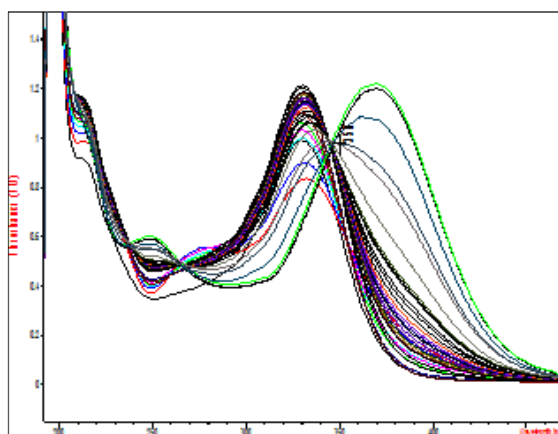

**Figure S4: b.** Plots of absorbance for 3 wavelength values ( $\lambda/\text{nm}$ ) as function of pH.

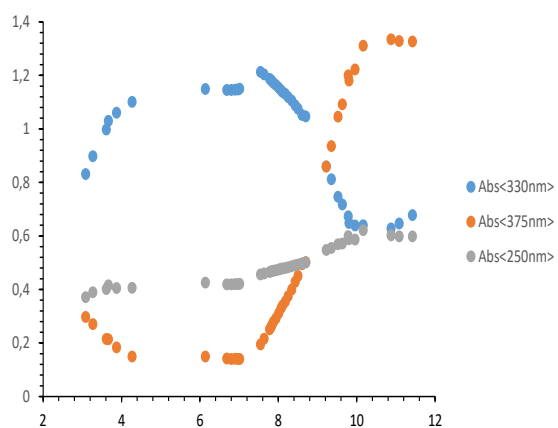

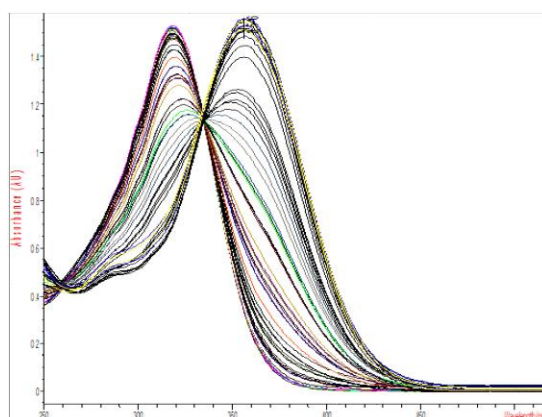

**Figure S5: a.** UV-*vis* spectra obtained for compound **1a** as function of pH variation.

**Figure S5: b.** Plots of absorbance for 3 wavelength values ( $\lambda/\text{nm}$ ) as function of pH.

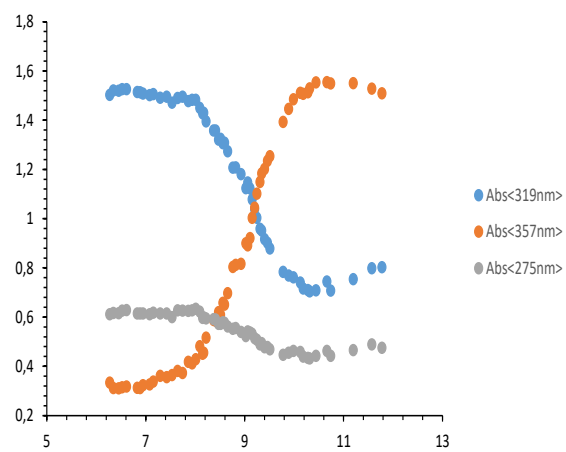

**Figure S6: a.** UV-*vis* spectra obtained for compound **1b** as function of pH variation.

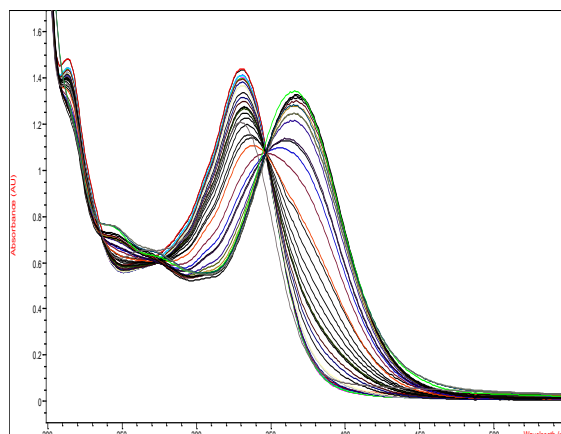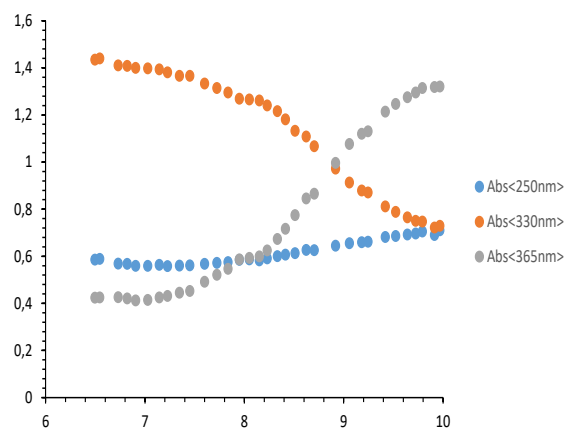

**Figure S6: b.** Plots of absorbance for 3 wavelength values ( $\lambda$ /nm) as function of pH

**Figure S7: a.** UV-*vis* spectra obtained for compound **5** as function of pH variation.

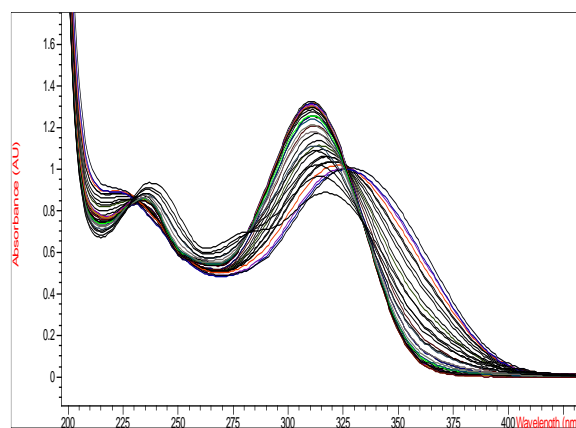

**Figure S7: b.** Plots of absorbance for 4 wavelength values ( $\lambda$ /nm) as function of pH

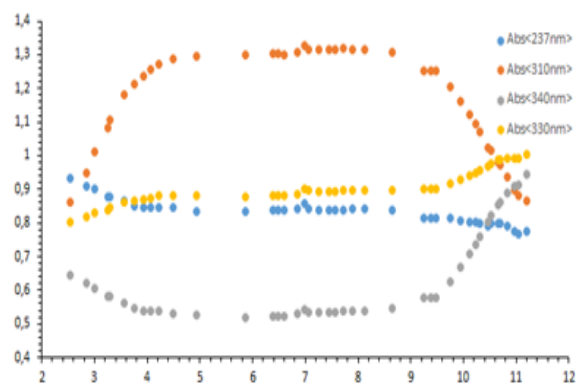

**Figure S8: a.** UV-*vis* spectra obtained for compound **7** as function of pH variation.

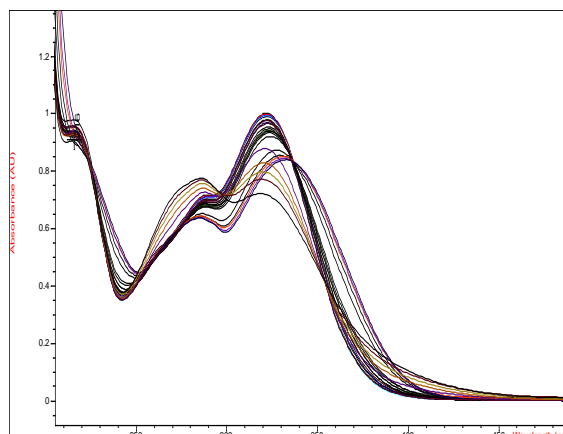

**Figure S8: b.** Plots of absorbance for 4 wavelength values ( $\lambda$ /nm) as function of pH

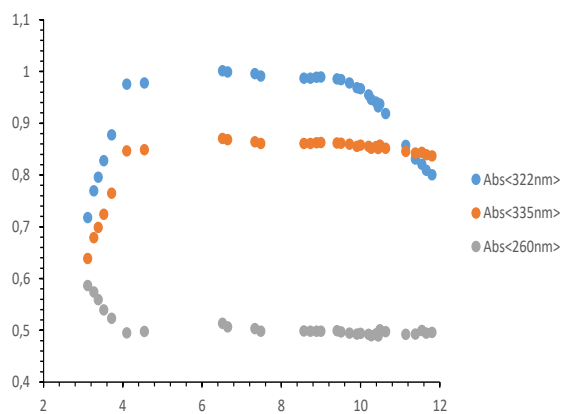

## Elemental Composition Report

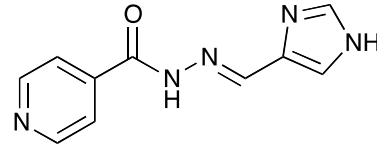

### Single Mass Analysis

Tolerance = 3.0 PPM / DBE: min = -1.5, max = 80.0

Element prediction: Off

Number of isotope peaks used for i-FIT = 3

Monoisotopic Mass, Even Electron Ions

225 formula(e) evaluated with 1 results within limits (up to 20 closest results for each mass)

Elements Used:

C: 0-50 H: 0-100 N: 0-10 O: 0-10

Cone voltage = 30 V

XEVO-G2QTOF#YCA210

17-Jan-2017 10:01:44

ISO-1 50 (0.499) AM2 (Ar,14000.0,0.00,0.00); Cm (47:59-31:38x2.000)

1: TOF MS ES+

2.80e+006

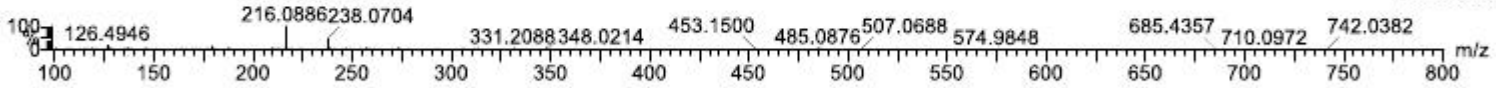

Minimum: -1.5  
Maximum: 1.0 3.0 80.0

| Mass     | Calc. Mass | mDa | PPM | DBE | i-FIT | Norm | Conf (%) | Formula      |
|----------|------------|-----|-----|-----|-------|------|----------|--------------|
| 216.0886 | 216.0885   | 0.1 | 0.5 | 8.5 | 691.3 | n/a  | n/a      | C10 H10 N5 O |

Cone voltage = 30 V

XEVO-G2QTOF#YCA210

17-Jan-2017 10:01:44

ISO-1 50 (0.499) AM2 (Ar,14000.0,0.00,0.00); Cm (47:59-31:38x2.000)

1: TOF MS ES+

2.80e6

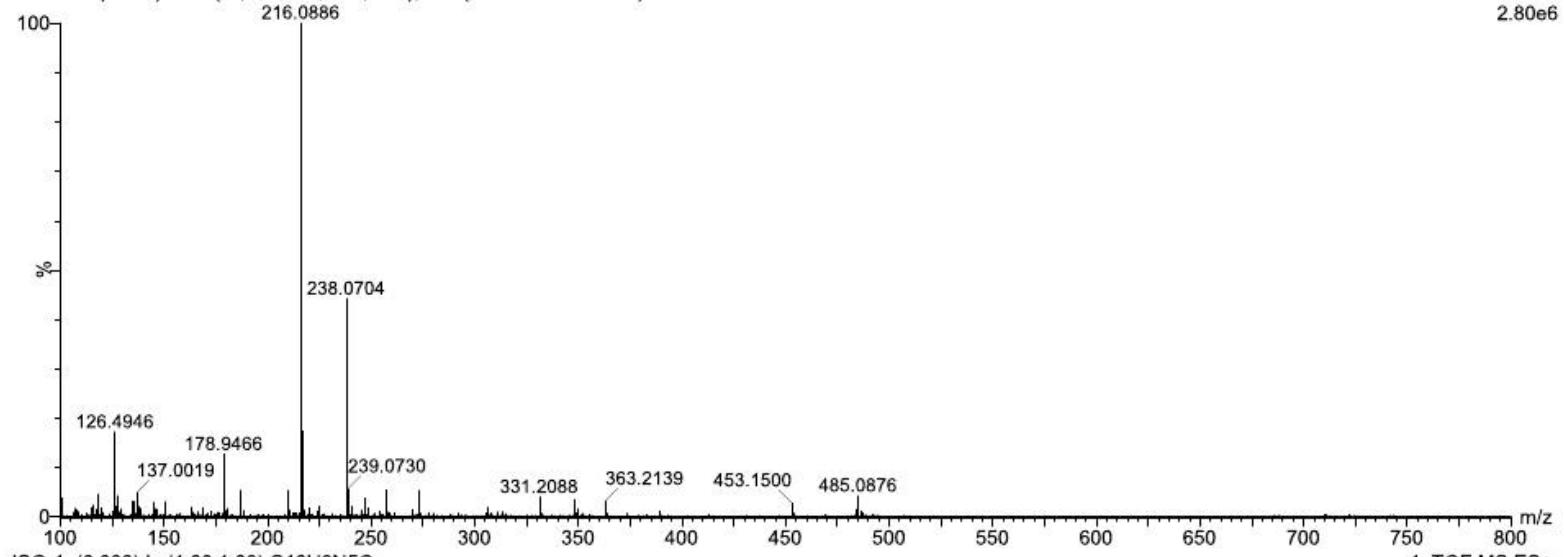

ISO-1 (0.033) Is (1.00,1.00) C10H9N5O

1: TOF MS ES+

8.79e12

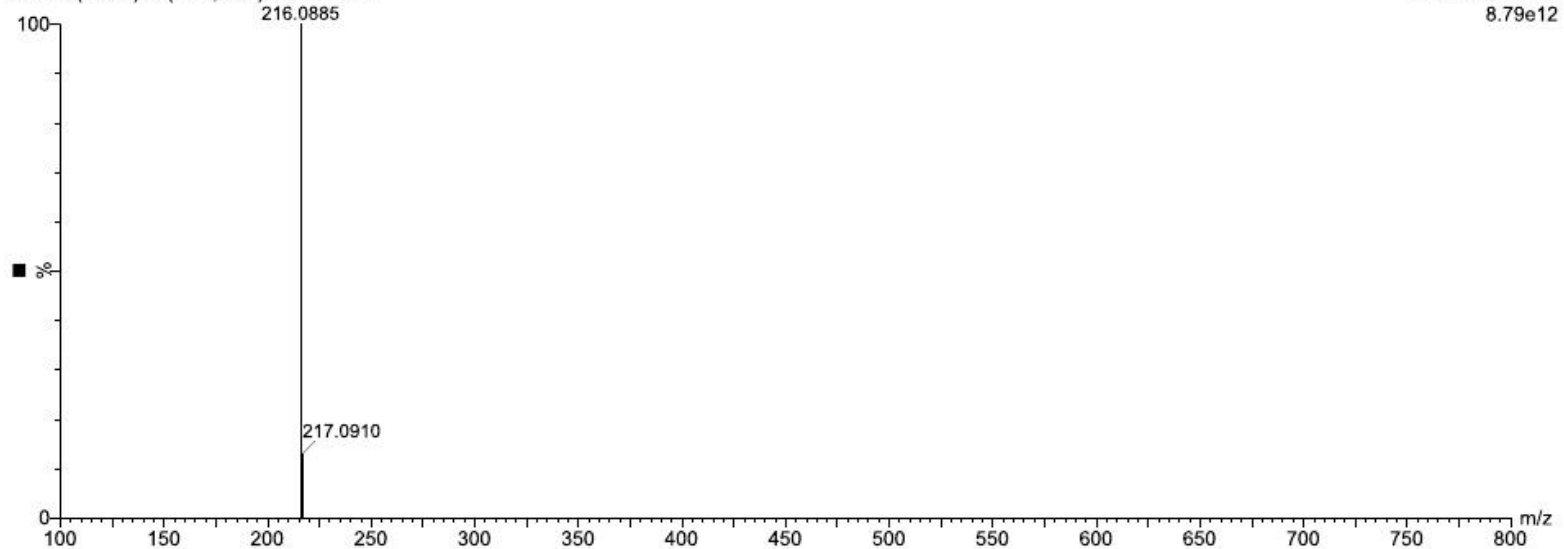

Single Mass Analysis

Tolerance = 3.0 PPM / DBE: min = -1.5, max = 50.0

Element prediction: Off

Number of isotope peaks used for i-FIT = 3

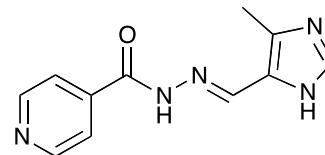

Monoisotopic Mass, Even Electron Ions

321 formula(e) evaluated with 1 results within limits (up to 50 best isotopic matches for each mass)

Elements Used:

C: 0-50 H: 0-100 N: 0-10 O: 0-10

30  
ISO 2C 75 (0.493) AM2 (Ar,14000.0,0.00,0.00); Cm (66:75-34:46x2.000)

1: TOF MS ES+  
1.66e+006

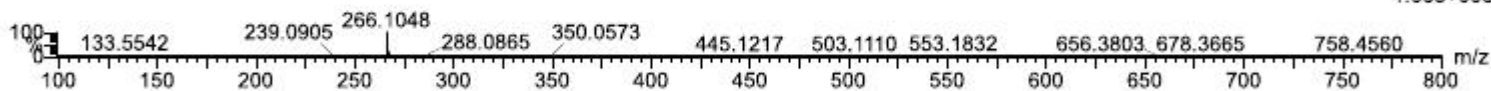

Minimum: -1.5  
Maximum: 1.0 3.0 50.0

| Mass     | Calc. Mass | mDa | PPM | DBE  | i-FIT | Norm | Conf (%) | Formula      |
|----------|------------|-----|-----|------|-------|------|----------|--------------|
| 266.1048 | 266.1042   | 0.6 | 2.3 | 11.5 | 431.7 | n/a  | n/a      | C14 H12 N5 O |

30  
ISO 2C 75 (0.493) AM2 (Ar,14000.0,0.00,0.00); Cm (66:75-34:46x2.000)

1: TOF MS ES+  
1.66e06

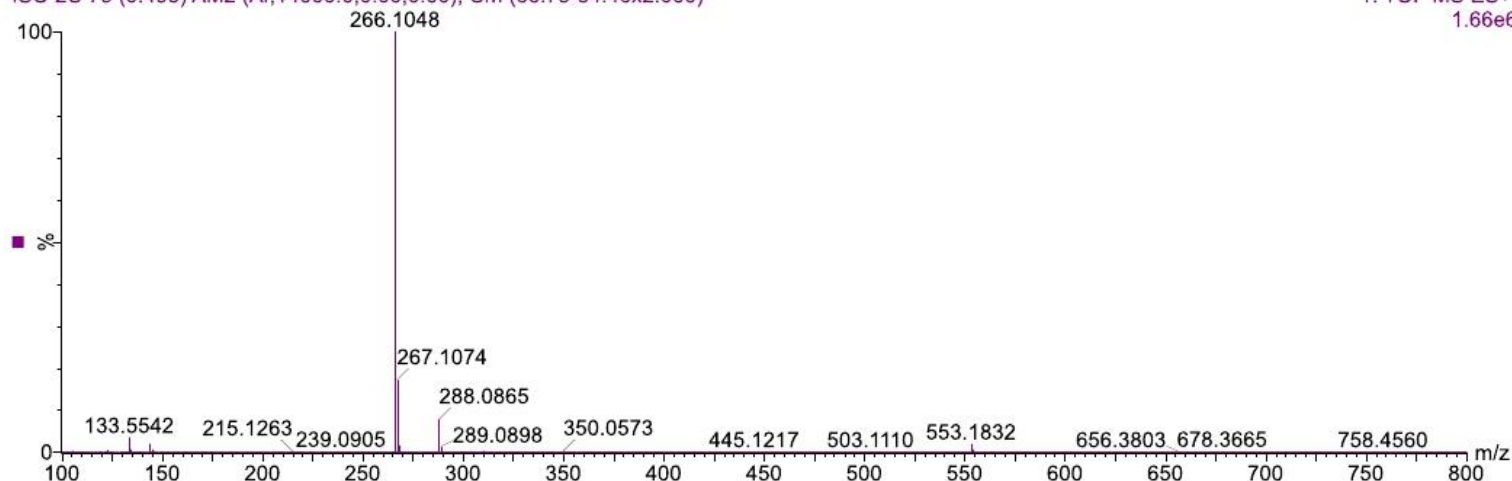

ISO 2C (0.031) Is (1.00,1.00) C14H11N5O  
1: TOF MS ES+  
8.42e12

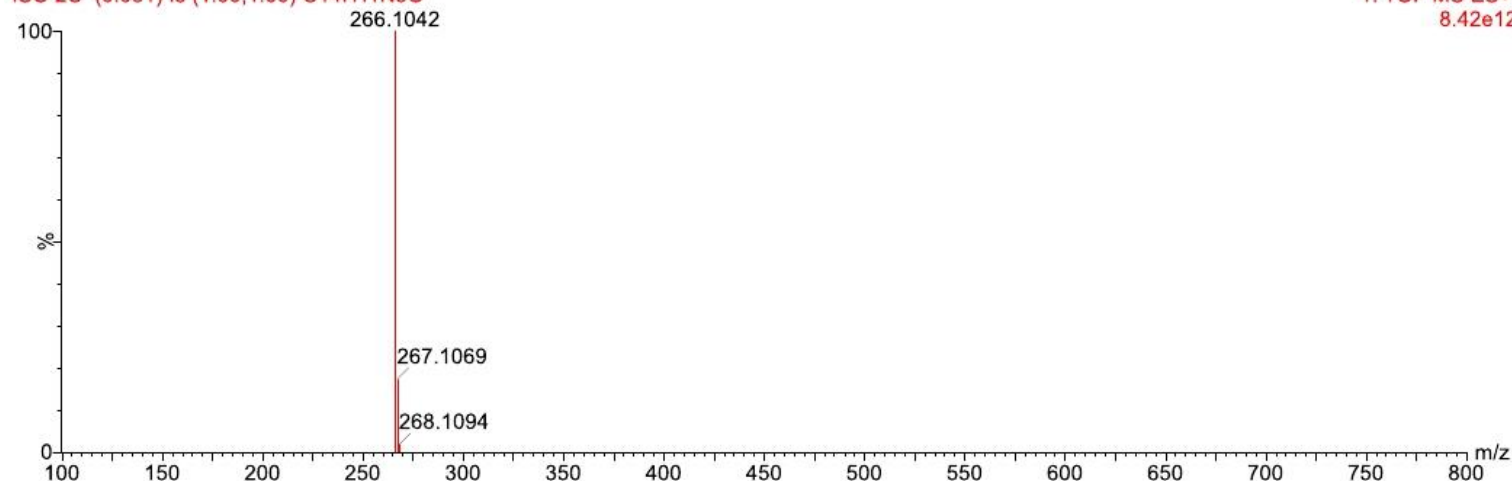



Single Mass Analysis

Tolerance = 3.0 PPM / DBE: min = -1.5, max = 50.0

Element prediction: Off

Number of isotope peaks used for i-FIT = 3

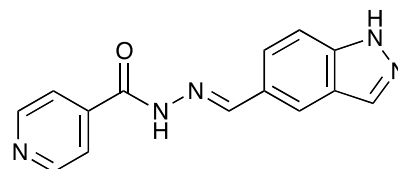

Monoisotopic Mass, Even Electron Ions

321 formula(e) evaluated with 1 results within limits (up to 50 best isotopic matches for each mass)

Elements Used:

C: 0-50 H: 0-100 N: 0-10 O: 0-10

30  
ISO 3C 80 (0.521) AM2 (Ar,14000.0,0.00,0.00); Cm (72:101)

1: TOF MS ES+  
4.17e+006

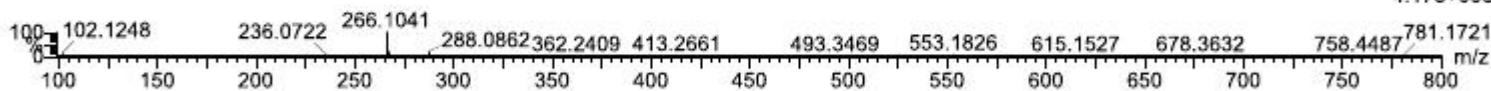

Minimum: -1.5  
Maximum: 1.0 3.0 50.0

| Mass     | Calc. Mass | mDa  | PPM  | DBE  | i-FIT | Norm | Conf(%) | Formula      |
|----------|------------|------|------|------|-------|------|---------|--------------|
| 266.1041 | 266.1042   | -0.1 | -0.4 | 11.5 | 586.7 | n/a  | n/a     | C14 H12 N5 O |

30

ISO 3C 80 (0.521) AM2 (Ar,14000.0,0.00,0.00); Cm (72:101)

1: TOF MS ES+  
4.17e6

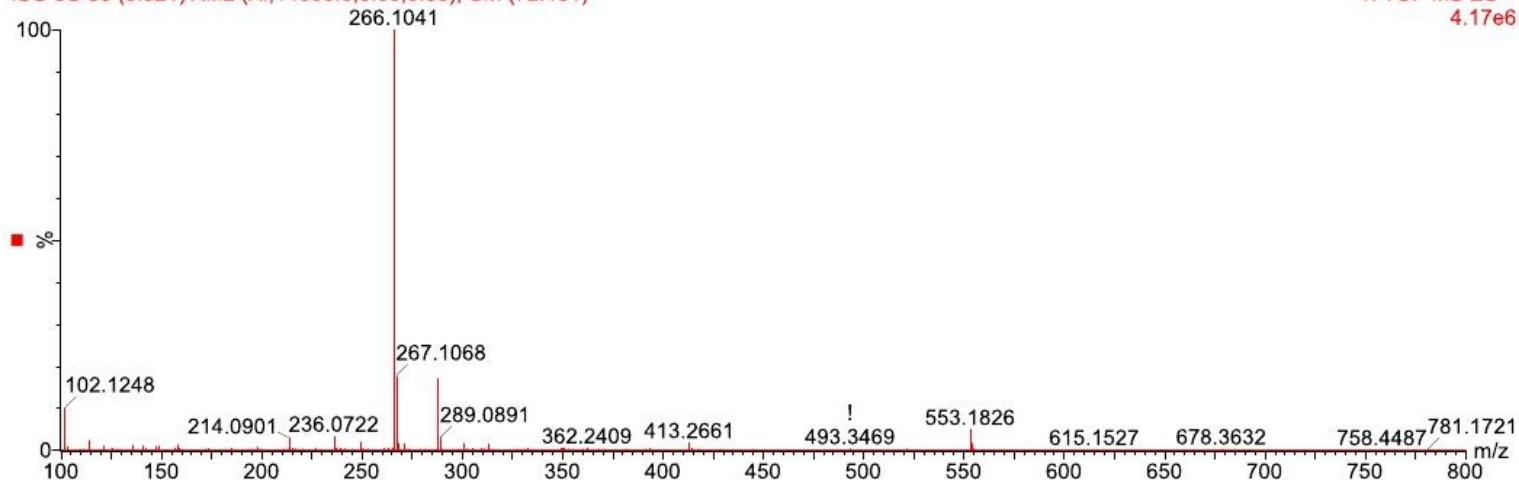

ISO 3C (0.031) Is (1.00,1.00) C14H11N5O

1: TOF MS ES+  
8.42e12

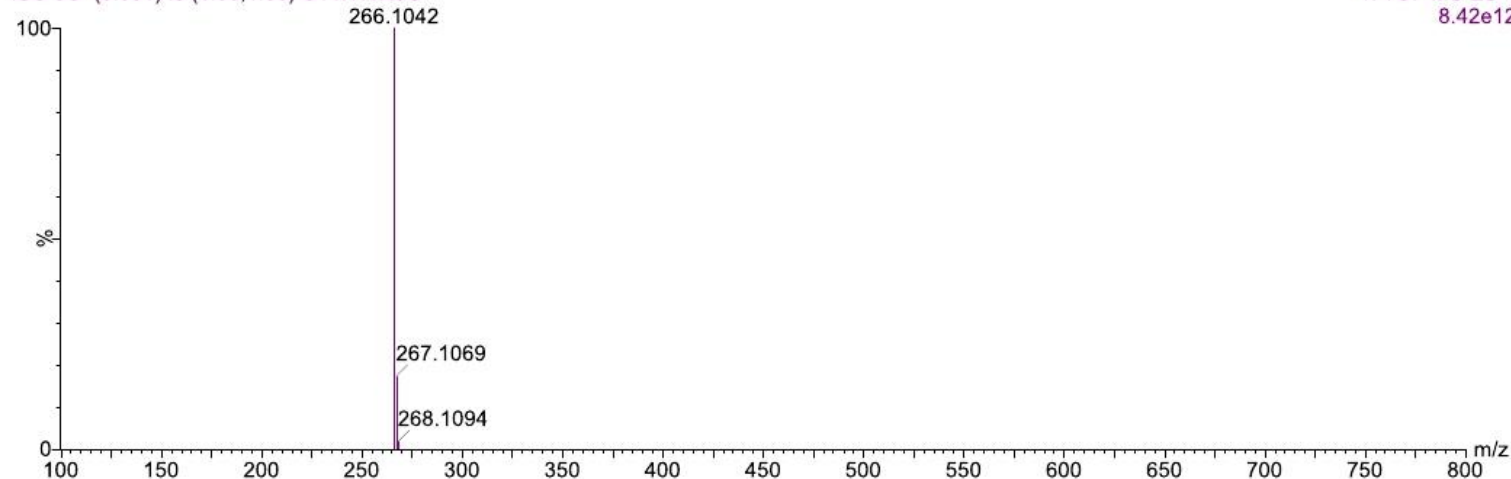

## Single Mass Analysis

Tolerance = 3.0 PPM / DBE: min = -1.5, max = 50.0

Element prediction: Off

Number of isotope peaks used for i-FIT = 3

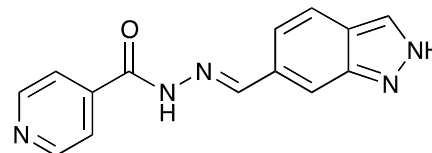

Monoisotopic Mass, Even Electron Ions

321 formula(e) evaluated with 1 results within limits (up to 50 best isotopic matches for each mass)

Elements Used:

C: 0-50 H: 0-100 N: 0-10 O: 0-10

30

ISO 4C 81 (0.526) AM2 (Ar,14000.0,0.00,0.00); Cm (74:89)

1: TOF MS ES+  
1.88e+007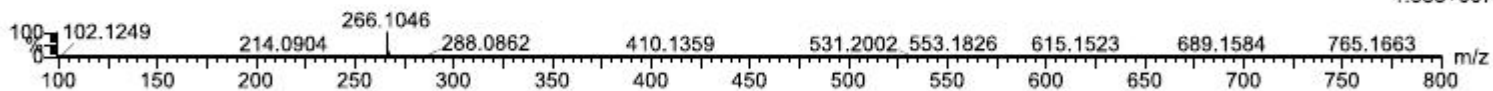

Minimum: -1.5  
Maximum: 1.0 3.0 50.0

| Mass     | Calc. Mass | mDa | PPM | DBE  | i-FIT | Norm | Conf(%) | Formula      |
|----------|------------|-----|-----|------|-------|------|---------|--------------|
| 266.1046 | 266.1042   | 0.4 | 1.5 | 11.5 | 721.2 | n/a  | n/a     | C14 H12 N5 O |

30

ISO 4C 81 (0.526) AM2 (Ar,14000.0,0.00,0.00); Cm (74:89)

1: TOF MS ES+  
1.88e7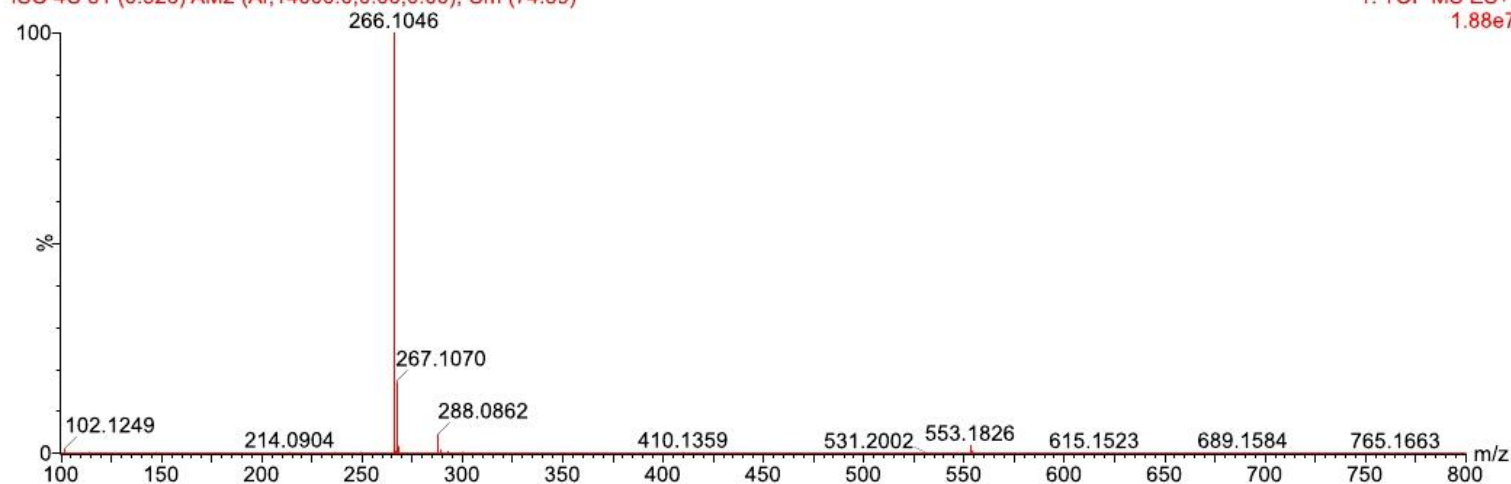

ISO 4C (0.031) Is (1.00,1.00) C14H11N5O

1: TOF MS ES+  
8.42e12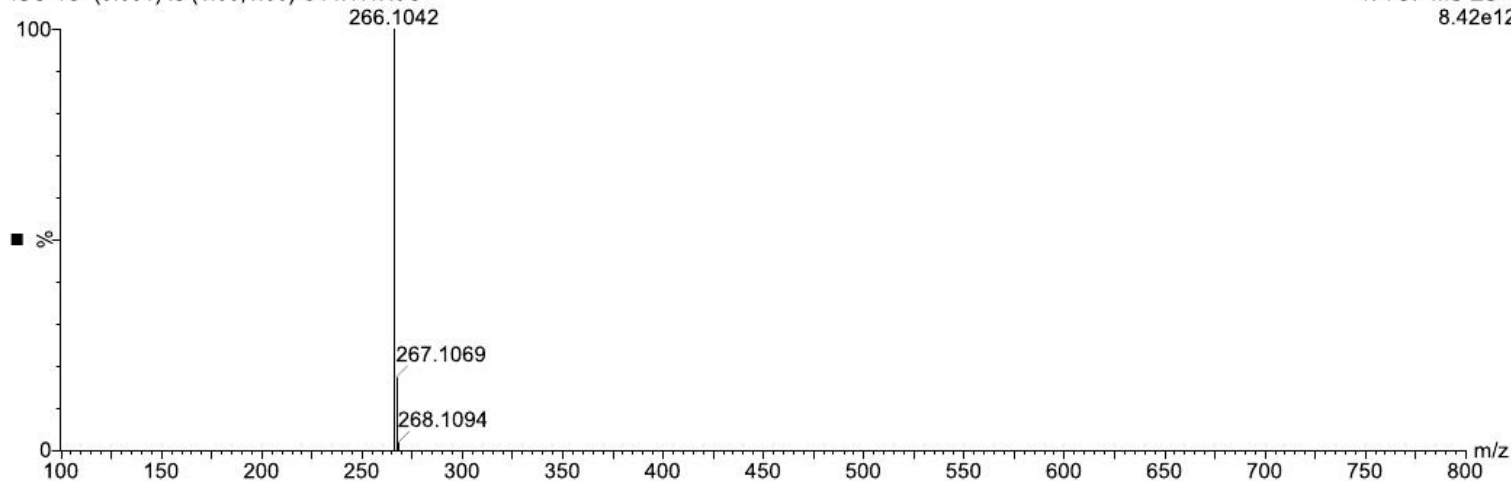

## Single Mass Analysis

Tolerance = 3.0 PPM / DBE: min = -1.5, max = 50.0

Element prediction: Off

Number of isotope peaks used for i-FIT = 3

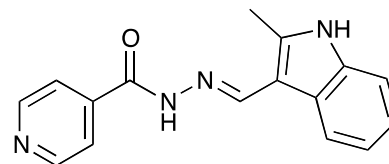

Monoisotopic Mass, Even Electron Ions

352 formula(e) evaluated with 1 results within limits (up to 50 best isotopic matches for each mass)

Elements Used:

C: 0-50 H: 0-100 N: 0-10 O: 0-10

30

ISO 5C 80 (0.521) AM2 (Ar,14000.0,0.00,0.00); Cm (77:91)

1: TOF MS ES+  
1.18e+007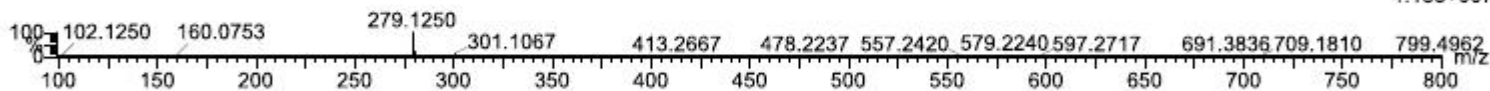

Minimum: -1.5  
Maximum: 1.0 3.0 50.0

| Mass     | Calc. Mass | mDa | PPM | DBE  | i-FIT | Norm | Conf(%) | Formula      |
|----------|------------|-----|-----|------|-------|------|---------|--------------|
| 279.1250 | 279.1246   | 0.4 | 1.4 | 11.5 | 701.7 | n/a  | n/a     | C16 H15 N4 O |

30

ISO 5C 80 (0.521) AM2 (Ar,14000.0,0.00,0.00); Cm (77:91)

1: TOF MS ES+  
1.18e7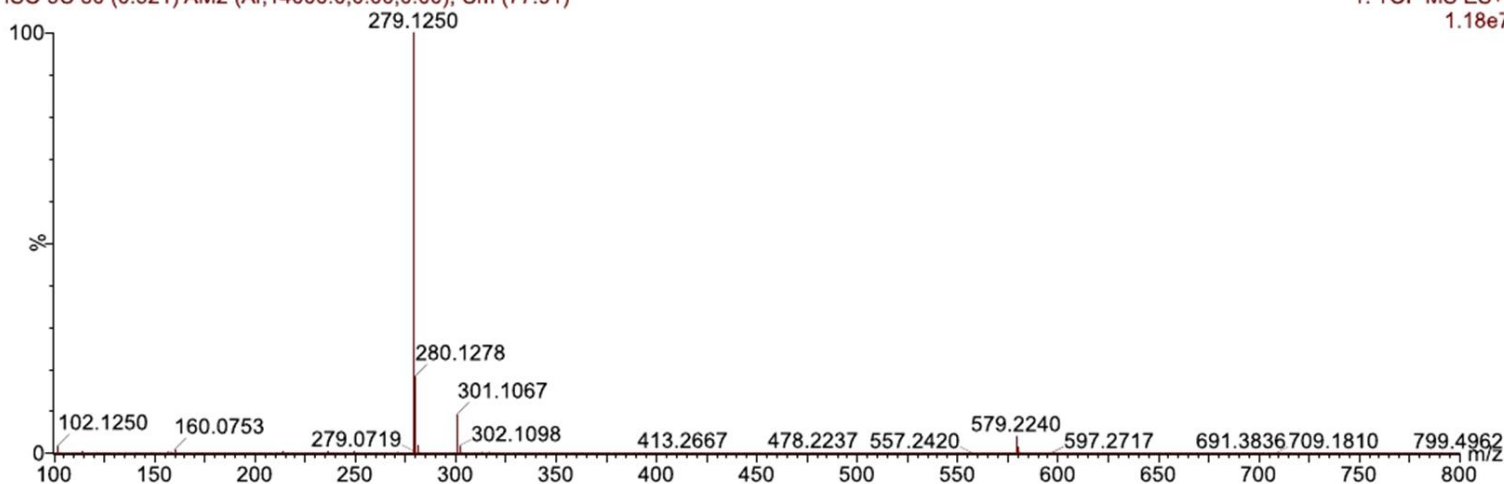

ISO 5C (0.031) Is (1.00,1.00) C16H14N4O

1: TOF MS ES+  
8.26e12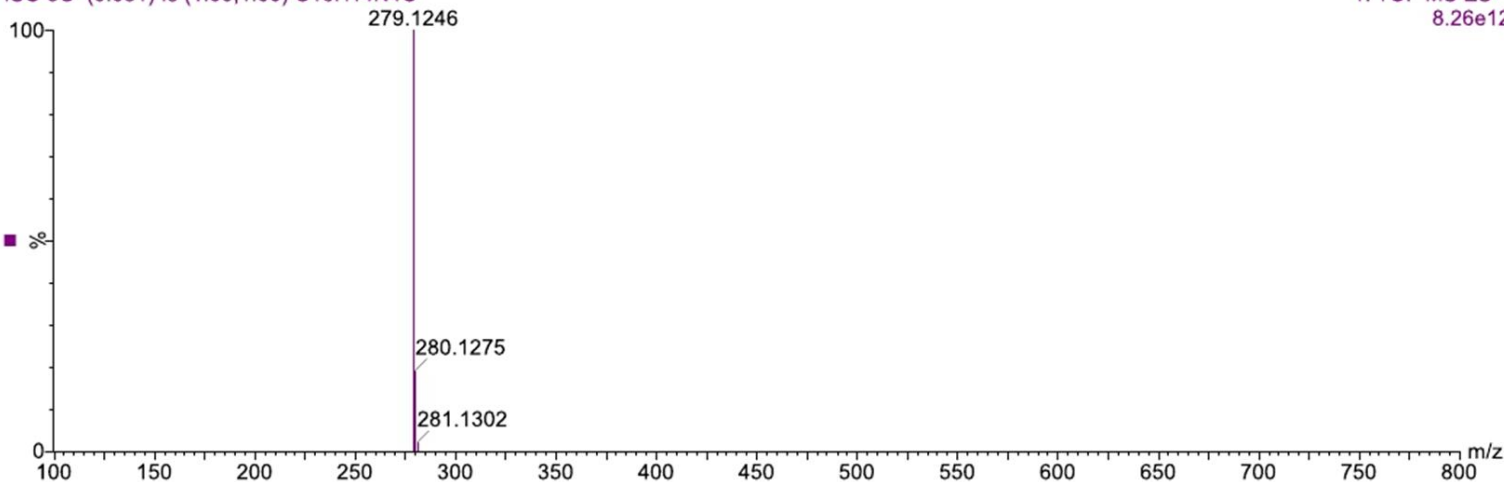

## Single Mass Analysis

Tolerance = 3.0 PPM / DBE: min = -1.5, max = 50.0

Element prediction: Off

Number of isotope peaks used for i-FIT = 3

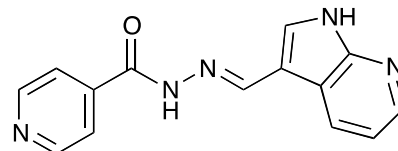

Monoisotopic Mass, Even Electron Ions

248 formula(e) evaluated with 1 results within limits (up to 50 best isotopic matches for each mass)

Elements Used:

C: 0-50 H: 0-100 N: 0-10 O: 0-10

30

ISO 6C 77 (0.504) AM2 (Ar,14000.0,0.00,0.00); Cm (71:90-9:51x2.000)

1: TOF MS ES+  
1.34e+006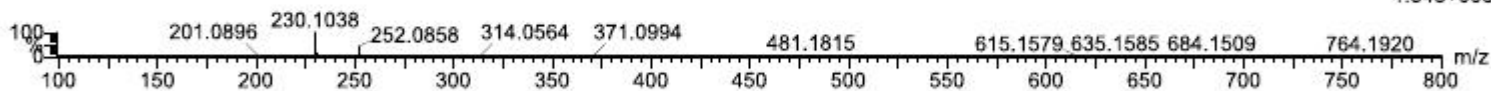

Minimum: -1.5  
Maximum: 1.0 3.0 50.0

| Mass     | Calc. Mass | mDa  | PPM  | DBE | i-FIT | Norm | Conf(%) | Formula      |
|----------|------------|------|------|-----|-------|------|---------|--------------|
| 230.1038 | 230.1042   | -0.4 | -1.7 | 8.5 | 370.9 | n/a  | n/a     | C11 H12 N5 O |

30

ISO 6C 77 (0.504) AM2 (Ar,14000.0,0.00,0.00); Cm (71:90-9:51x2.000)

1: TOF MS ES+  
1.34e6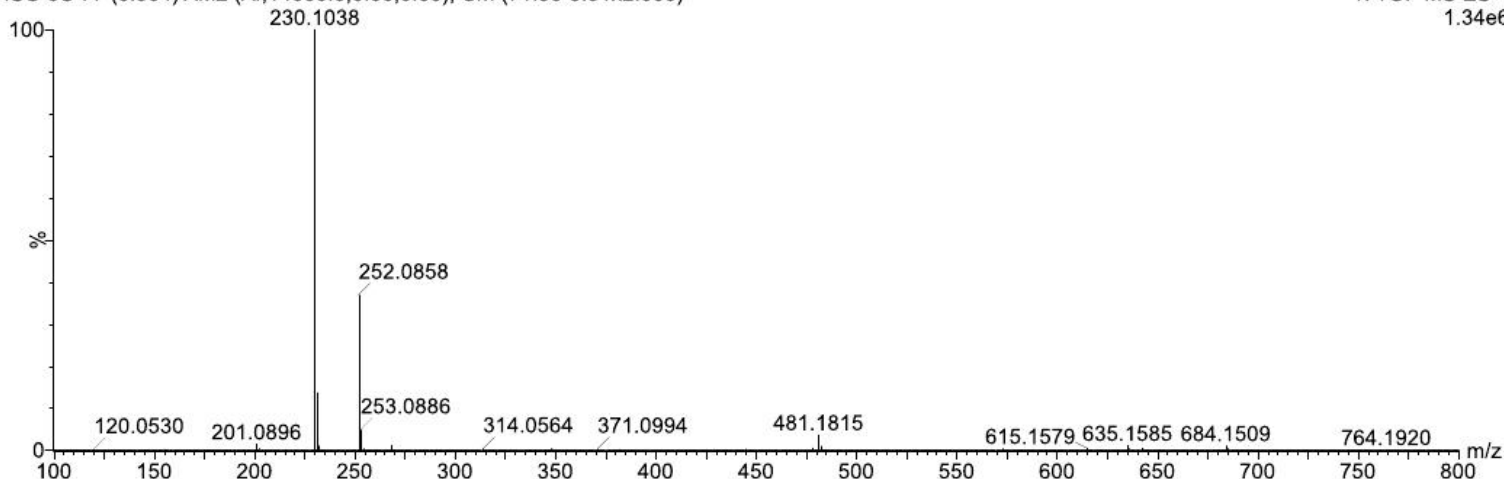

ISO 6C (0.031) Is (1.00,1.00) C11H11N5O

1: TOF MS ES+  
8.69e12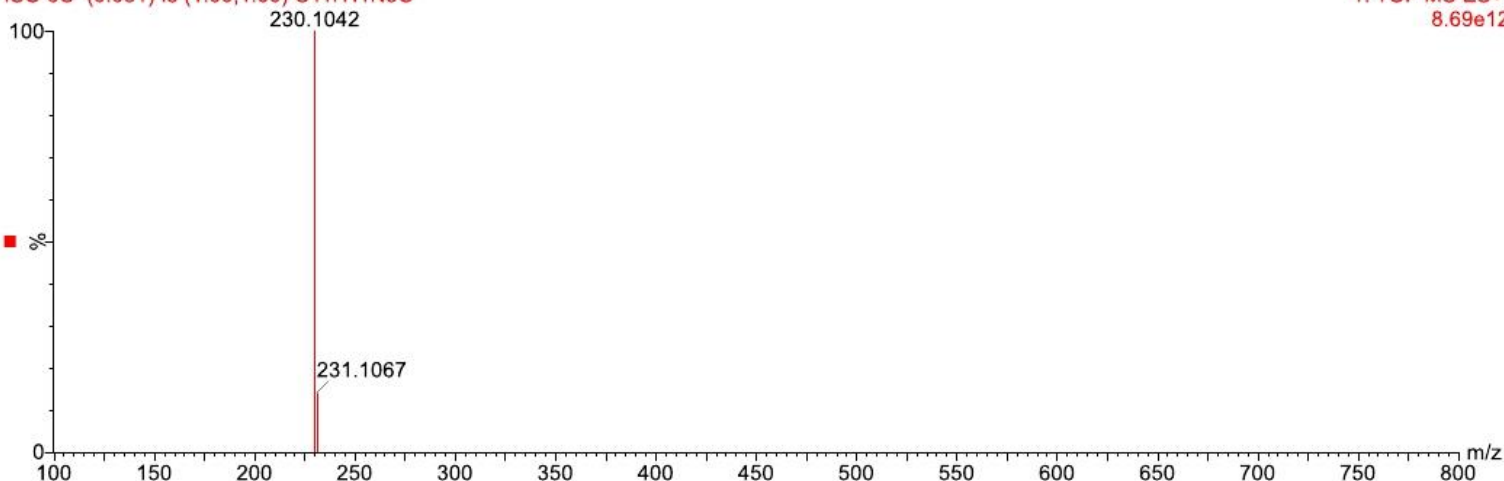

## Single Mass Analysis

Tolerance = 3.0 PPM / DBE: min = -1.5, max = 50.0

Element prediction: Off

Number of isotope peaks used for i-FIT = 3

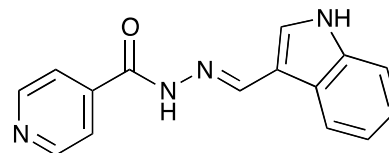

Monoisotopic Mass, Even Electron Ions

327 formula(e) evaluated with 1 results within limits (up to 50 best isotopic matches for each mass)

Elements Used:

C: 0-50 H: 0-100 N: 0-10 O: 0-10

30

ISO 7C 80 (0.521) AM2 (Ar,14000.0,0.00,0.00); Cm (71:96)

1: TOF MS ES+

1.71e+007

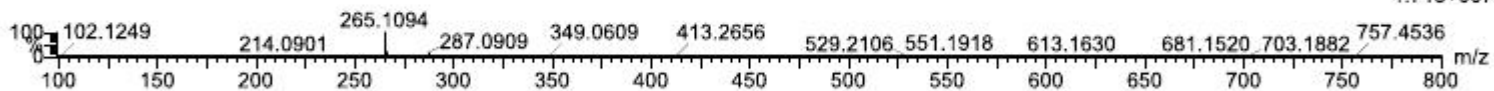

Minimum: -1.5  
Maximum: 1.0 3.0 50.0

| Mass     | Calc. Mass | mDa | PPM | DBE  | i-FIT | Norm | Conf(%) | Formula      |
|----------|------------|-----|-----|------|-------|------|---------|--------------|
| 265.1094 | 265.1089   | 0.5 | 1.9 | 11.5 | 703.6 | n/a  | n/a     | C15 H13 N4 O |

30

ISO 7C 80 (0.521) AM2 (Ar,14000.0,0.00,0.00); Cm (71:96)

1: TOF MS ES+

1.71e7

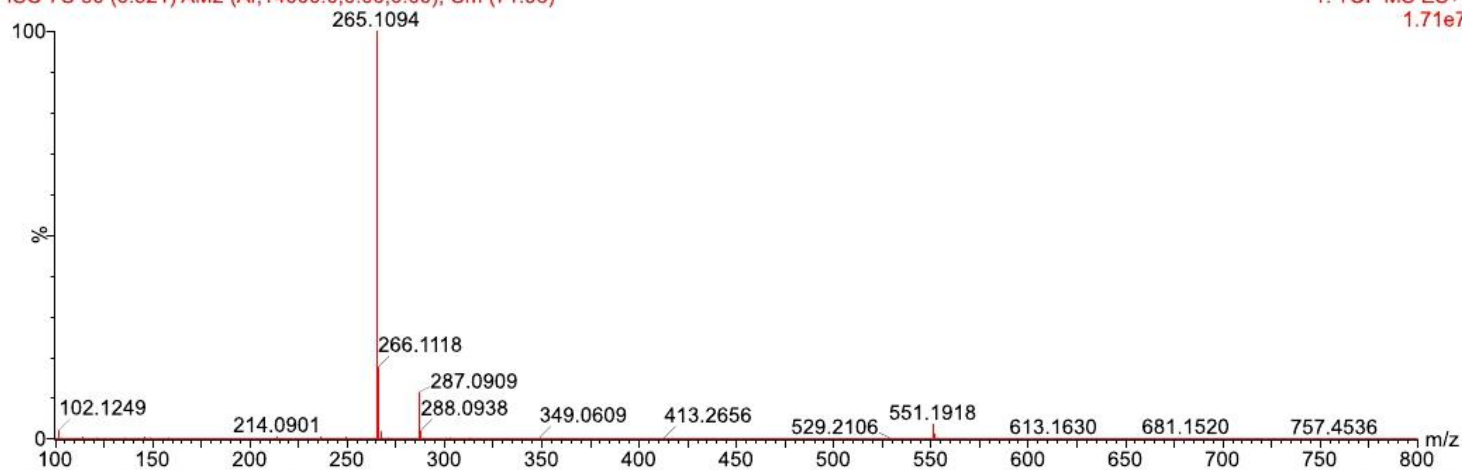

ISO 7C (0.031) Is (1.00,1.00) C15H12N4O

1: TOF MS ES+

8.35e12

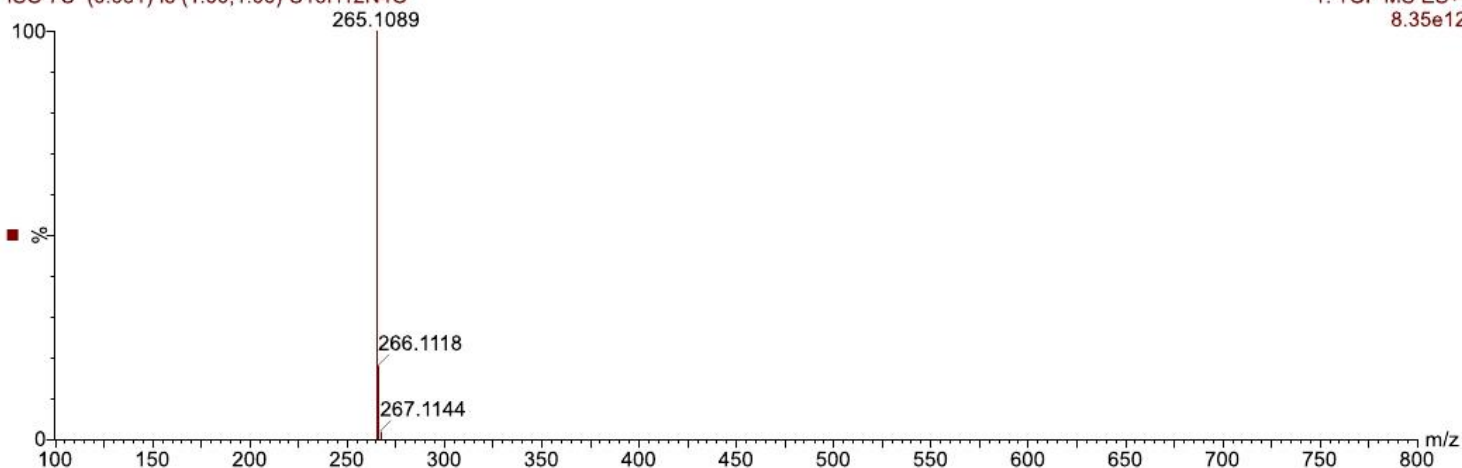

## Single Mass Analysis

Tolerance = 3.0 PPM / DBE: min = -1.5, max = 50.0

Element prediction: Off

Number of isotope peaks used for i-FIT = 3

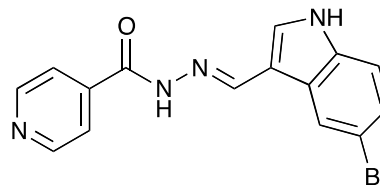

Monoisotopic Mass, Even Electron Ions

759 formula(e) evaluated with 3 results within limits (up to 50 best isotopic matches for each mass)

Elements Used:

C: 0-50 H: 0-100 N: 0-10 O: 0-10 Br: 0-1

30

ISO 8C 78 (0.510) AM2 (Ar,14000.0,0.00,0.00); Cm (74:96-4:55x2.000)

1: TOF MS ES+  
1.90e+005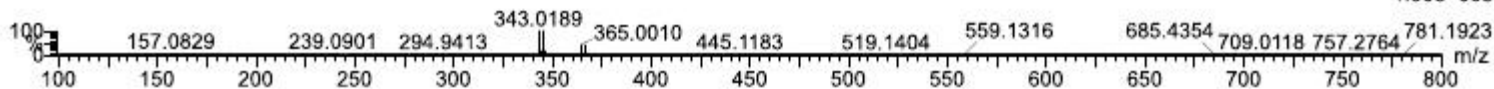

Minimum: -1.5  
Maximum: 1.0 3.0 50.0

| Mass     | Calc. Mass | mDa  | PPM  | DBE  | i-FIT | Norm   | Conf (%) | Formula         |
|----------|------------|------|------|------|-------|--------|----------|-----------------|
| 343.0189 | 343.0181   | 0.8  | 2.3  | 6.5  | 185.7 | 0.075  | 92.78    | C14 H16 O5 Br   |
|          | 343.0194   | -0.5 | -1.5 | 11.5 | 188.3 | 2.628  | 7.22     | C15 H12 N4 O Br |
|          | 343.0184   | 0.5  | 1.5  | 26.5 | 212.0 | 26.401 | 0.00     | C27 H3 O        |

30

ISO 8C 78 (0.510) AM2 (Ar,14000.0,0.00,0.00); Cm (74:96-4:55x2.000)

1: TOF MS ES+  
1.90e5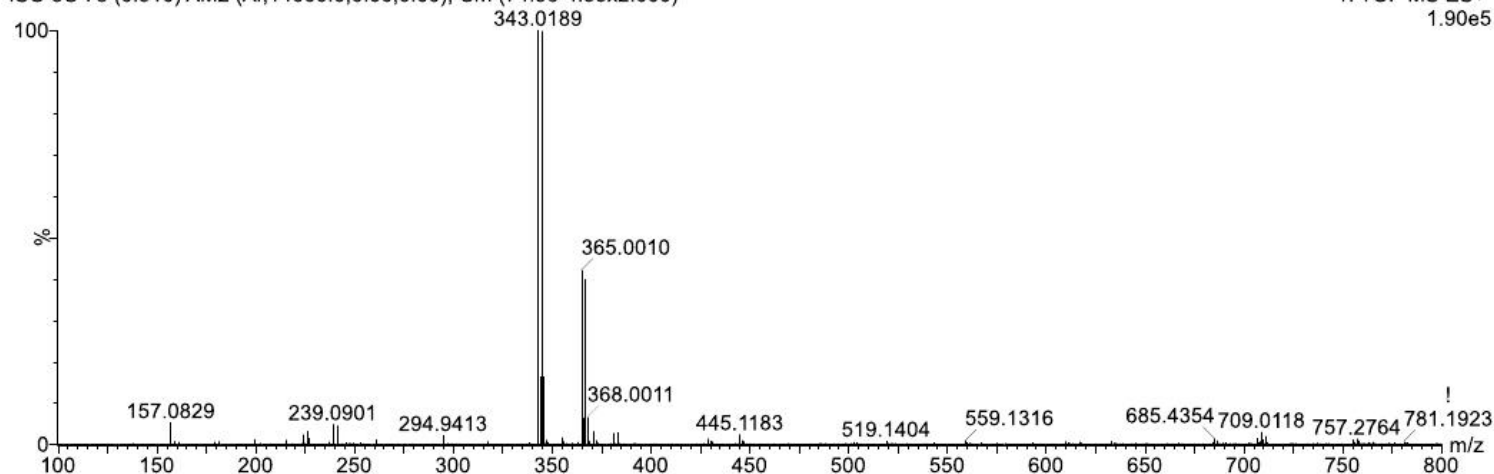

ISO 8C (0.031) Is (1.00,1.00) C15H11N4OBr

1: TOF MS ES+  
4.24e12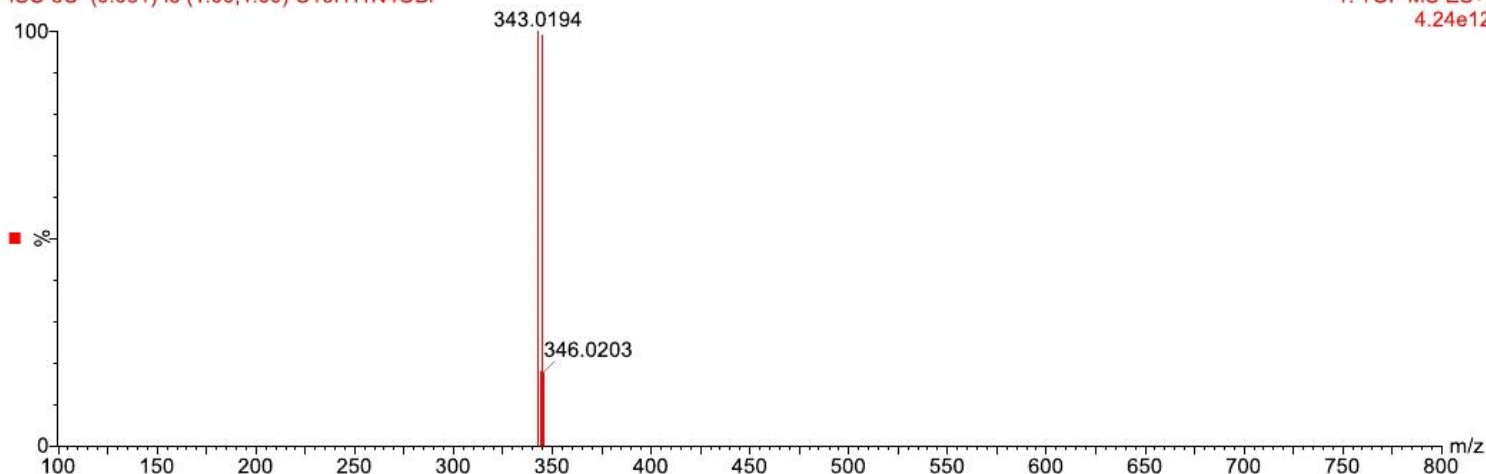

Single Mass Analysis

Tolerance = 3.0 PPM / DBE: min = -1.5, max = 50.0

Element prediction: Off

Number of isotope peaks used for i-FIT = 3

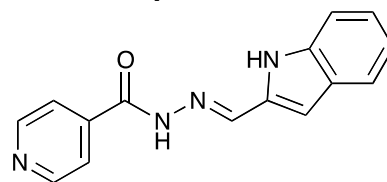

Monoisotopic Mass, Even Electron Ions

327 formula(e) evaluated with 1 results within limits (up to 50 best isotopic matches for each mass)

Elements Used:

C: 0-50 H: 0-100 N: 0-10 O: 0-10

30

ISO 9C 79 (0.515) AM2 (Ar,14000.0,0.00,0.00); Cm (71:94)

1: TOF MS ES+  
6.52e+006

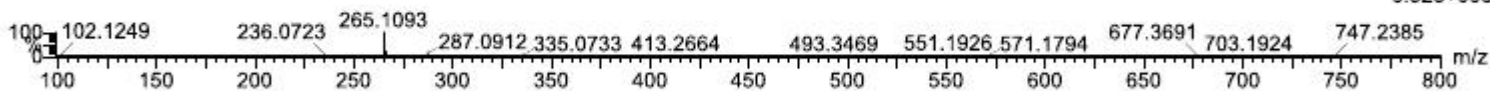

Minimum: -1.5  
Maximum: 1.0 3.0 50.0

| Mass     | Calc. Mass | mDa | PPM | DBE  | i-FIT | Norm | Conf(%) | Formula      |
|----------|------------|-----|-----|------|-------|------|---------|--------------|
| 265.1093 | 265.1089   | 0.4 | 1.5 | 11.5 | 621.3 | n/a  | n/a     | C15 H13 N4 O |

30

ISO 9C 79 (0.515) AM2 (Ar,14000.0,0.00,0.00); Cm (71:94)

1: TOF MS ES+  
6.52e+006

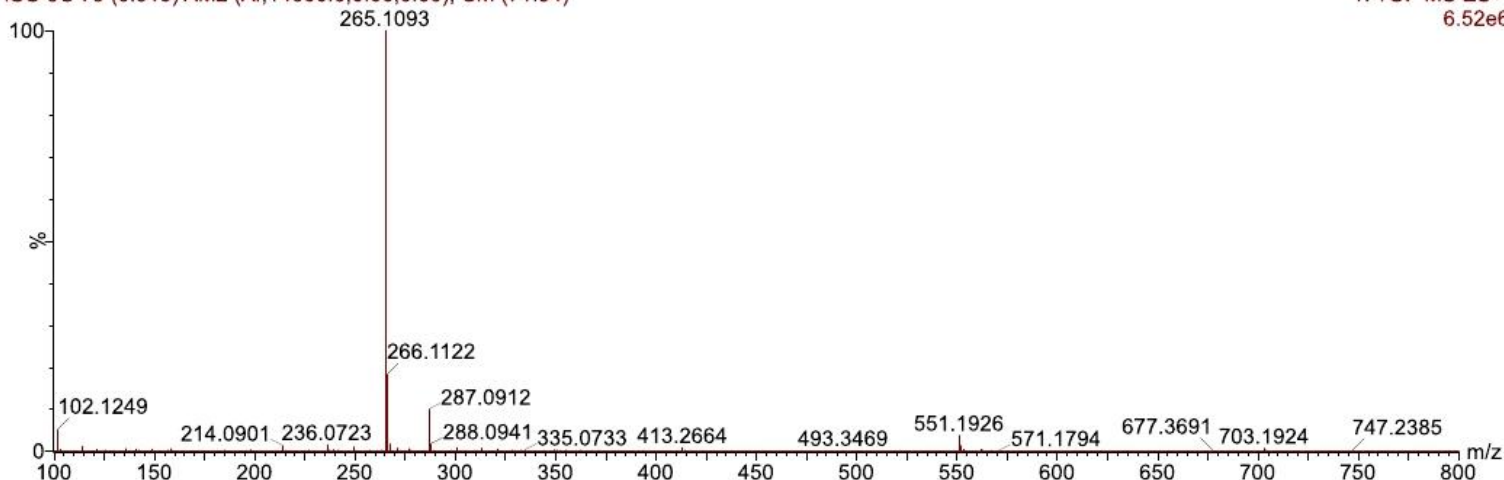

ISO 9C (0.031) Is (1.00,1.00) C15H12N4O

1: TOF MS ES+  
8.35e12

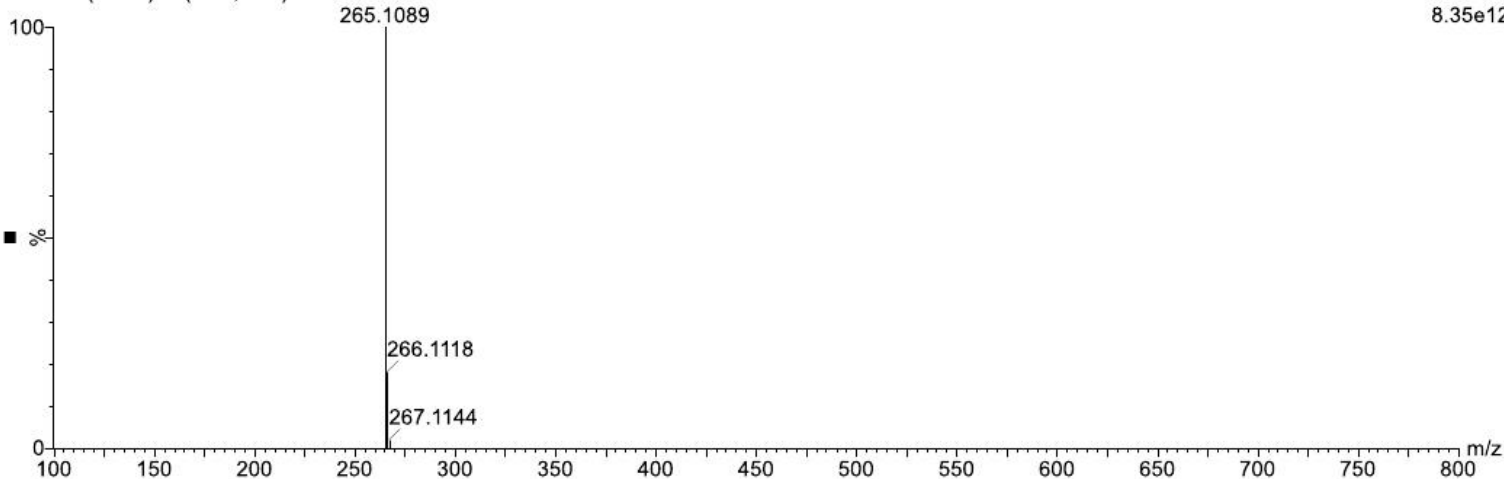

Single Mass Analysis

Tolerance = 3.0 PPM / DBE: min = -1.5, max = 50.0

Element prediction: Off

Number of isotope peaks used for i-FIT = 3

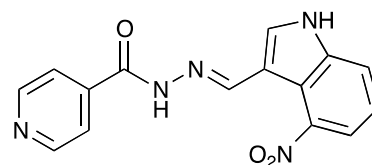

Monoisotopic Mass, Even Electron Ions

393 formula(e) evaluated with 1 results within limits (up to 50 best isotopic matches for each mass)

Elements Used:

C: 0-50 H: 0-100 N: 0-10 O: 0-10

30  
ISO 10C 79 (0.515) AM2 (Ar,14000.0,0.00,0.00); Cm (74:92-31:51x2.000)

1: TOF MS ES+  
1.23e+006

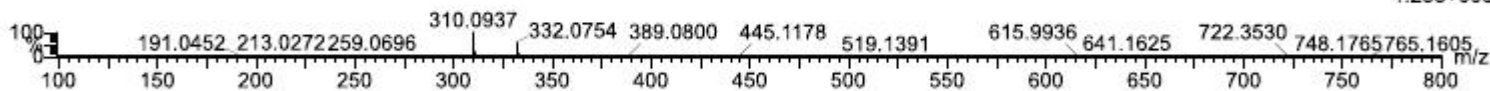

Minimum: -1.5  
Maximum: 1.0 3.0 50.0

| Mass     | Calc. Mass | mDa  | PPM  | DBE  | i-FIT | Norm | Conf (%) | Formula       |
|----------|------------|------|------|------|-------|------|----------|---------------|
| 310.0937 | 310.0940   | -0.3 | -1.0 | 12.5 | 367.8 | n/a  | n/a      | C15 H12 N5 O3 |

30

ISO 10C 79 (0.515) AM2 (Ar,14000.0,0.00,0.00); Cm (74:92-31:51x2.000)

1: TOF MS ES+  
1.23e6

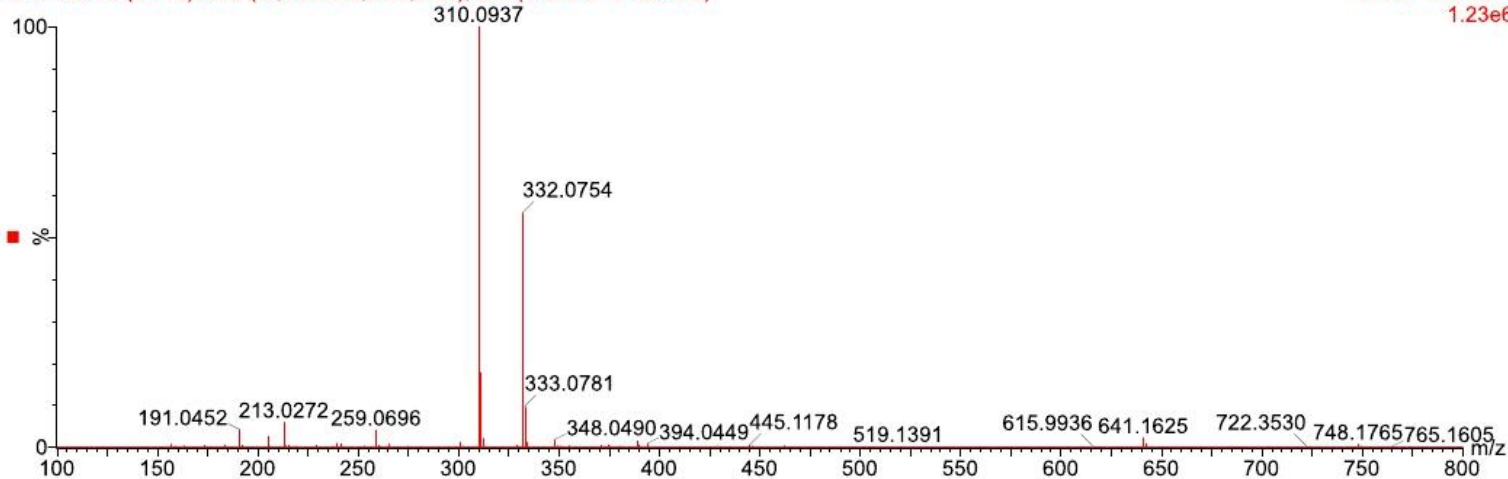

ISO 10C (0.031) Is (1.00,1.00) C15H11N5O3

1: TOF MS ES+  
8.28e12

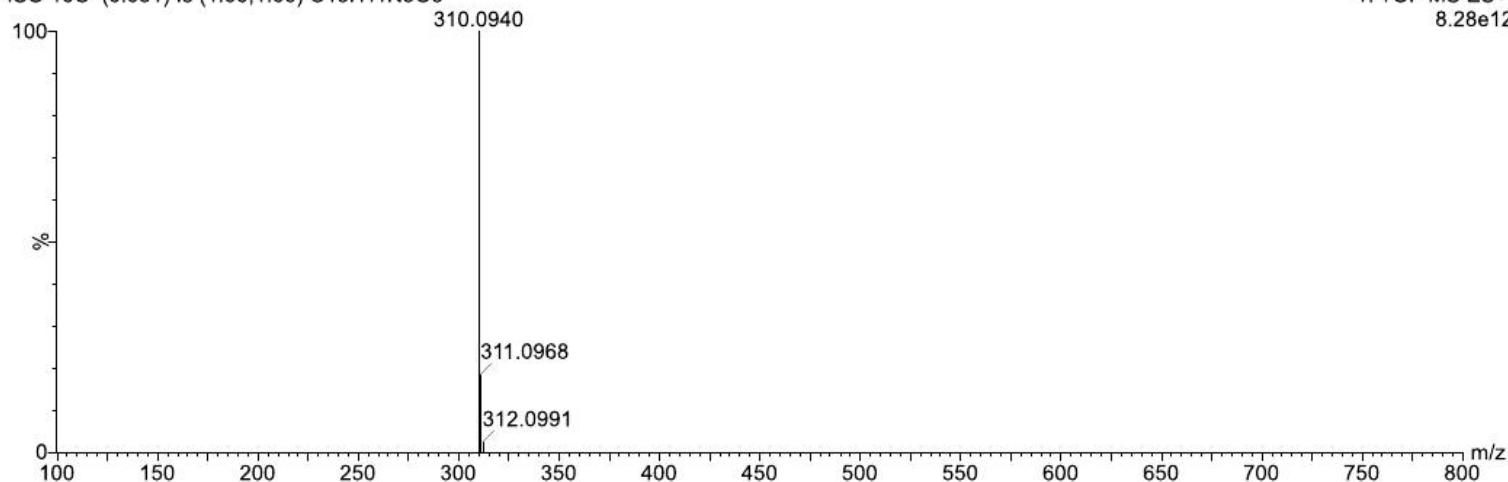



# <sup>1</sup>H NMR

2

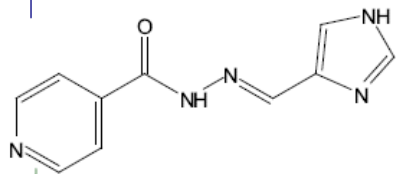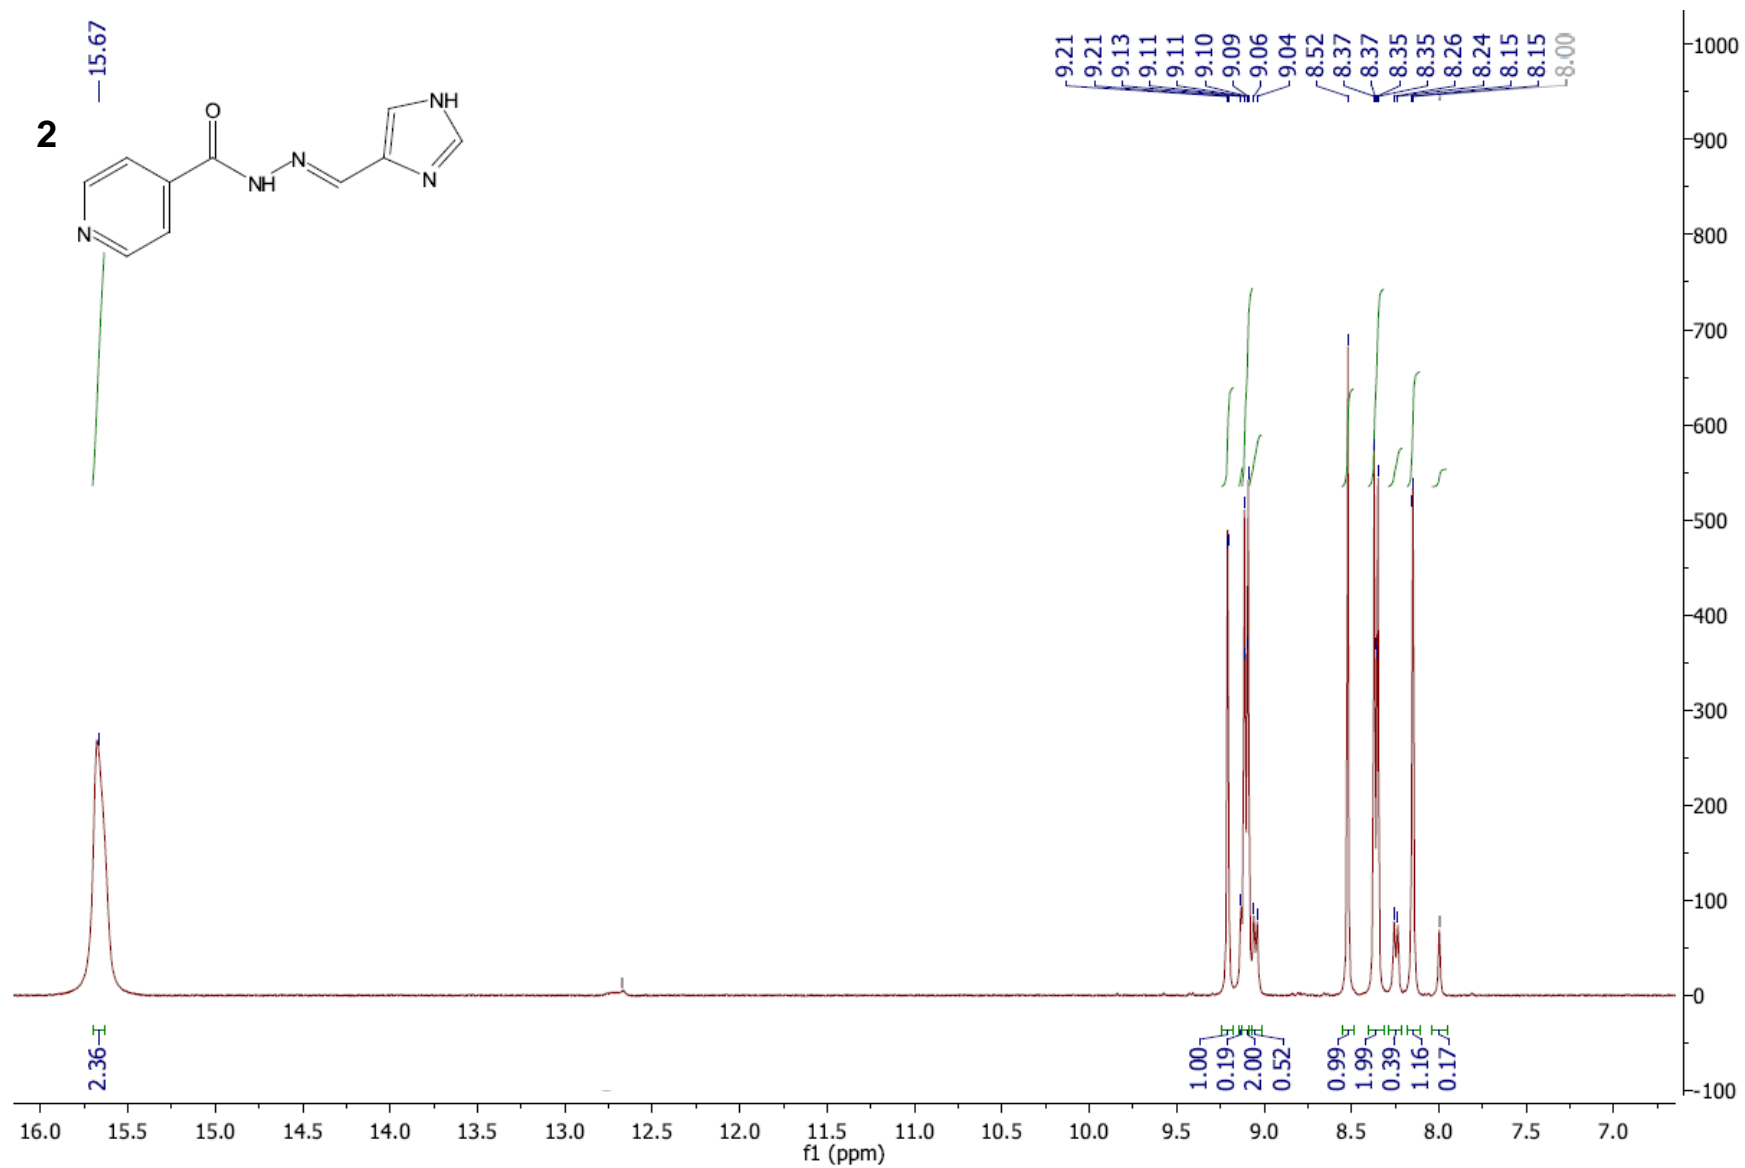

# <sup>13</sup>C NMR

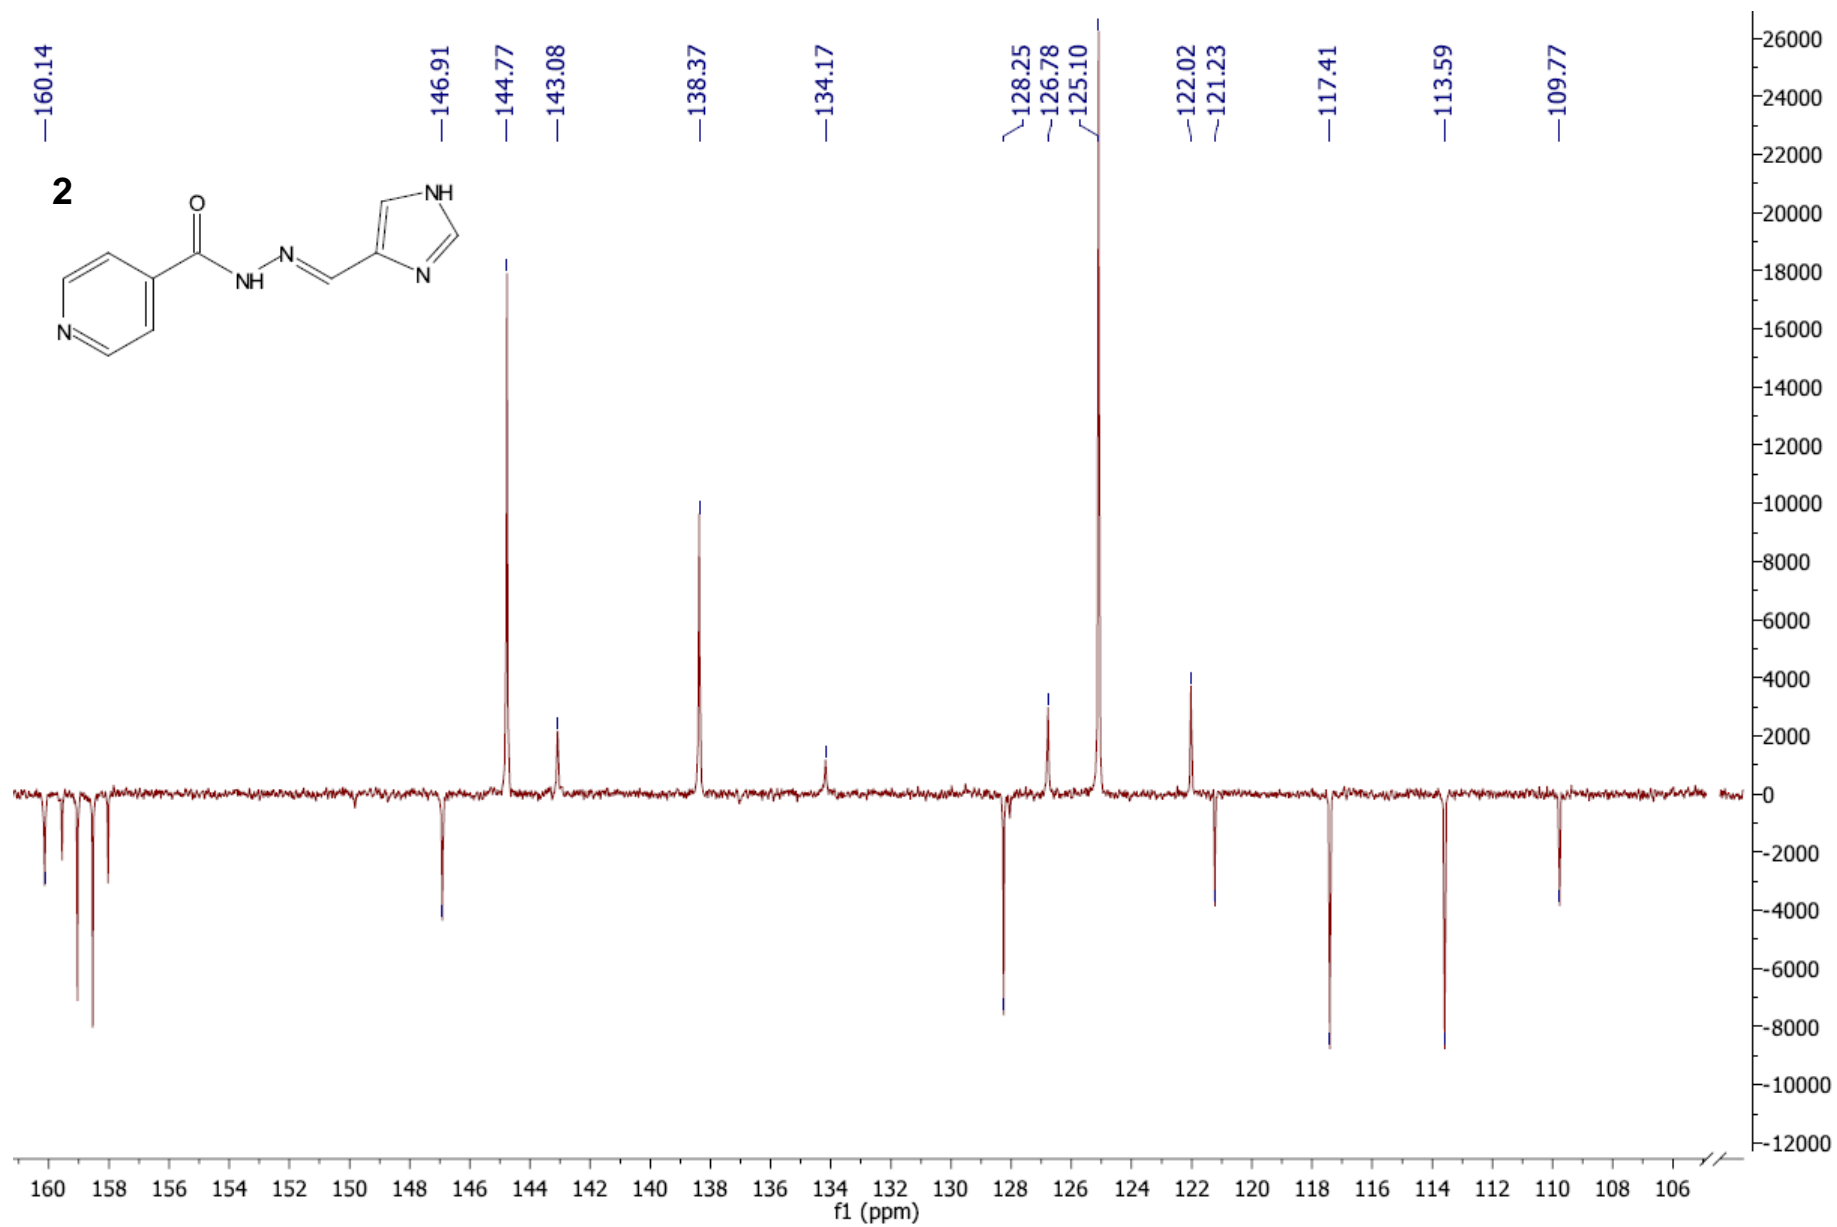

# <sup>1</sup>H NMR

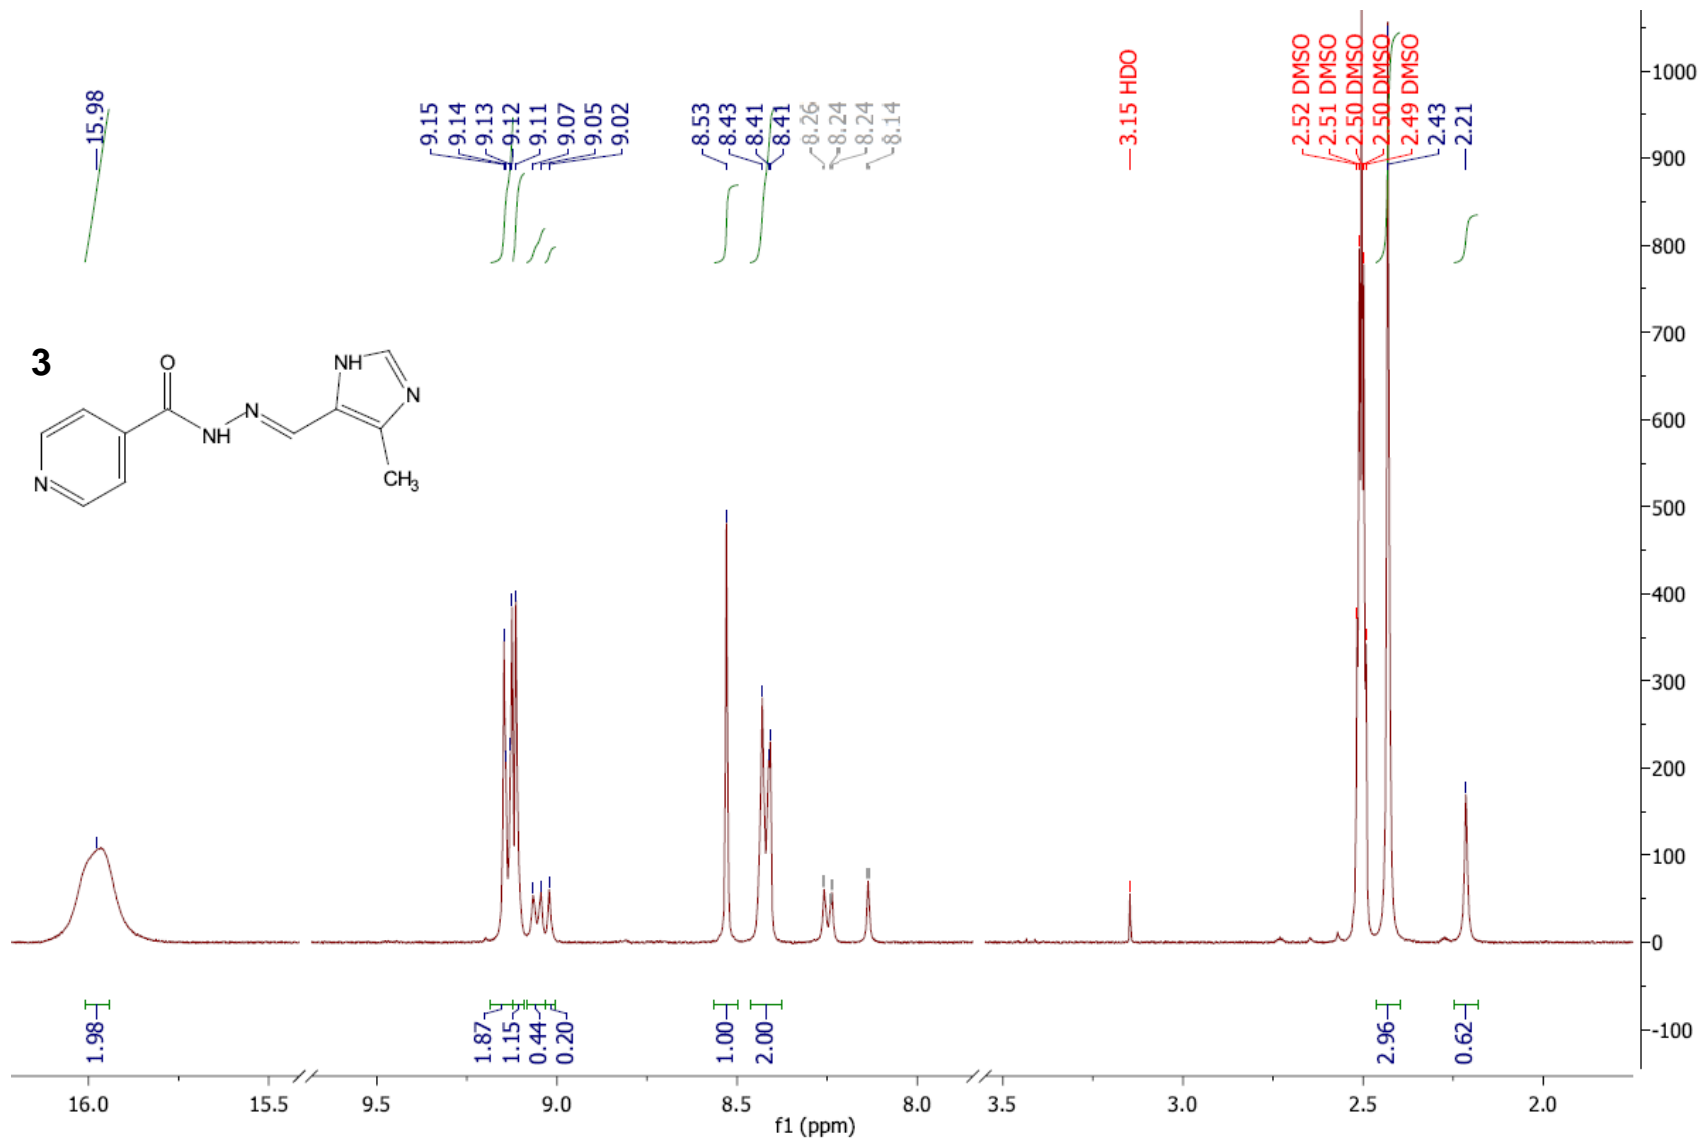

# <sup>13</sup>C NMR

3

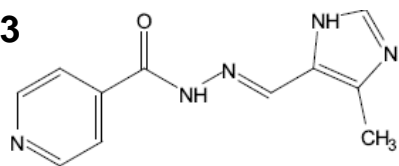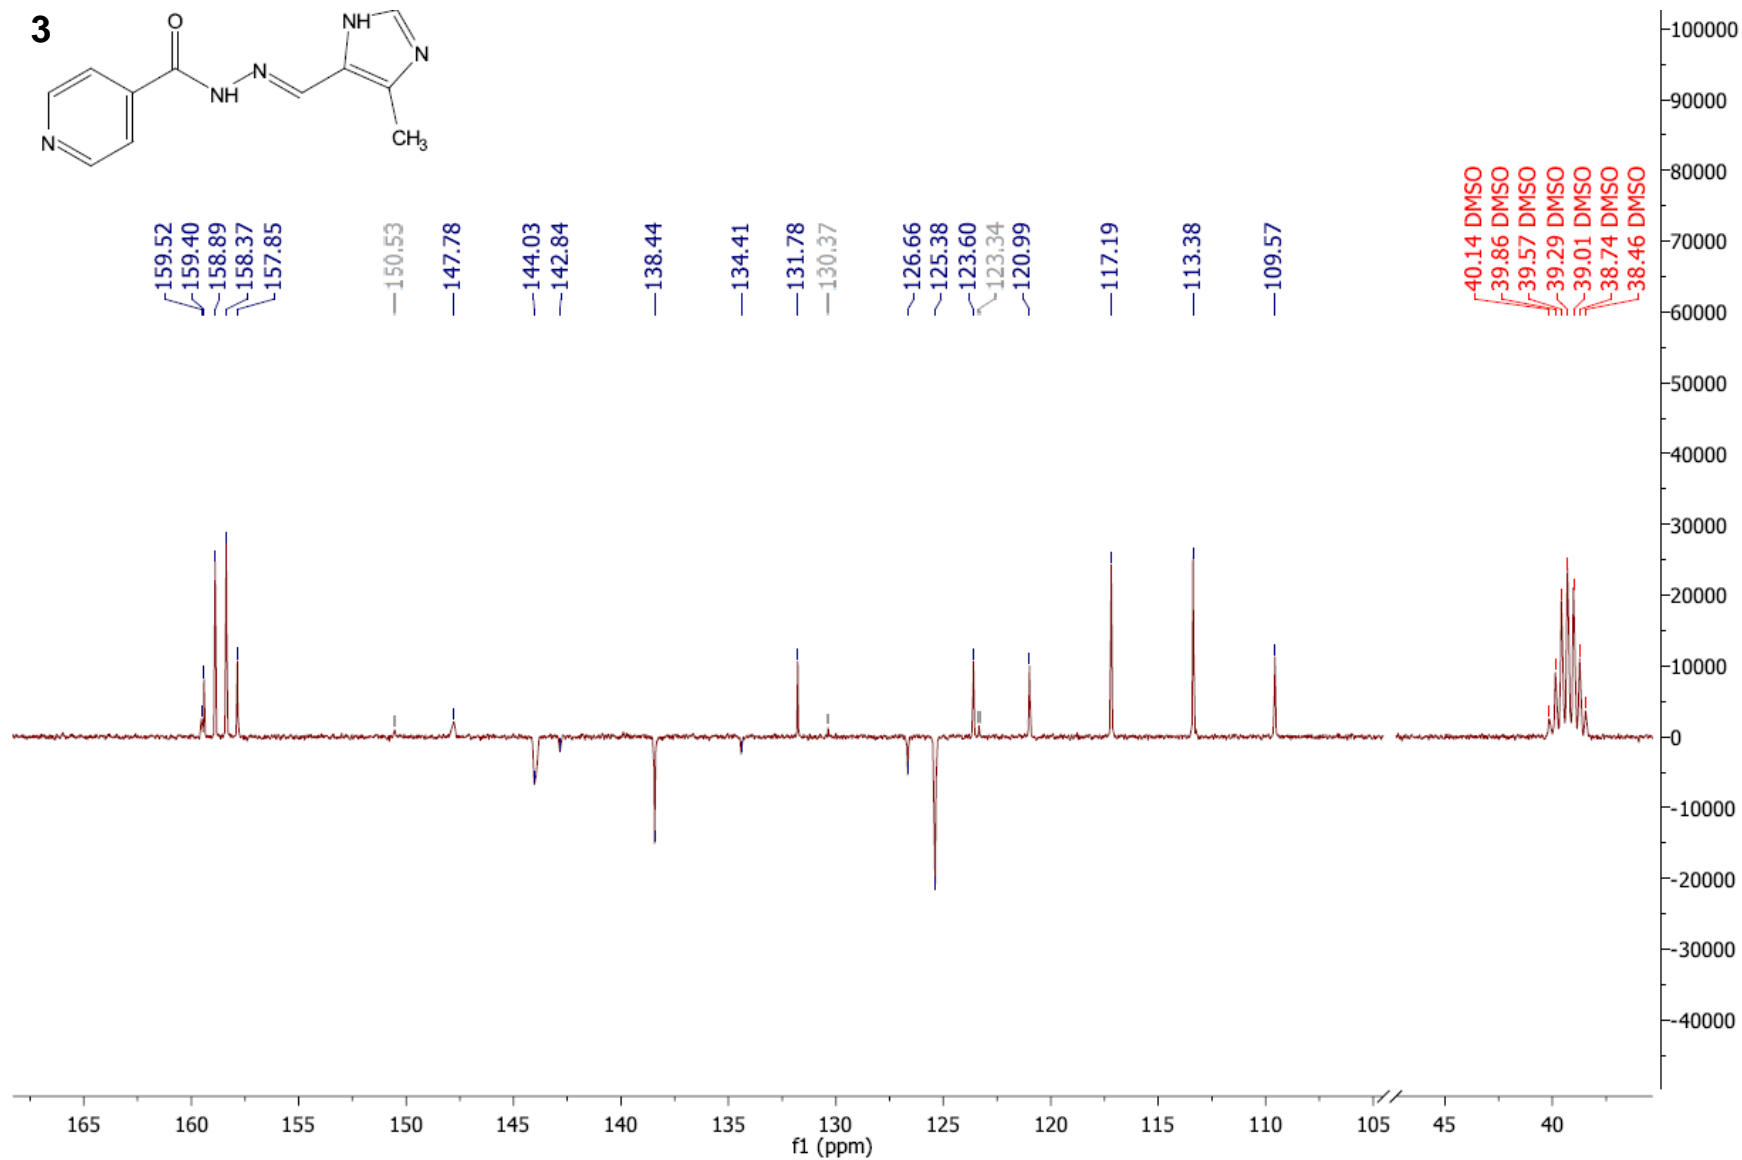

# <sup>1</sup>H NMR

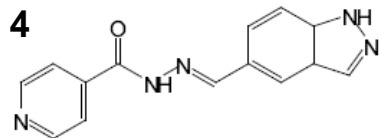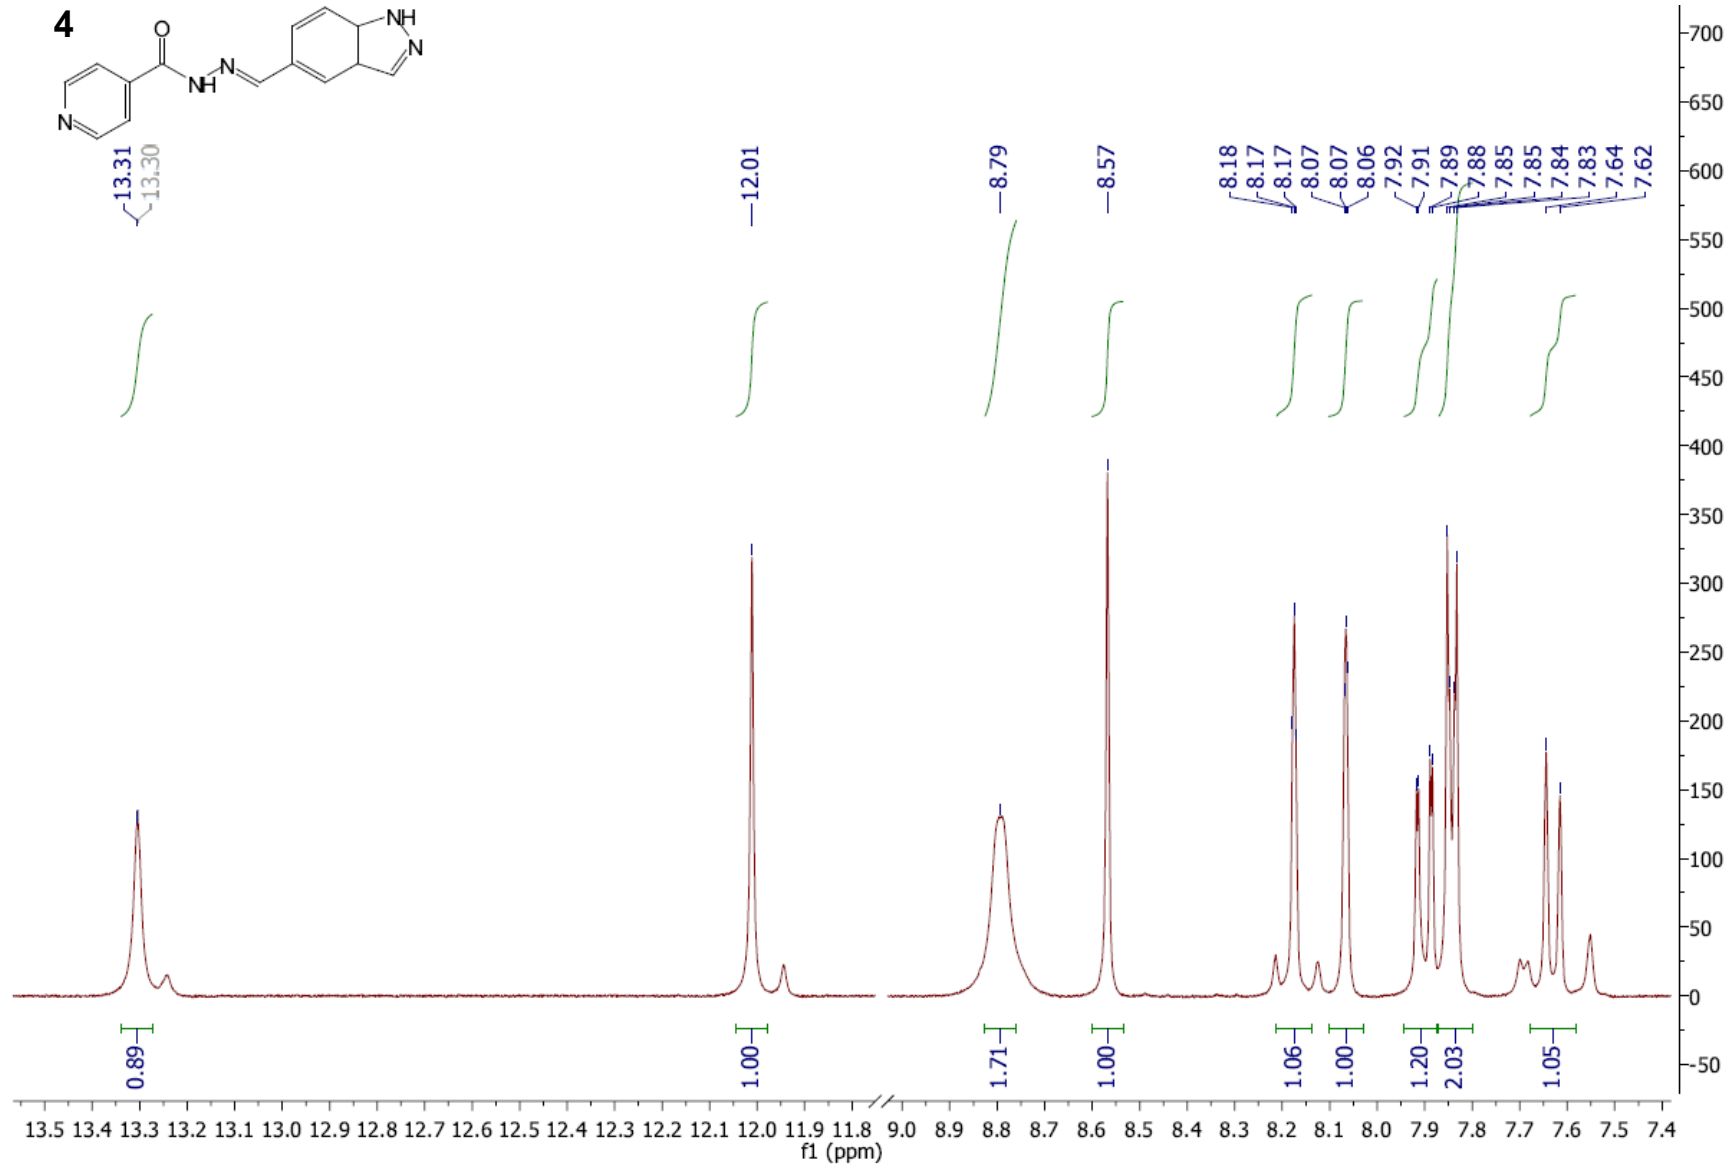

# <sup>13</sup>C NMR

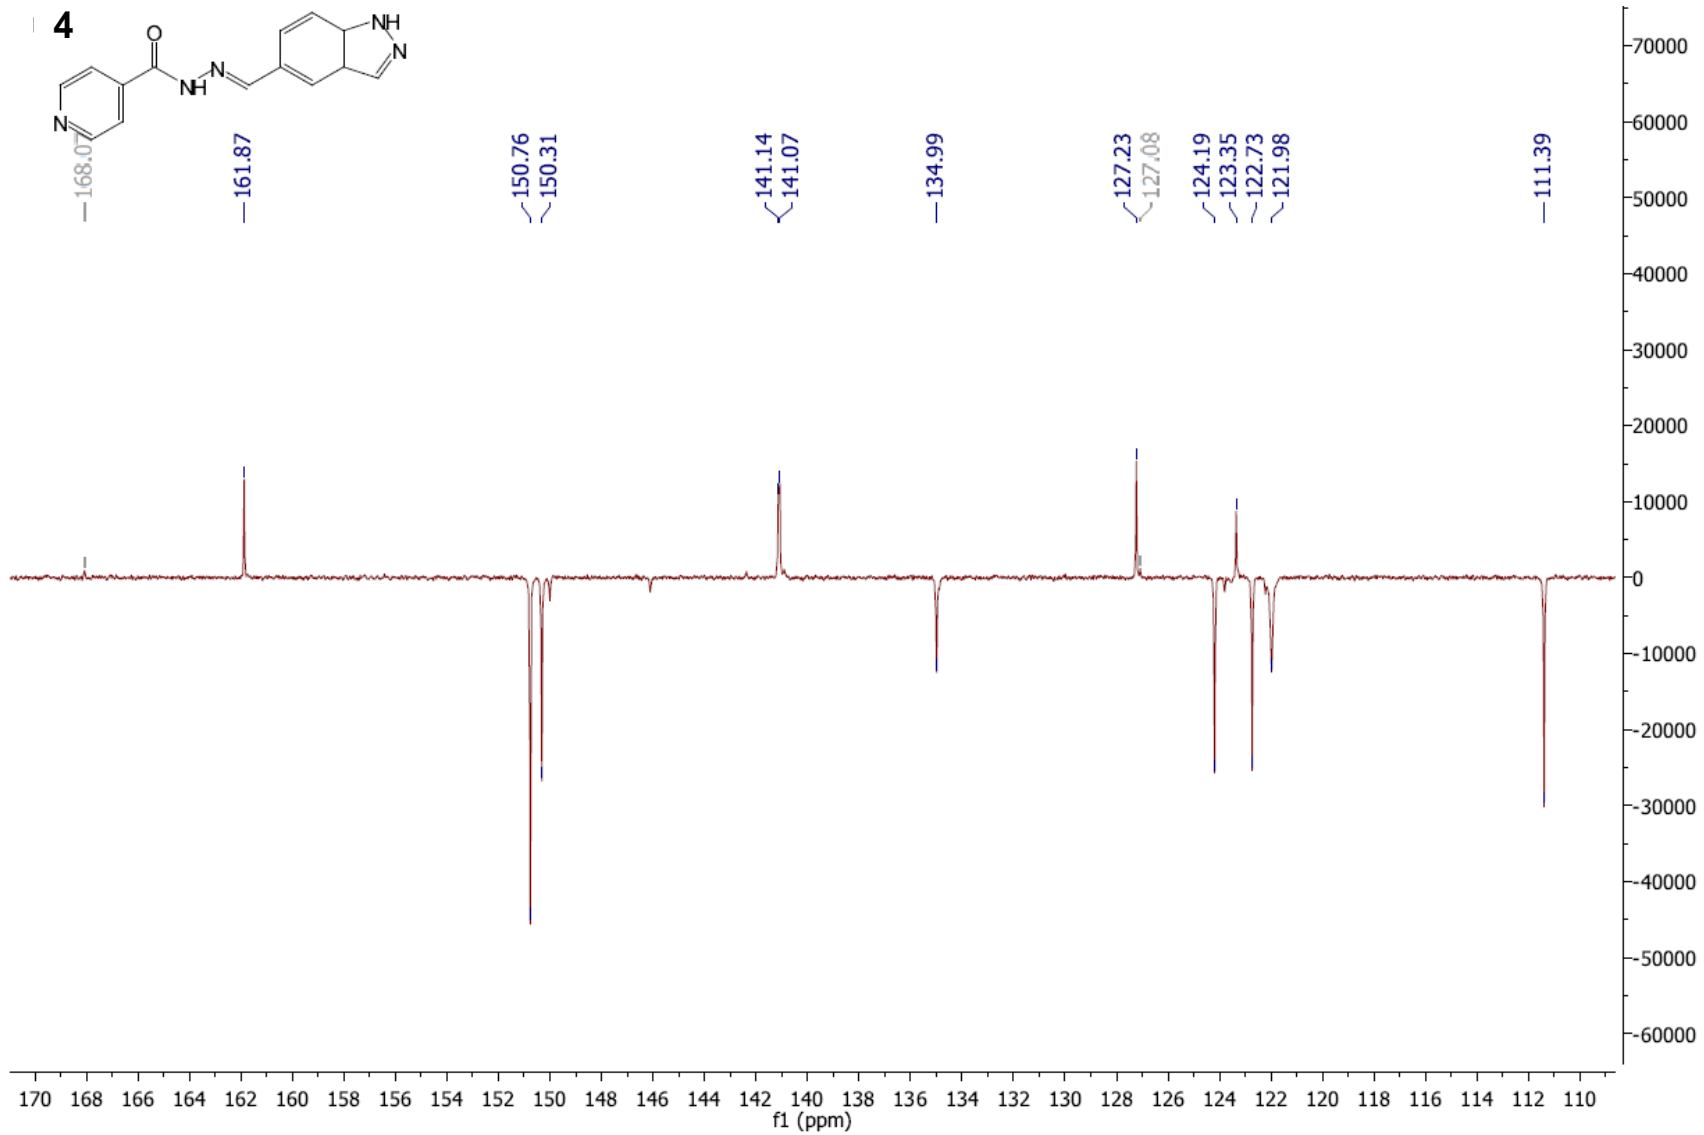

# <sup>1</sup>H NMR

5

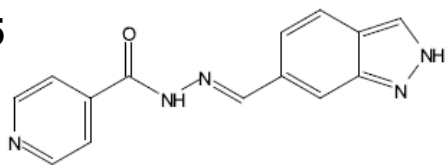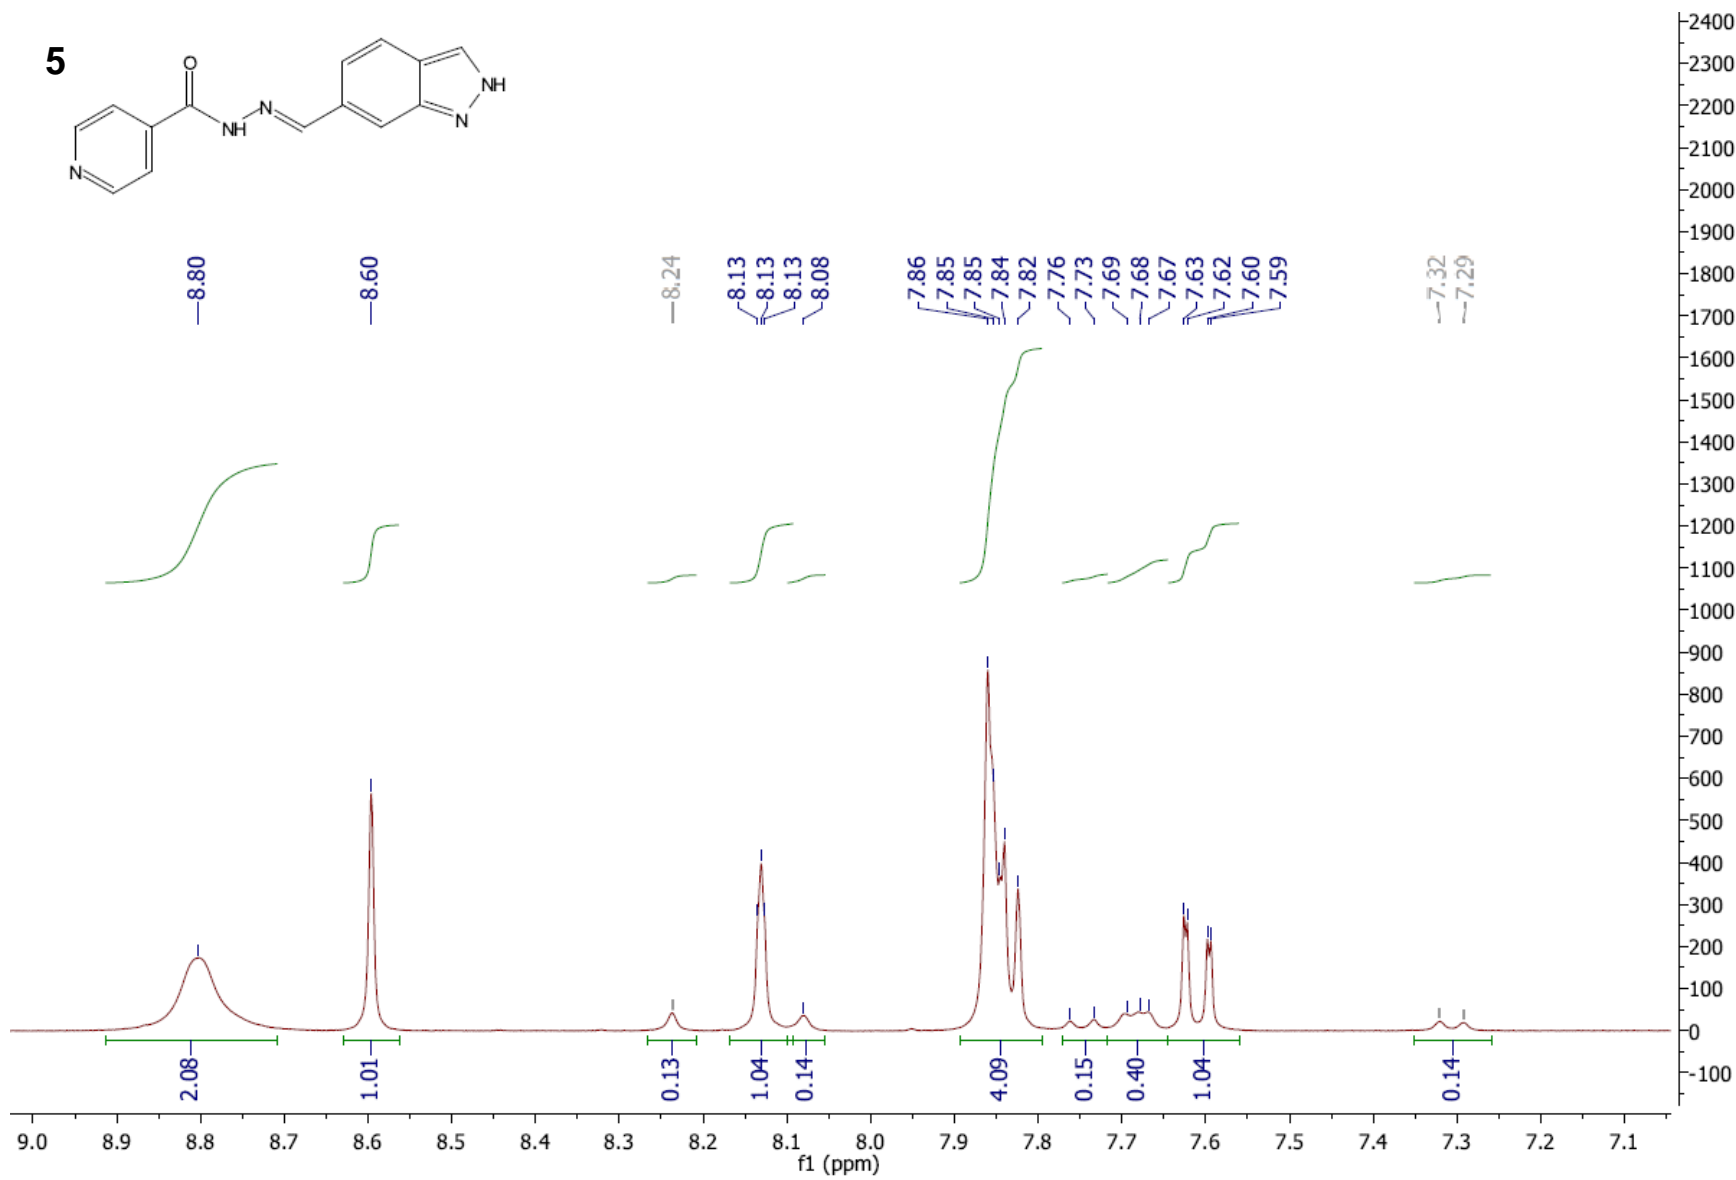

# <sup>13</sup>C NMR

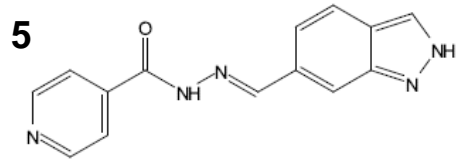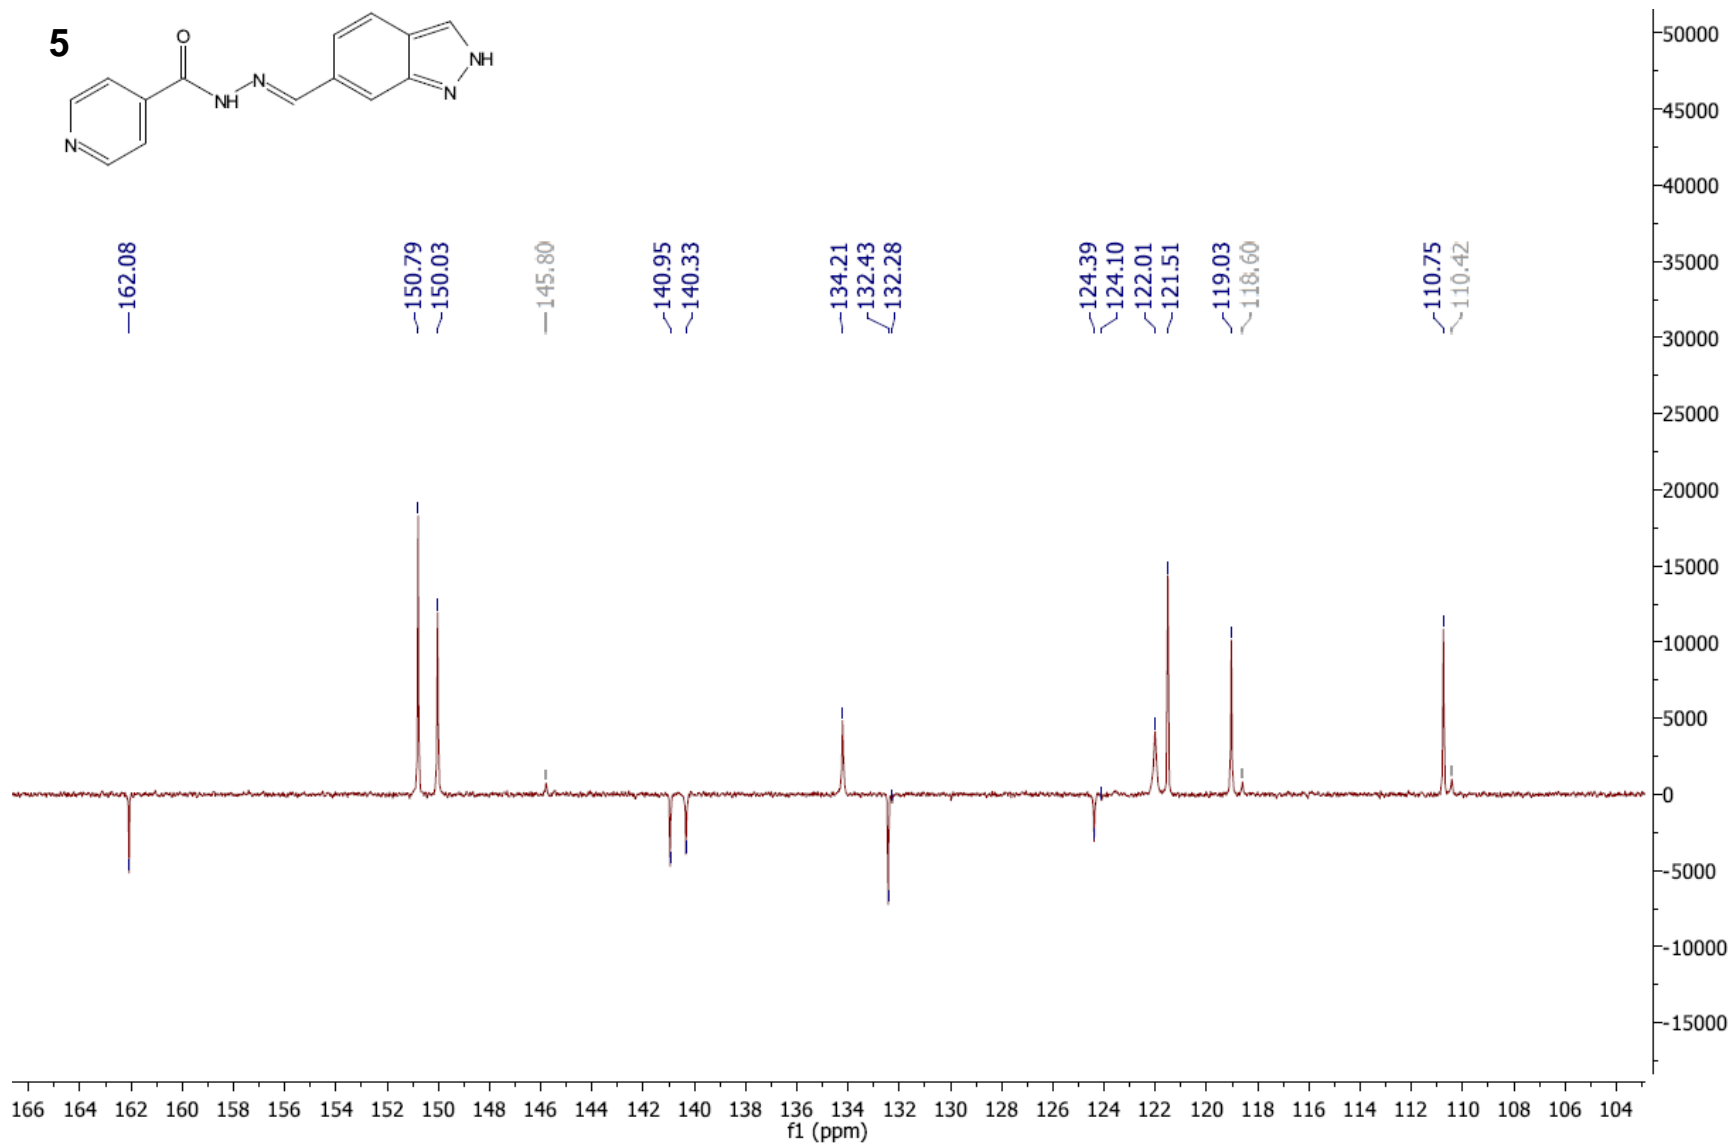



# <sup>1</sup>H NMR

6

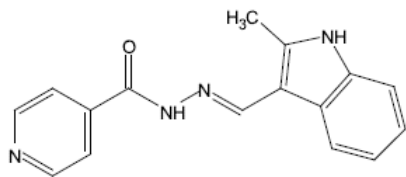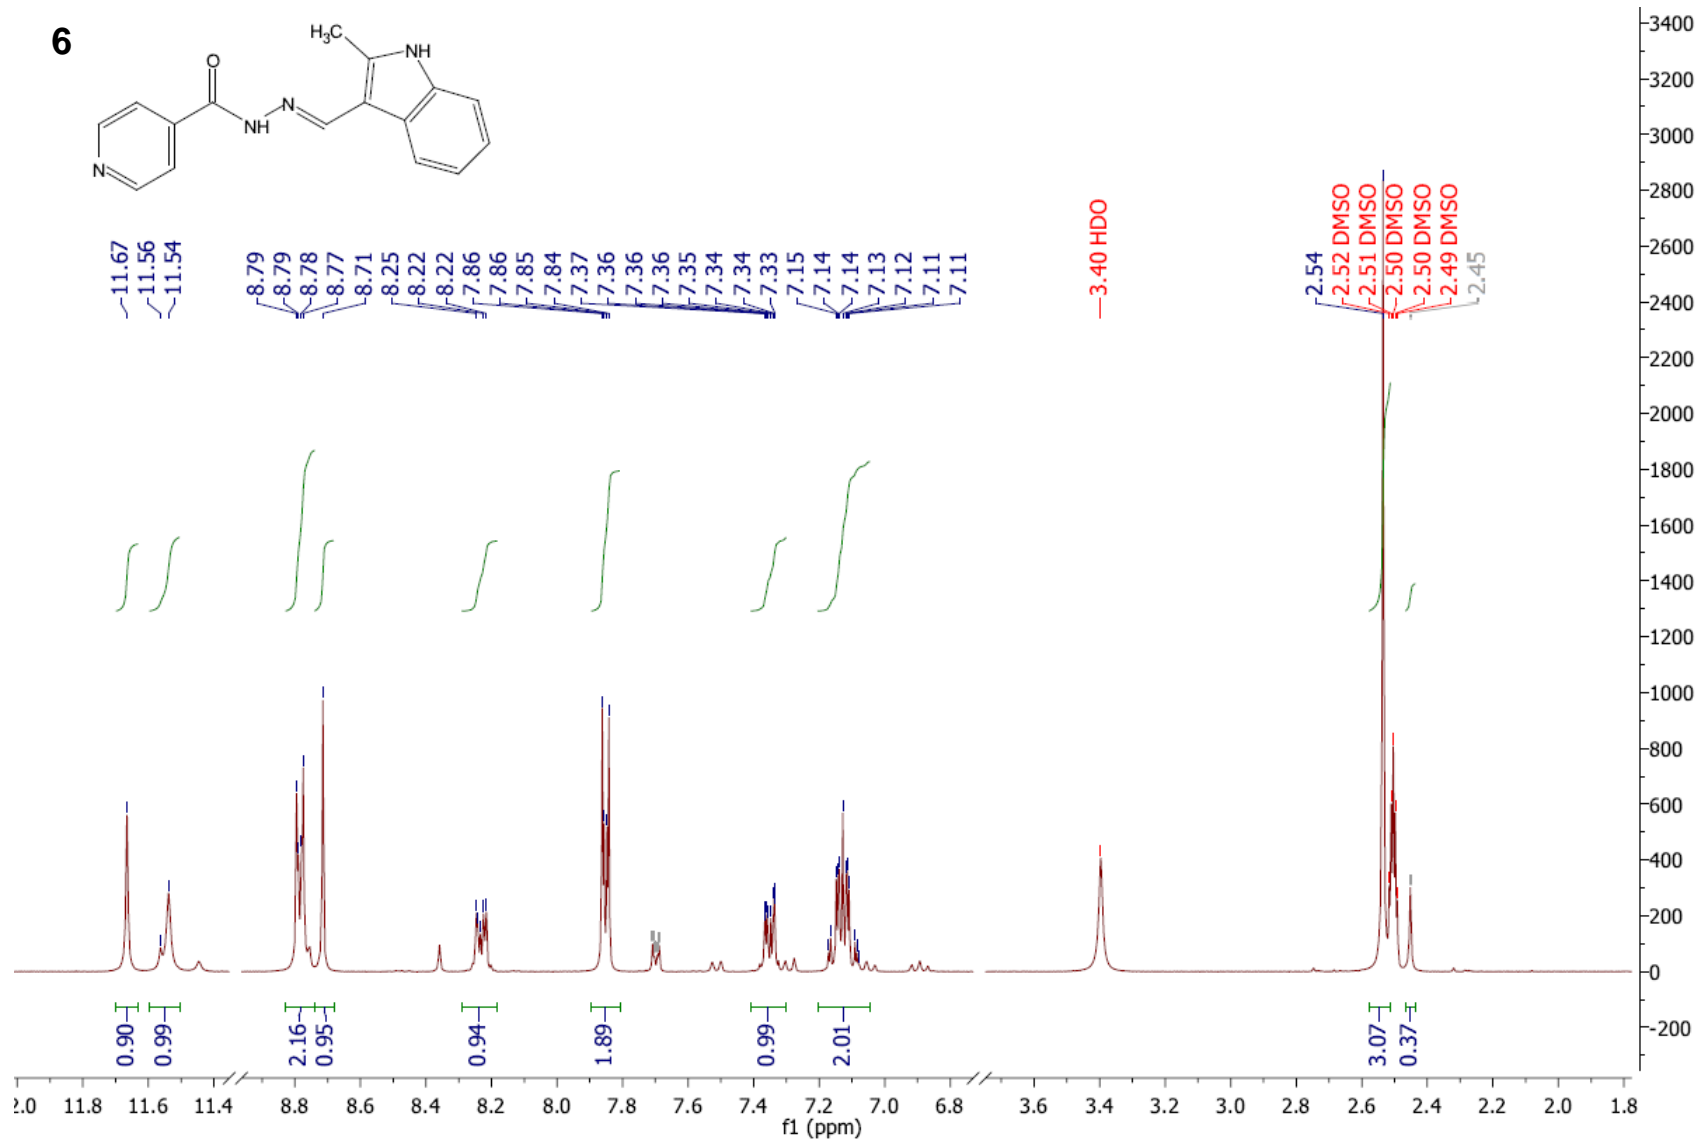

# <sup>13</sup>C NMR

marques\_service300a.17.fid  
passeur SPCMIB-PNASM  
13C jmod ISO-5ts-p

6

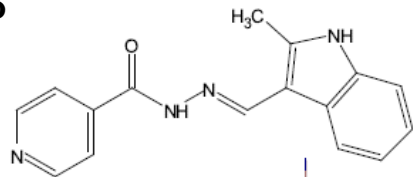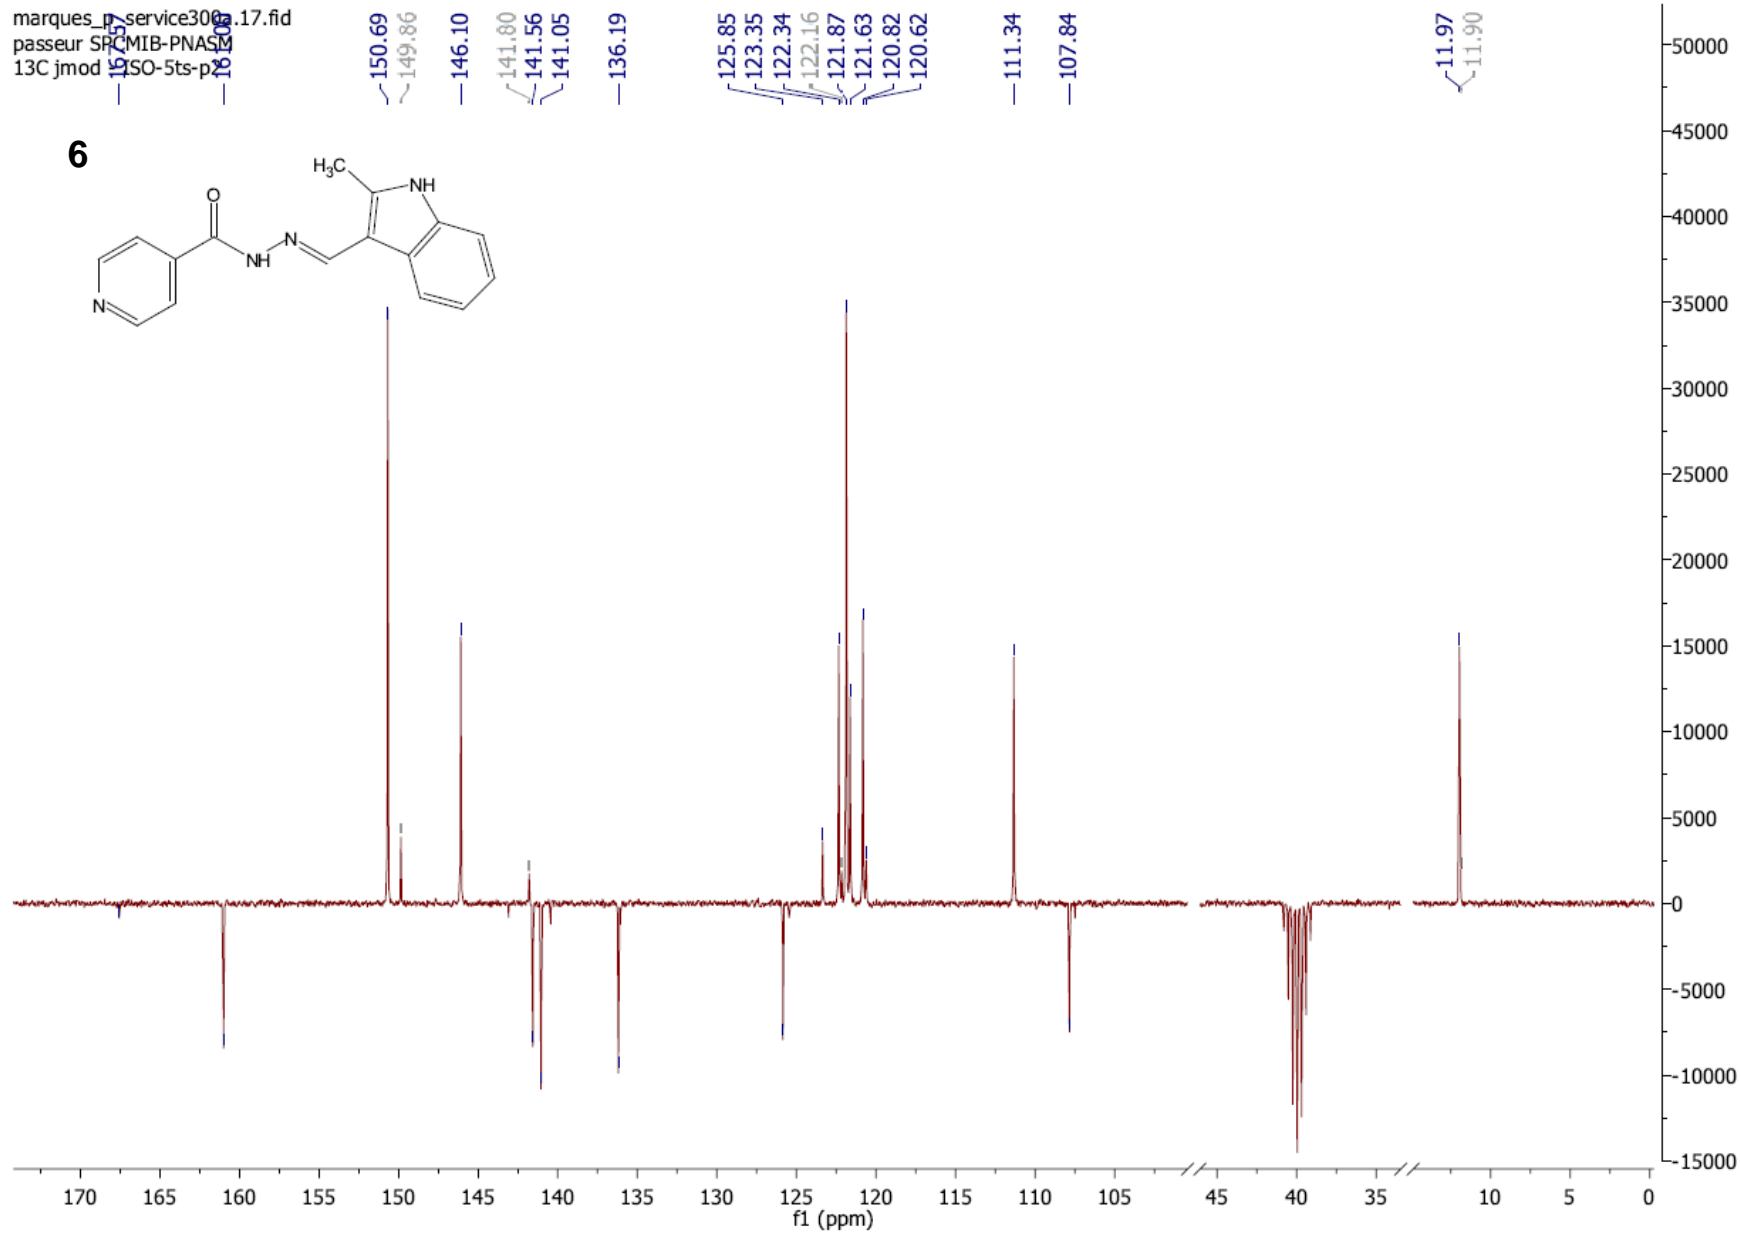

# <sup>1</sup>H NMR

7

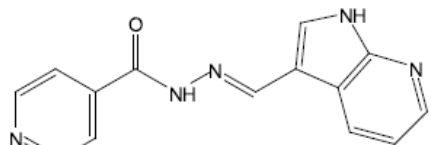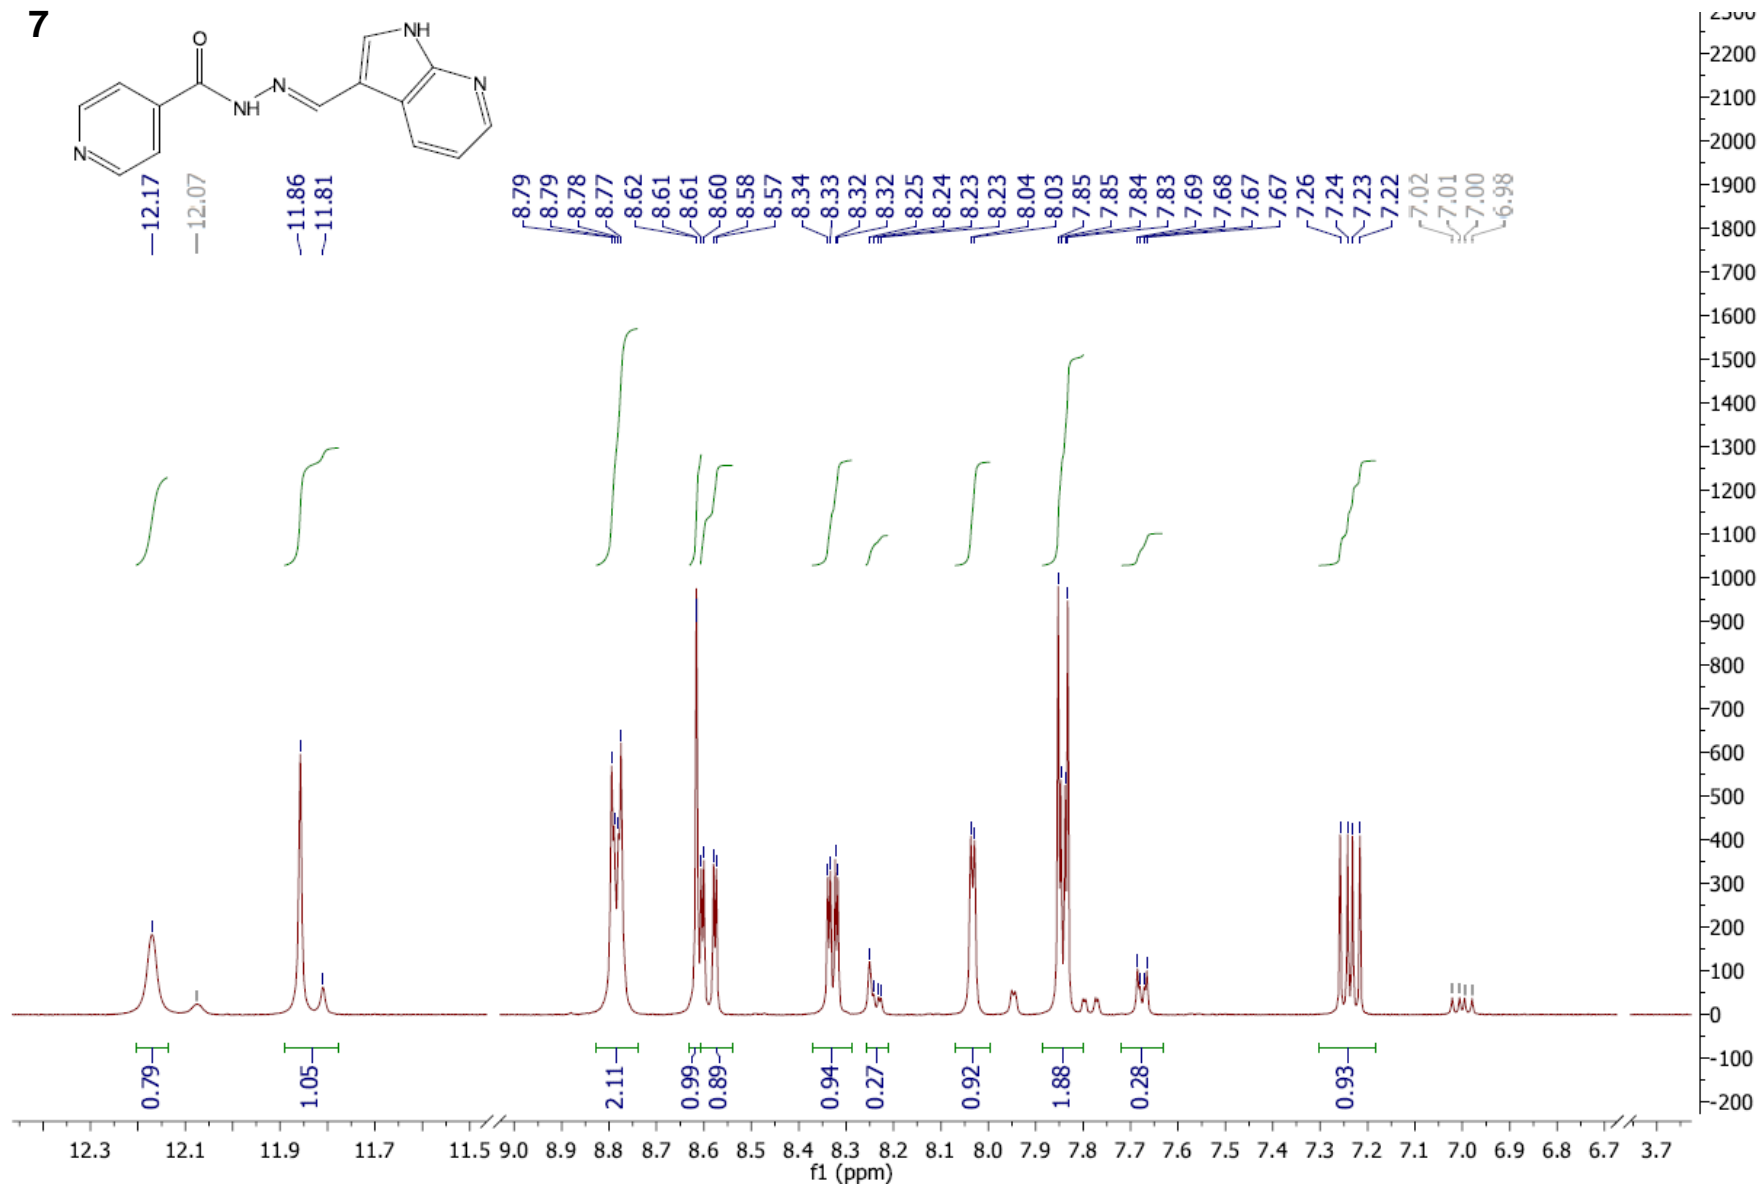

# <sup>13</sup>C NMR

marques\_p\_service300a.22.fid  
passeur SPCMIB-PNASM  
13C jmod - ISO-60p2

7

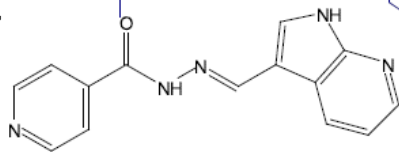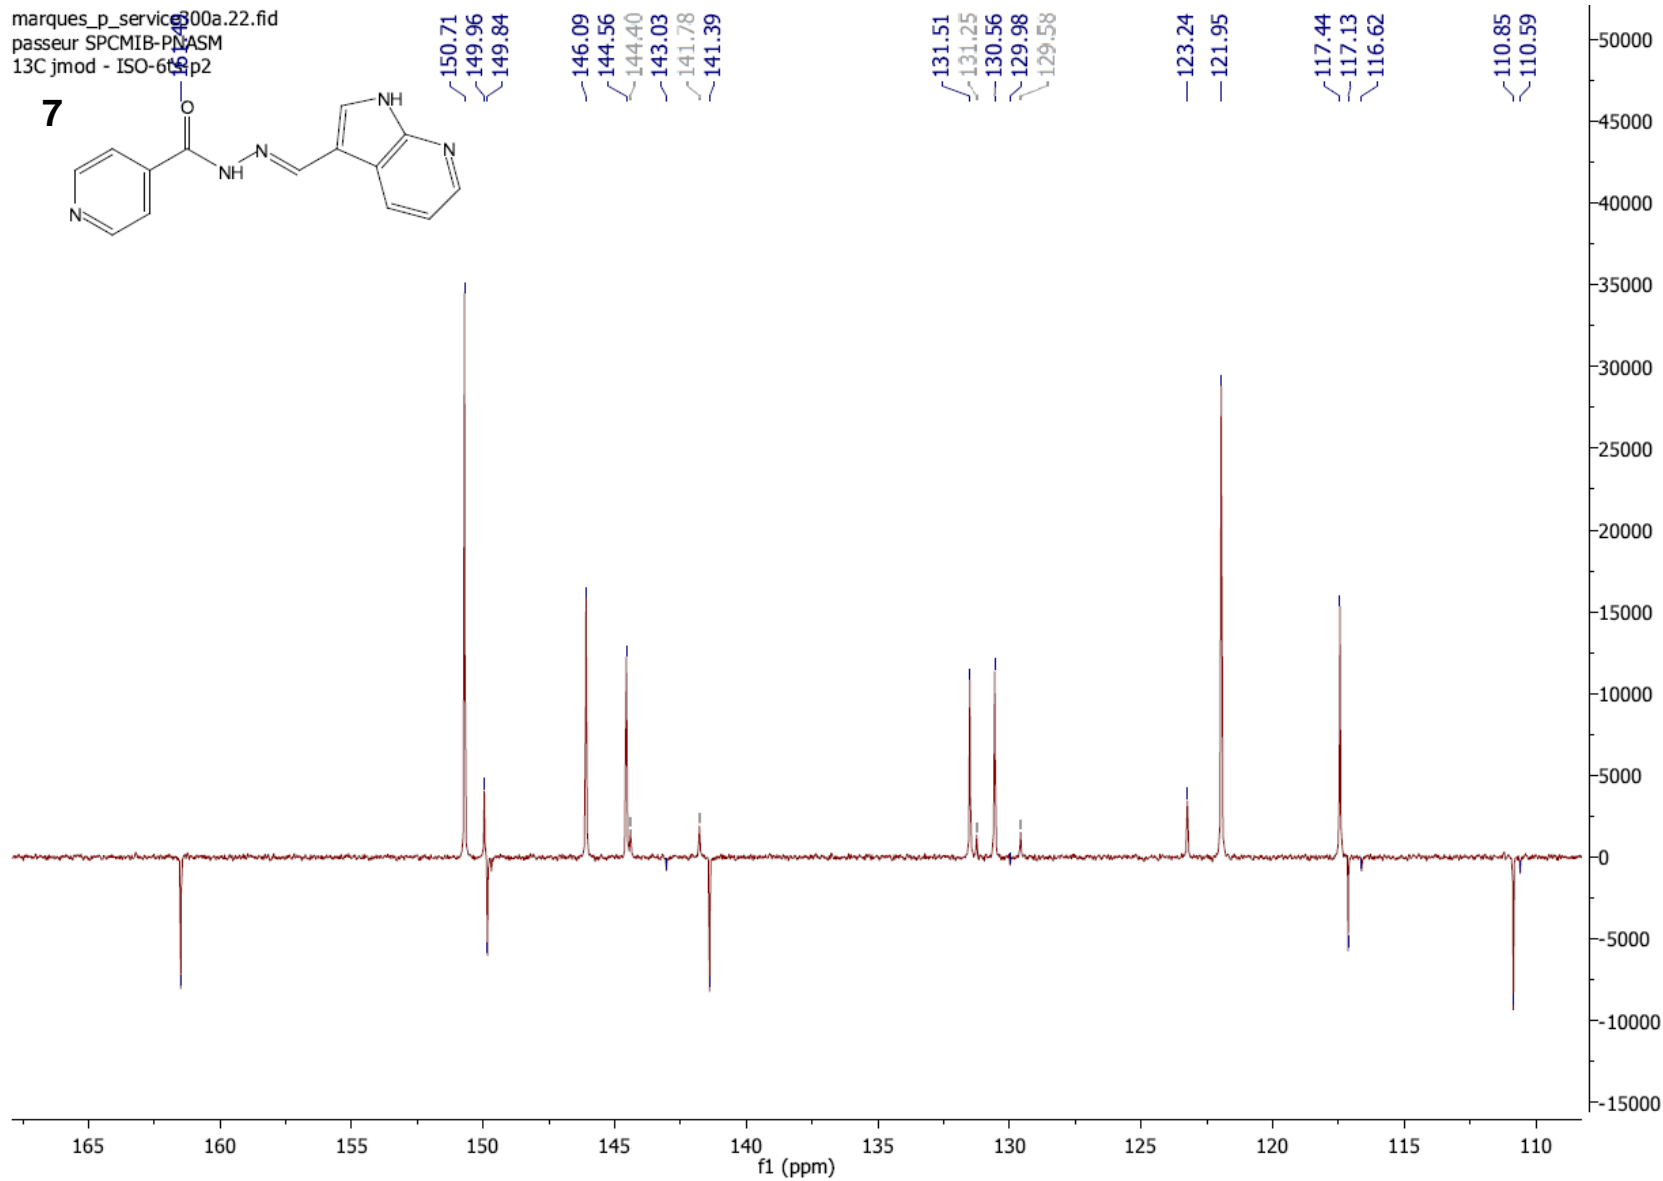

# <sup>1</sup>H NMR

8

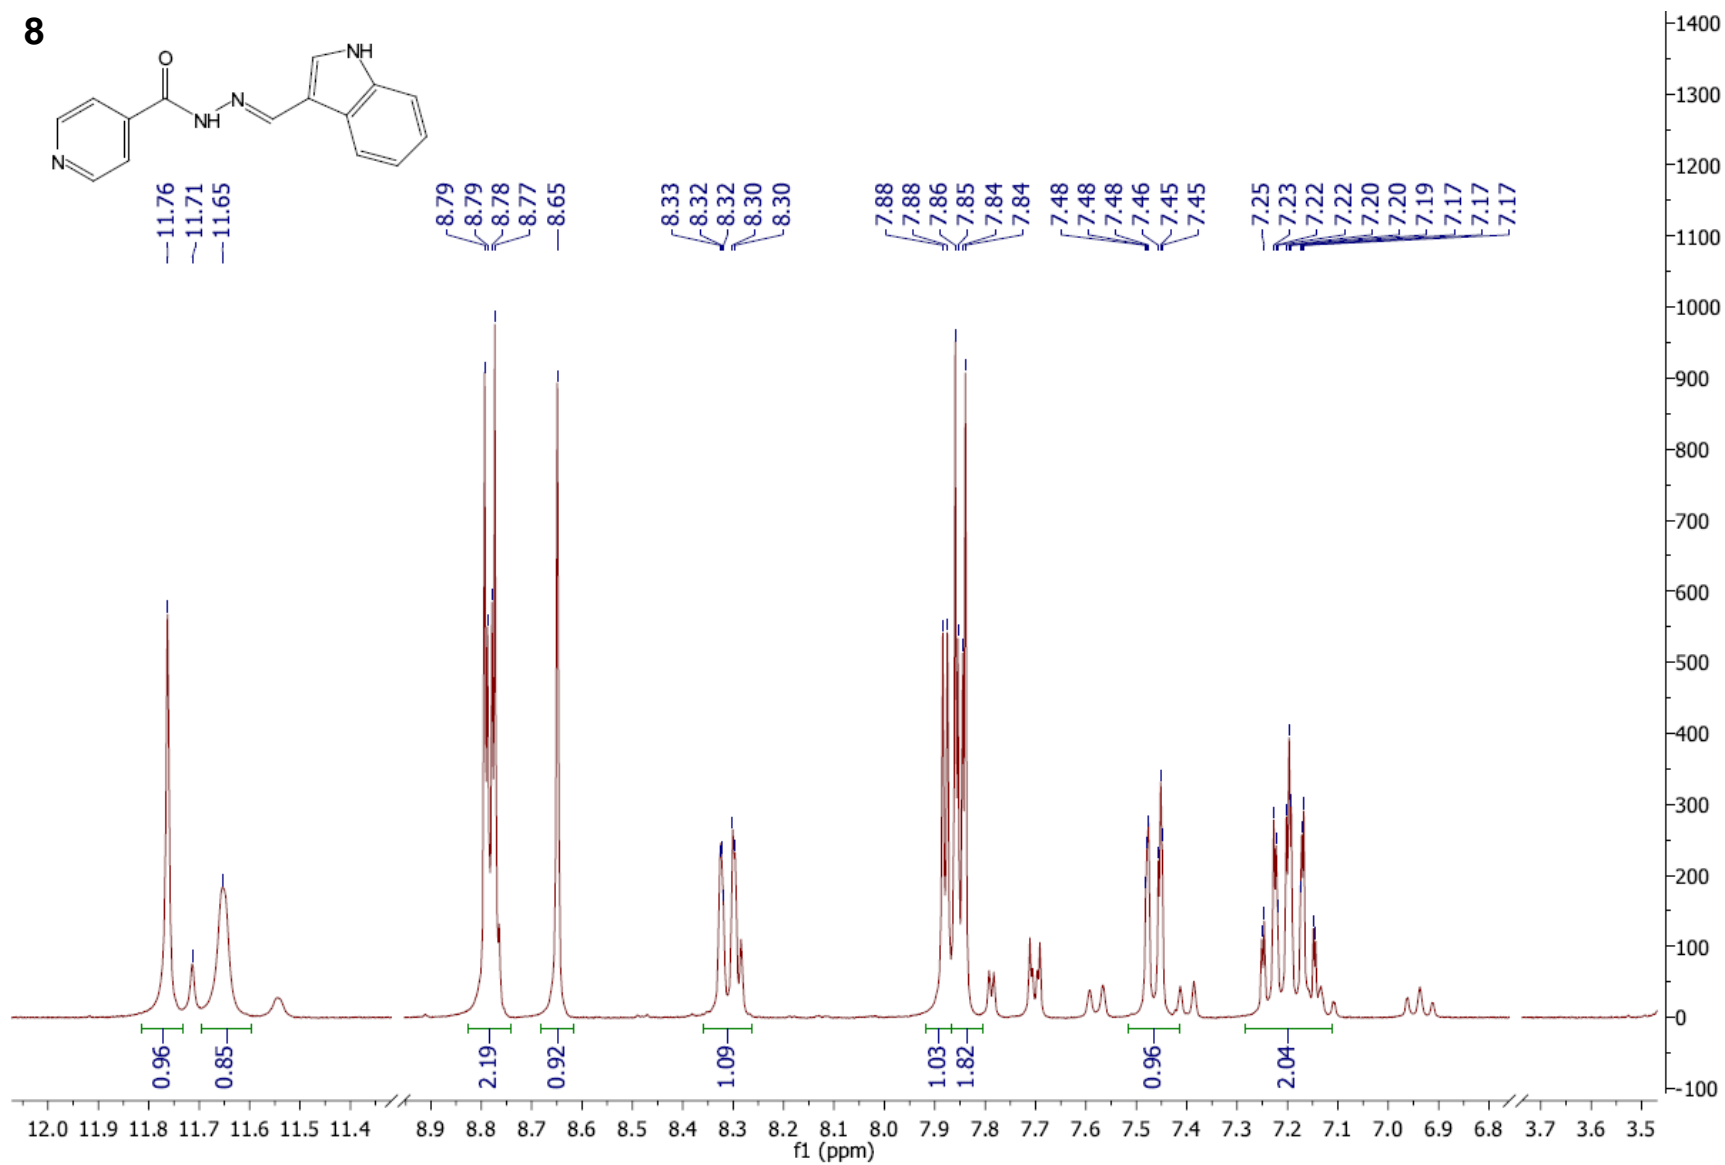

# <sup>13</sup>C NMR

8

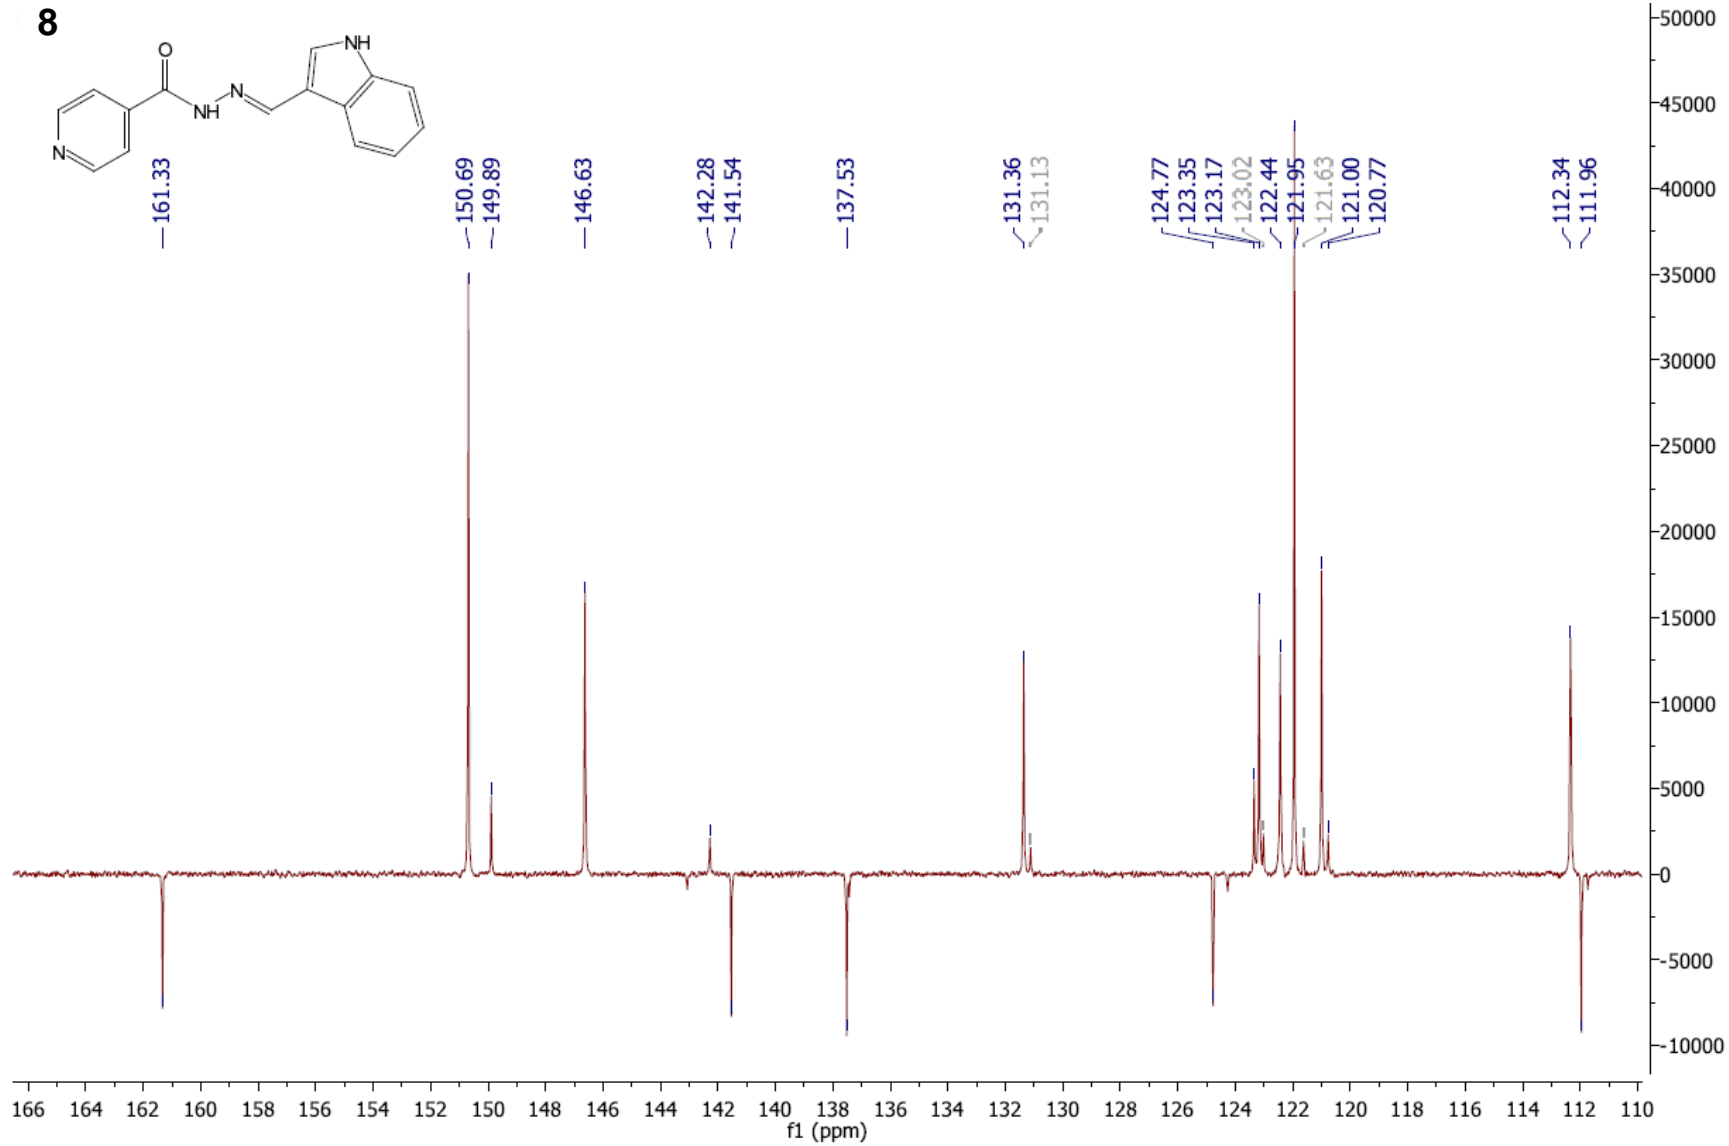

# <sup>1</sup>H NMR

9

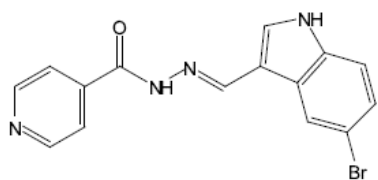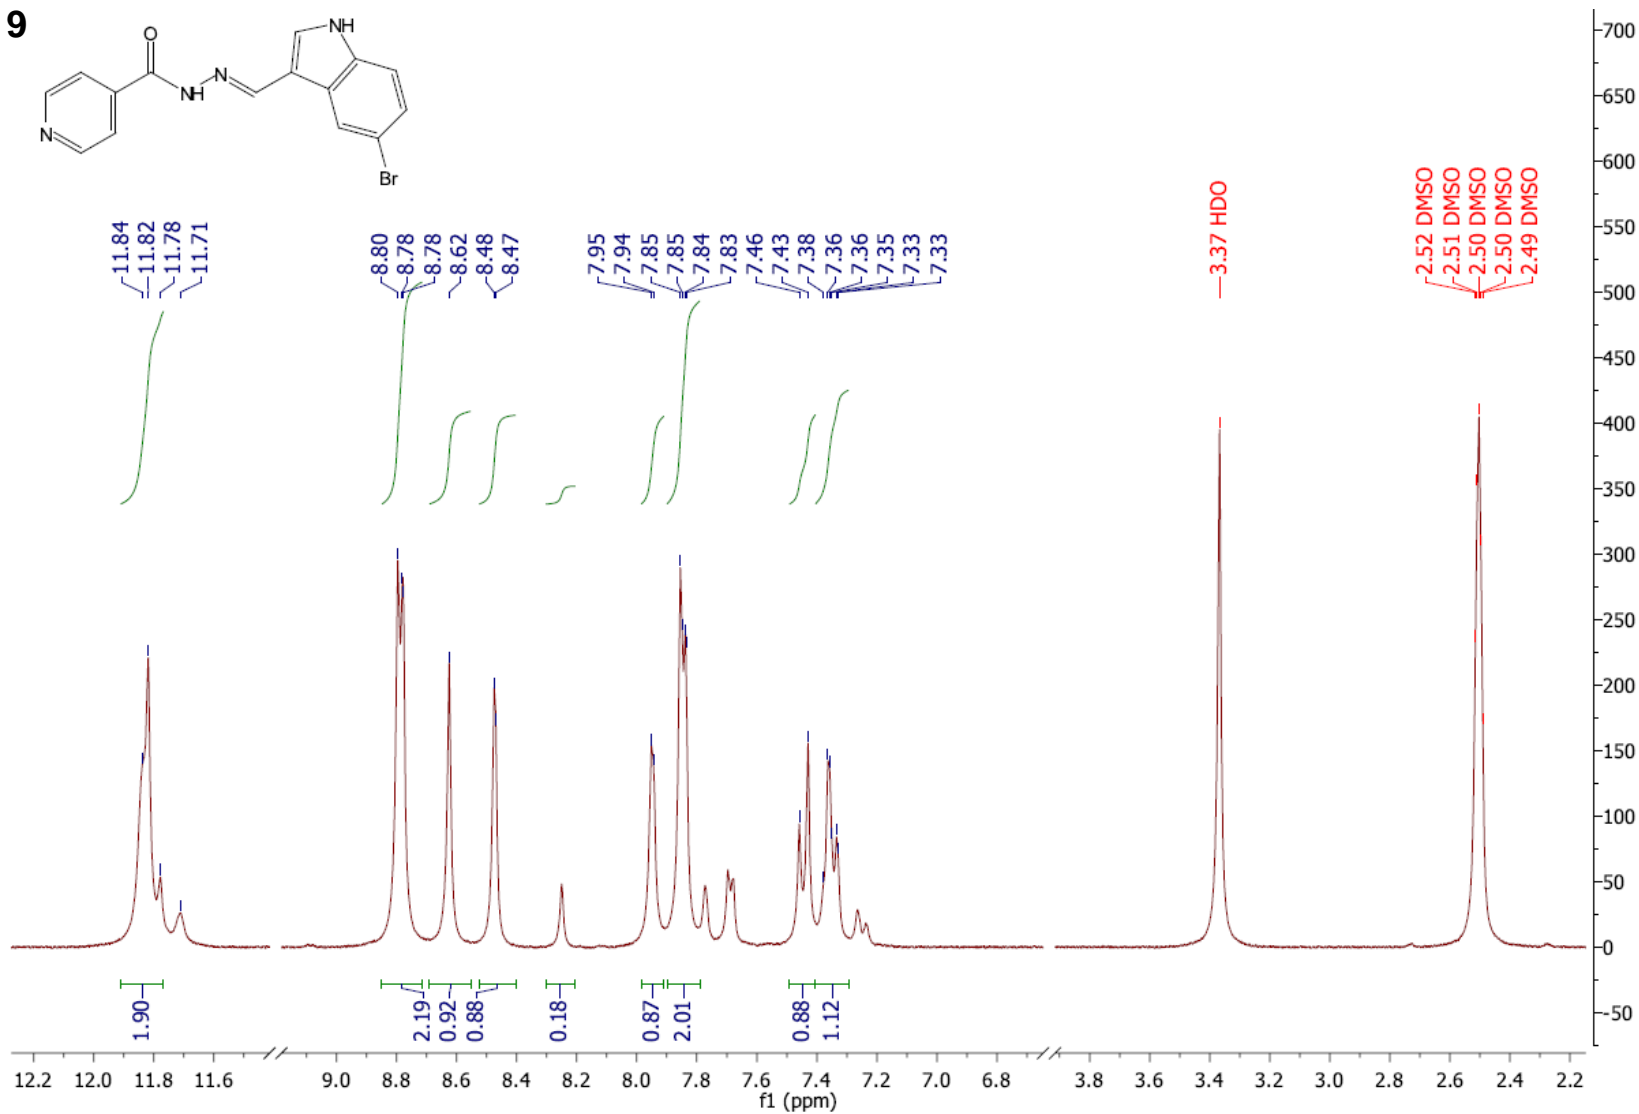

# <sup>13</sup>C NMR

9

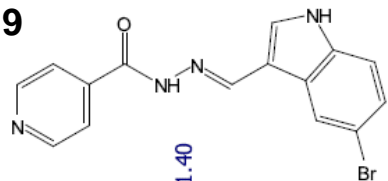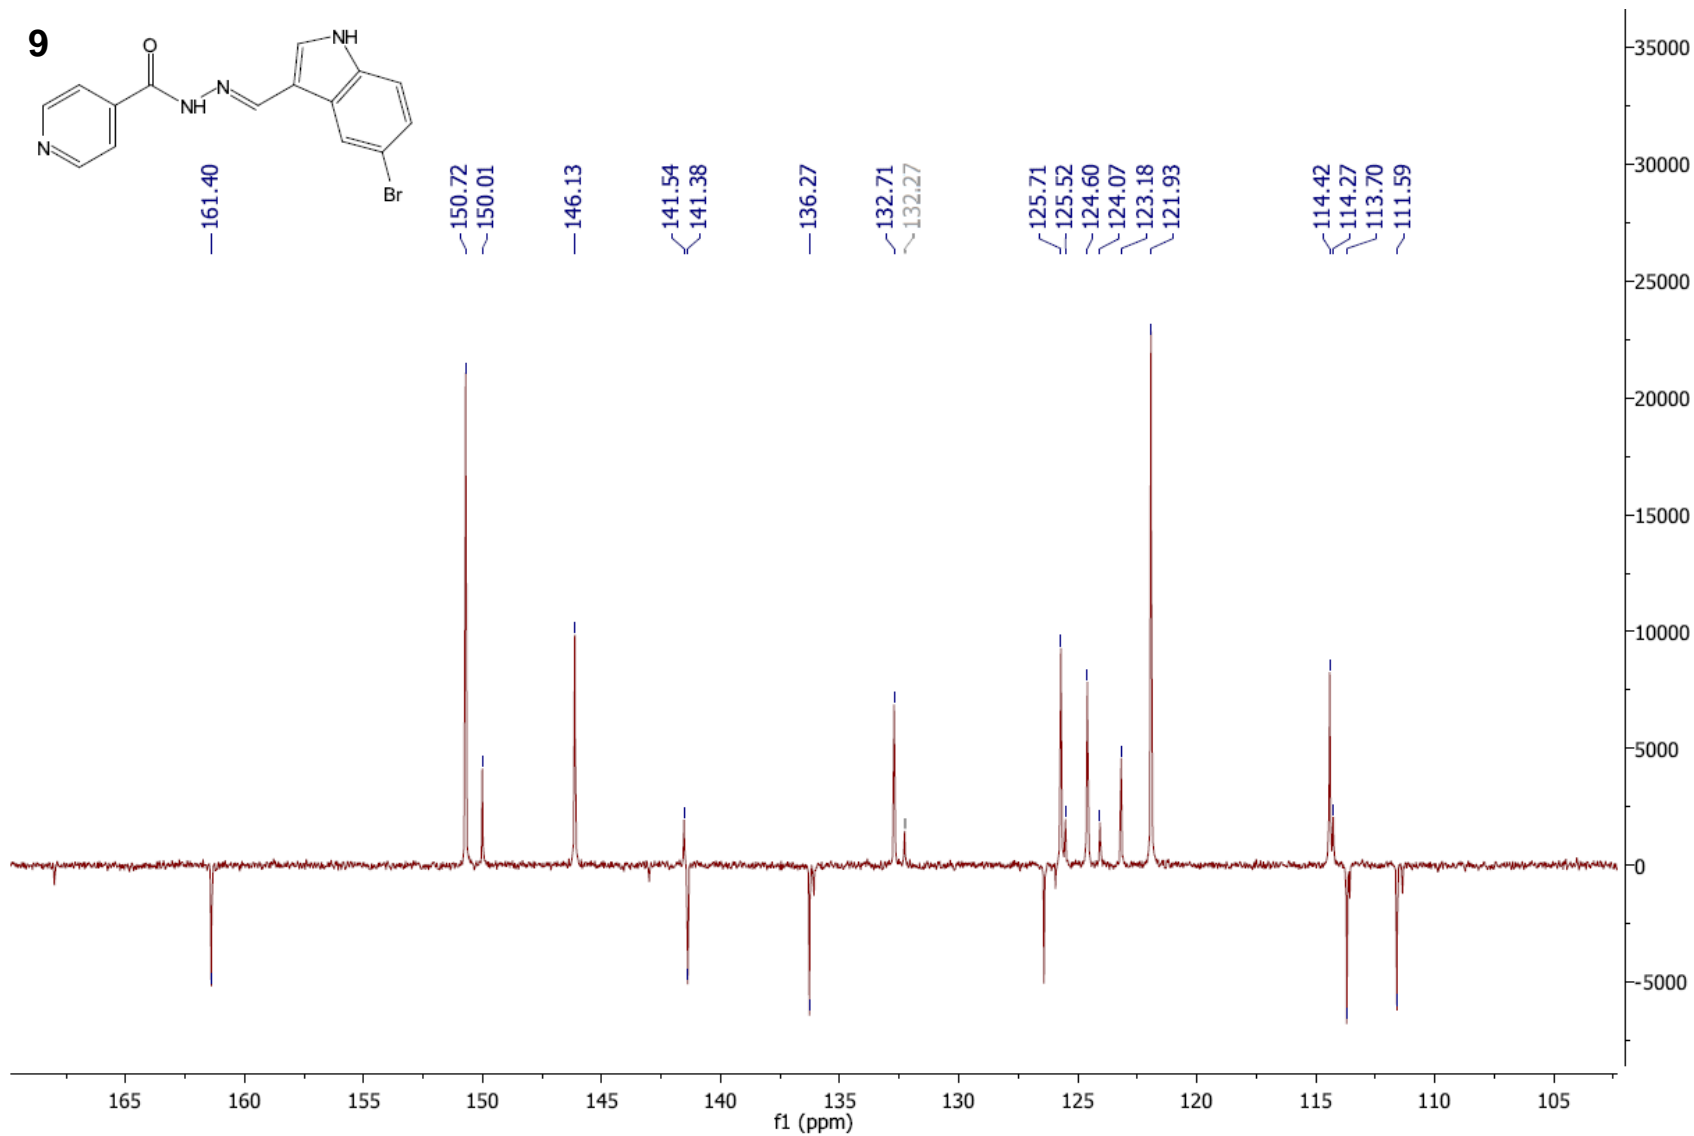



# <sup>1</sup>H NMR

10

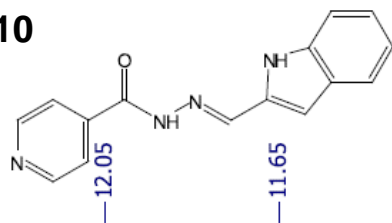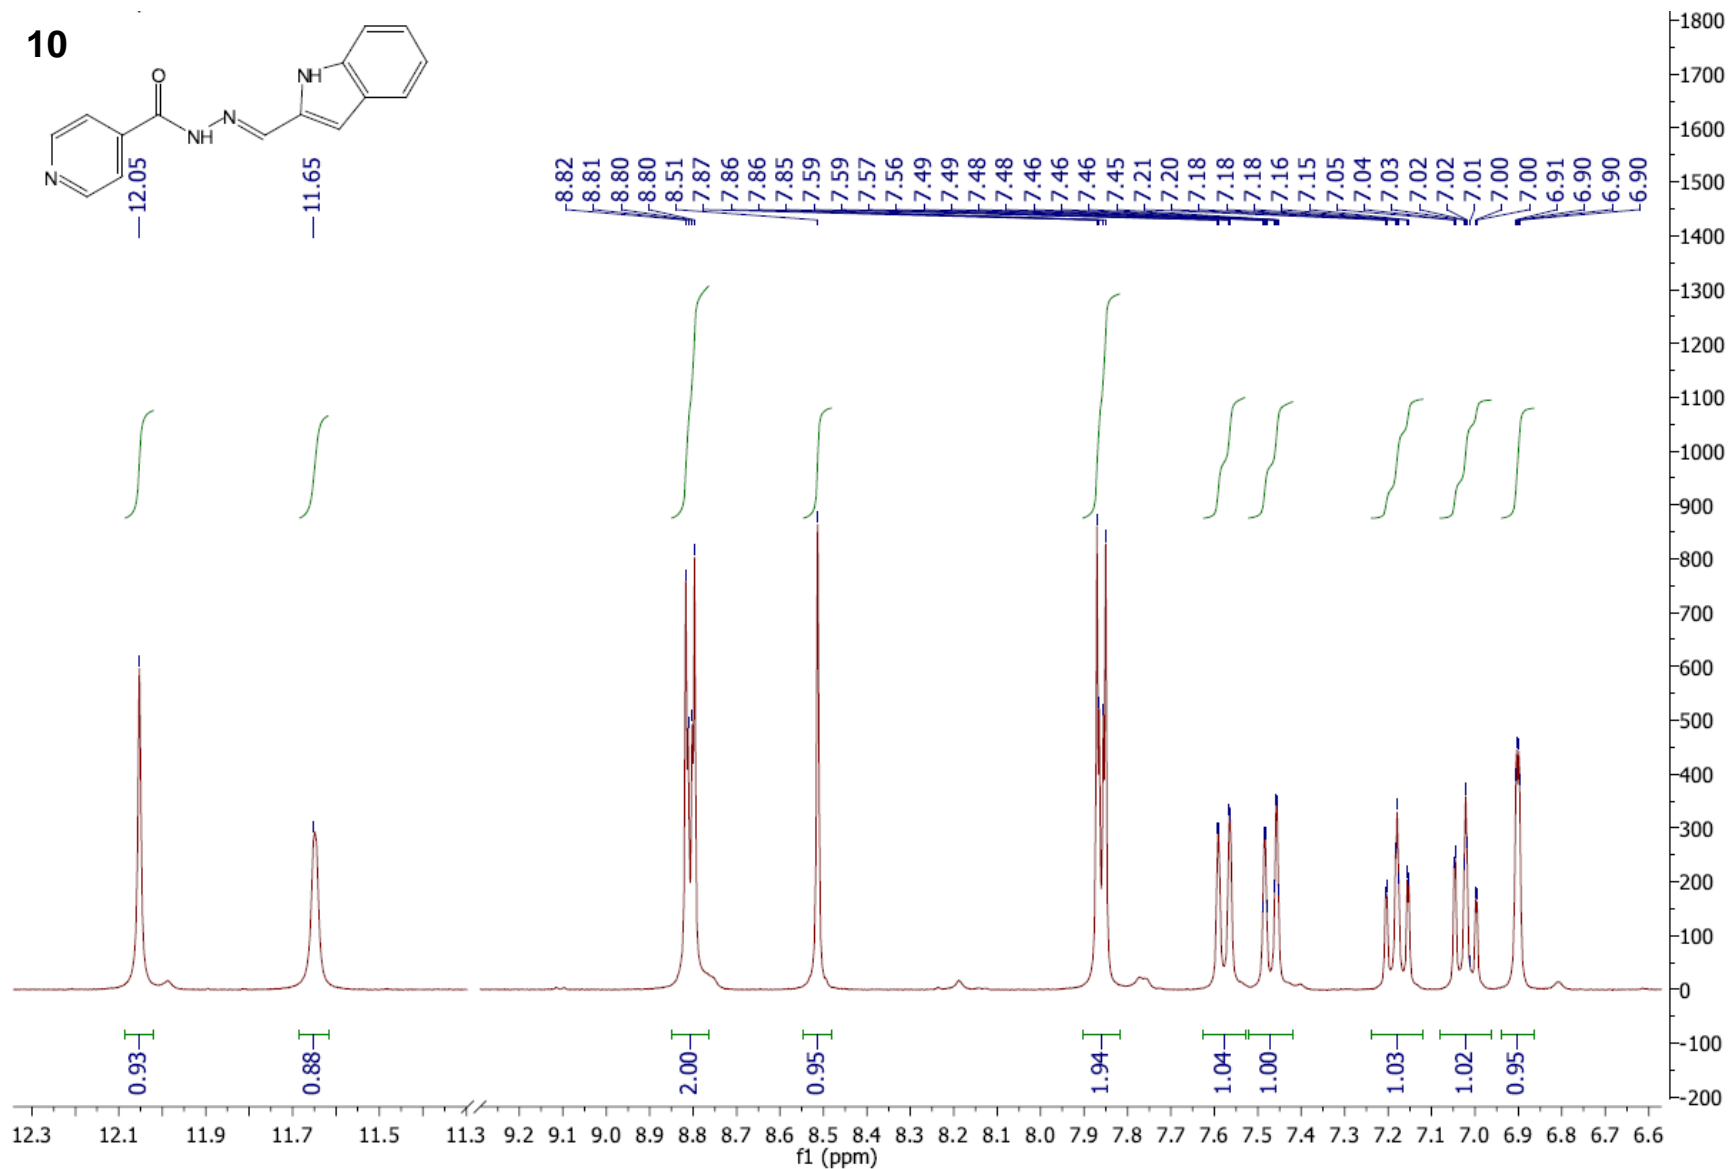

# <sup>13</sup>C NMR

10

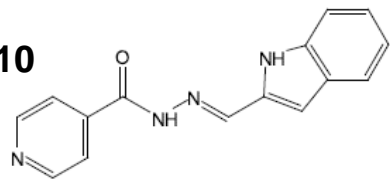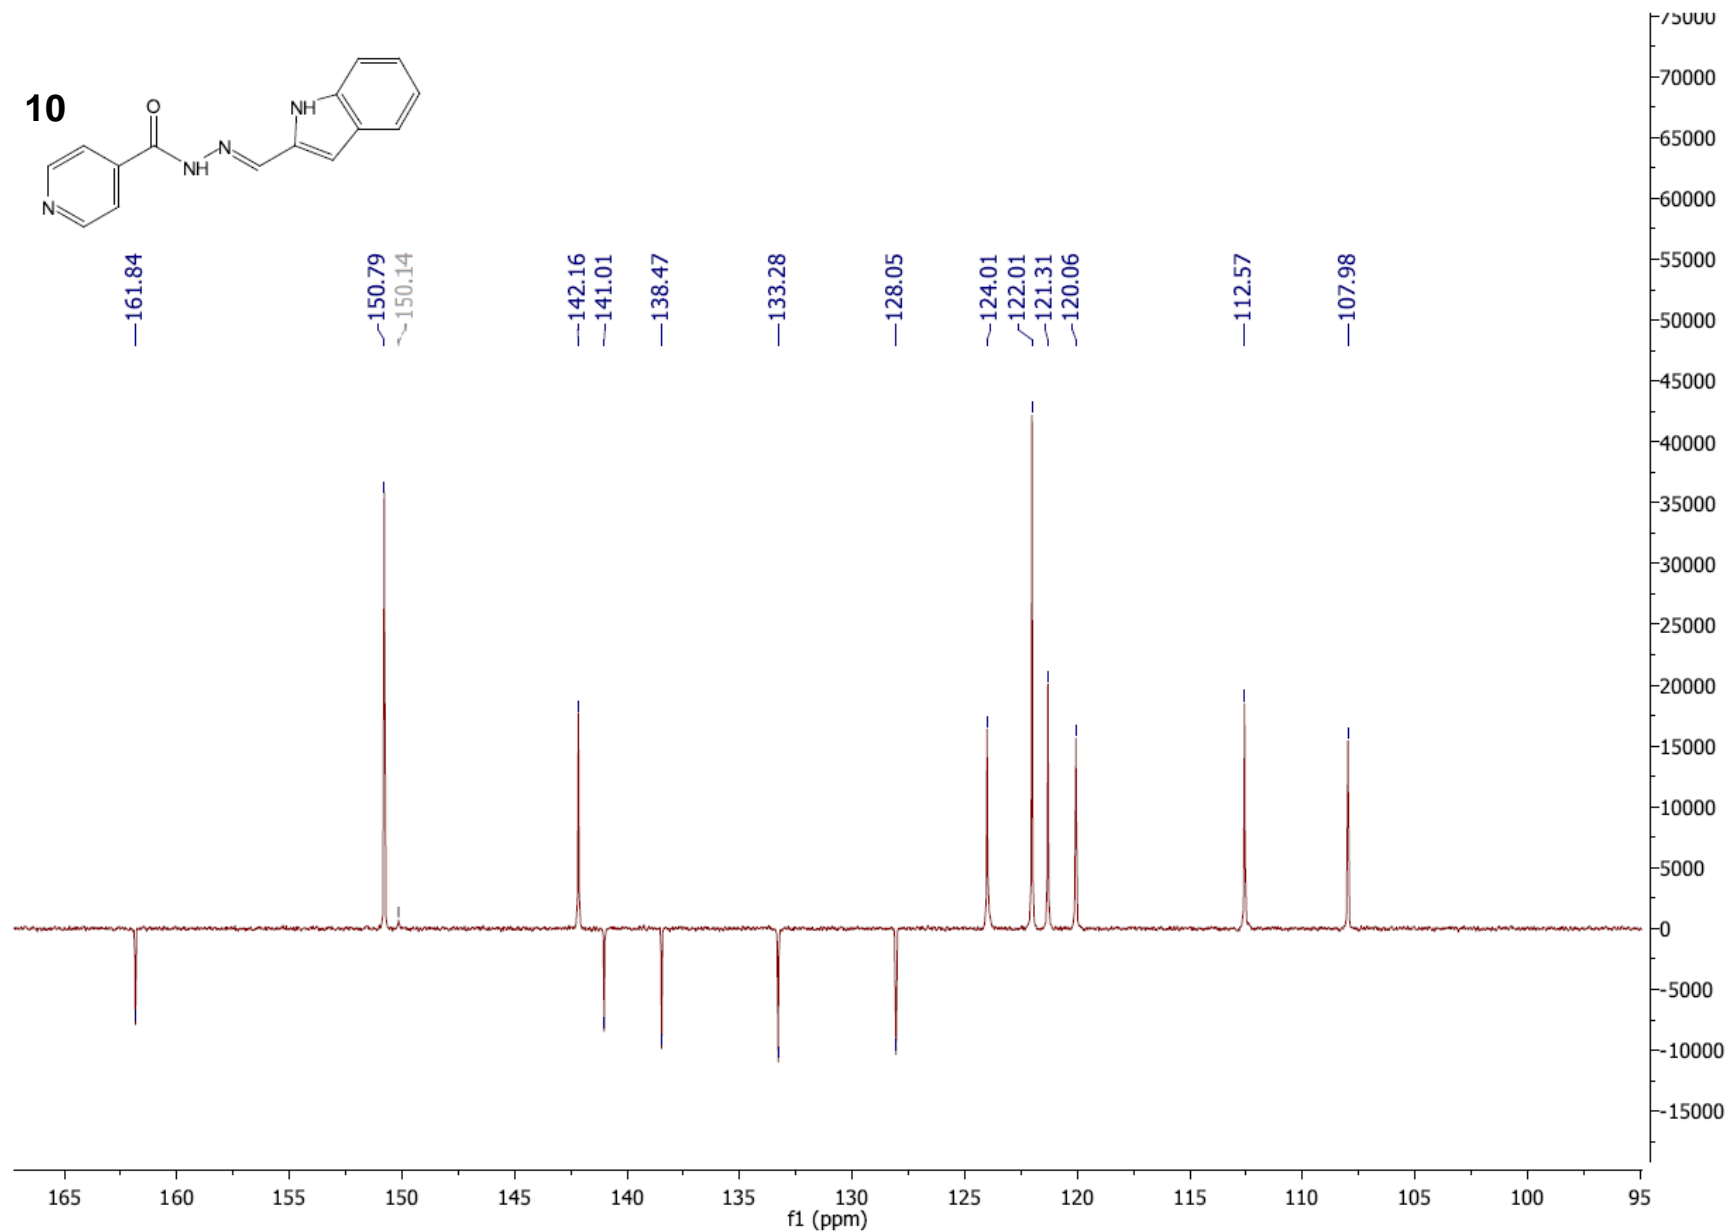

# <sup>1</sup>H NMR

11

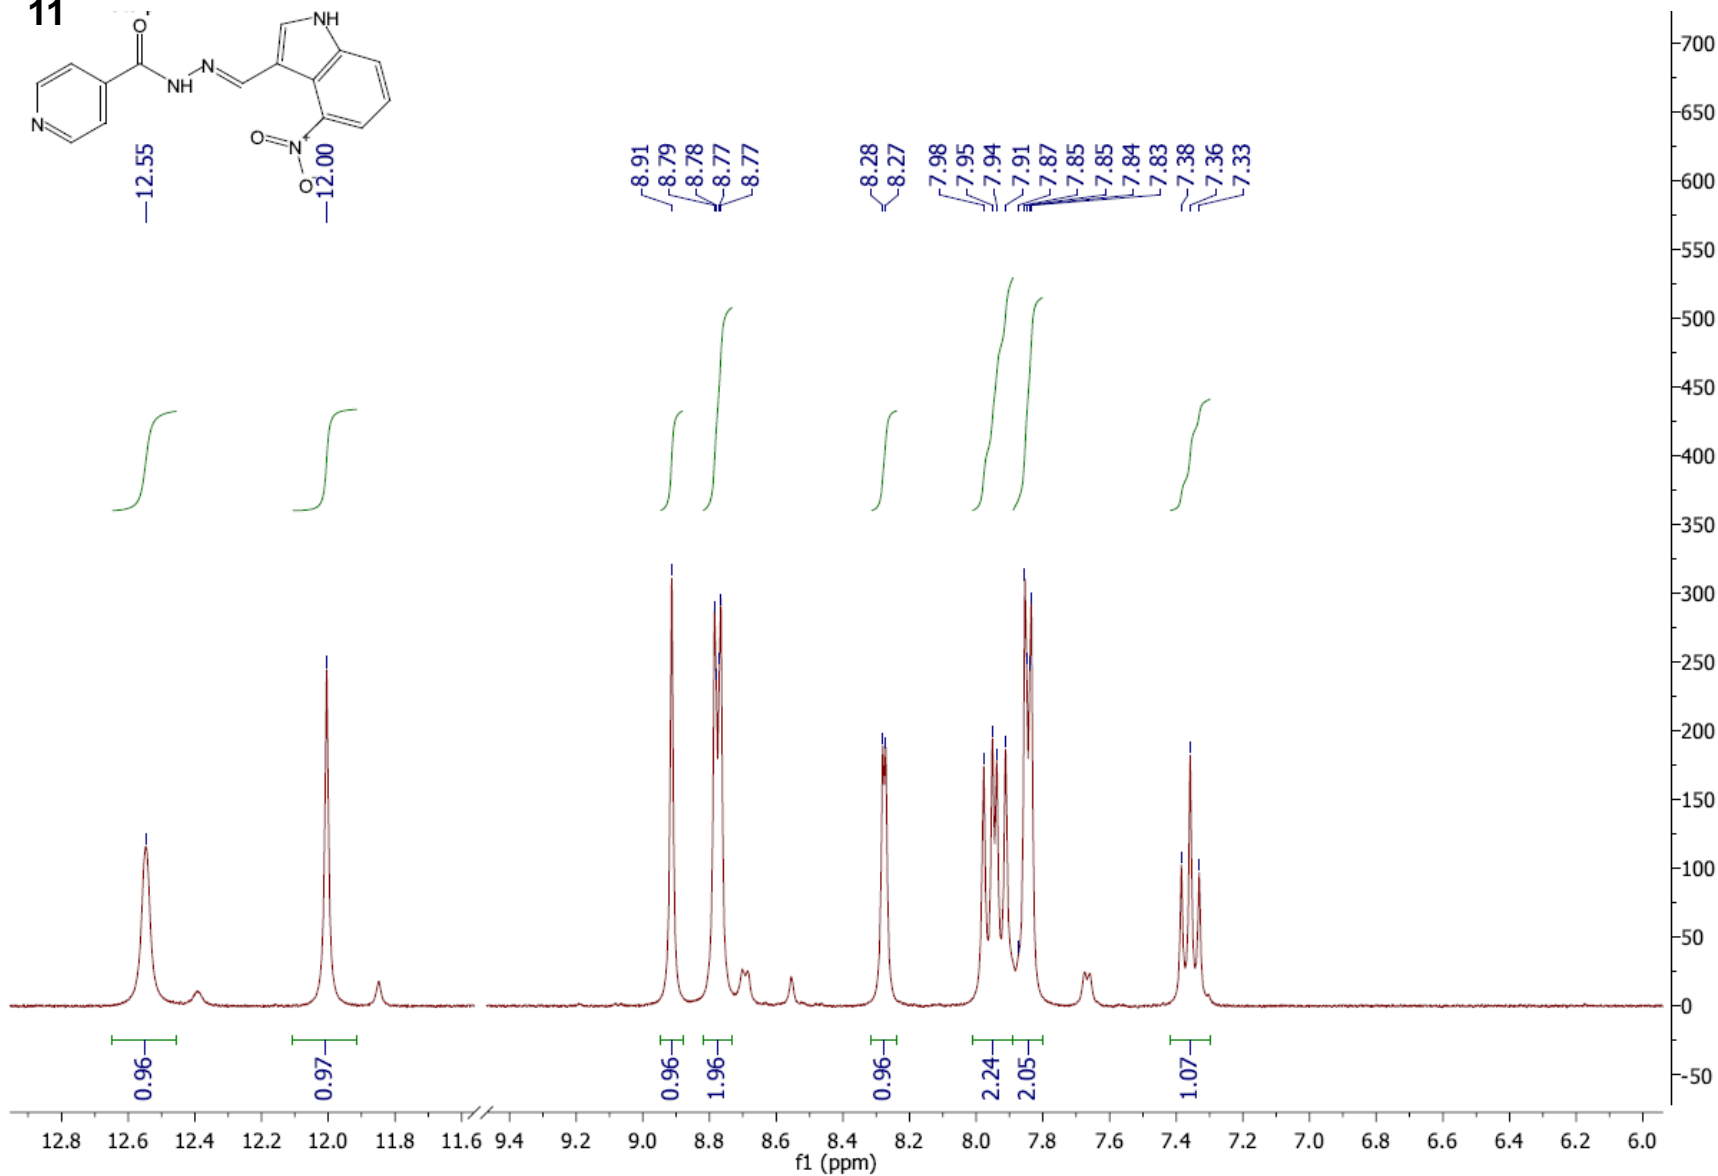

# <sup>13</sup>C NMR

11

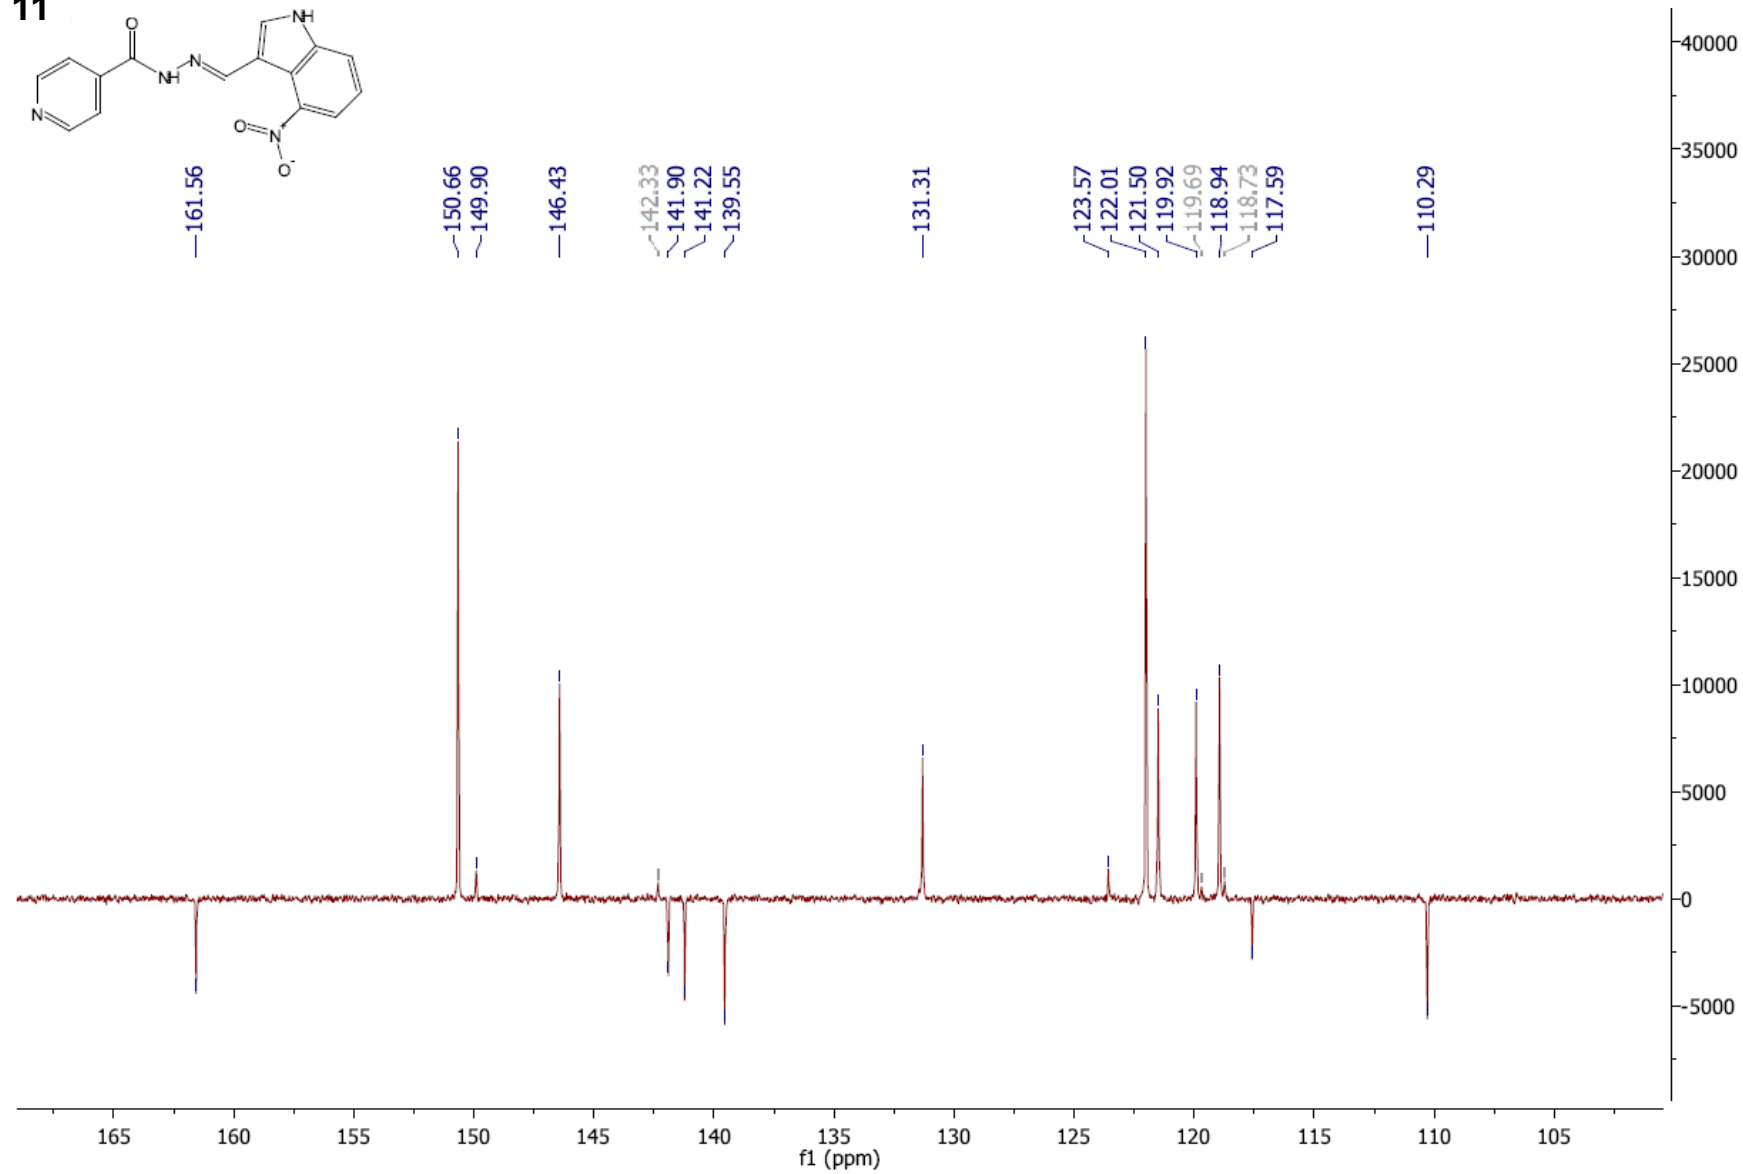

Supplement: molecules-22-01457-s001.pdf [file molecules-22-01457-s001.pdf]
